# Supplementary material for: New Monoterpenoid Indole Alkaloids from Tabernaemontana crassa Inhibit β-Amyloid42 Production and Phospho-Tau (Thr217)
Source: MDPI journal article supplement (doi:10.3390/ijms24021487), 2023-01-12

## Supplementary Materials

# New Monoterpenoid Indole Alkaloids from *Tabernaemontana crassa* Inhibit $\beta$ -Amyloid<sub>42</sub> Production and Phospho-Tau (Thr217)

Sheng Li <sup>1</sup>, Ling-Ling Han <sup>1</sup>, Ke-Pu Huang <sup>1</sup>, Ye-Han Ma <sup>1</sup>, Ling-Li Guo <sup>1</sup>, Yarong Guo <sup>2,3</sup>, Xiaoqian Ran <sup>2,4</sup>, Yong-Gang Yao <sup>2,4</sup>, Xiao-Jiang Hao <sup>1</sup>, Rongcan Luo <sup>2,4,\*</sup> and Yu Zhang <sup>1,\*</sup>

<sup>1</sup> Key Laboratory of Phytochemistry and Plant Resources in West China, Kunming Institute of Botany, Chinese Academy of Sciences, Kunming 650201, China

<sup>2</sup> Key Laboratory of Animal Models and Human Disease Mechanisms of the Chinese Academy of Sciences & Yunnan Province, and KIZ-CUHK Joint Laboratory of Bioresources and Molecular Research in Common Diseases, Kunming Institute of Zoology, Chinese Academy of Sciences, Kunming 650204, China

<sup>3</sup> School of Life Sciences, Division of Life Sciences and Medicine, University of Science and Technology of China, Hefei 230026, China

<sup>4</sup> Kunming College of Life Science, University of Chinese Academy of Sciences, Kunming 650201, China

\* Correspondence: [luorongcan@mail.kiz.ac.cn](mailto:luorongcan@mail.kiz.ac.cn) (R.L.); [zhangyu@mail.kib.ac.cn](mailto:zhangyu@mail.kib.ac.cn) (Y.Z.)

## Contents

### Extraction and Isolation.

**Figure S1.**  $^1\text{H}$  NMR spectrum of tabercrassine A (**1**) in acetone- $d_6$  (500 MHz).

**Figure S2.**  $^{13}\text{C}$  NMR spectrum of tabercrassine A (**1**) in acetone- $d_6$  (125 MHz).

**Figure S3.** HSQC spectrum of tabercrassine A (**1**) in acetone- $d_6$ .

**Figure S4.**  $^1\text{H}$ - $^1\text{H}$  COSY spectrum of tabercrassine A (**1**) in acetone- $d_6$ .

**Figure S5.** HMBC spectrum of tabercrassine A (**1**) in acetone- $d_6$ .

**Figure S6.** ROESY spectrum of tabercrassine A (**1**) in acetone- $d_6$ .

**Figure S7.** HRESIMS spectrum of tabercrassine A (**1**).

**Figure S8.** IR spectrum of tabercrassine A (**1**).

**Figure S9.** ECD spectrum of tabercrassine A (**1**) in MeOH.

**Figure S10.**  $^1\text{H}$  NMR spectrum of tabercrassine B (**2**) in acetone- $d_6$  (500 MHz).

**Figure S11.**  $^{13}\text{C}$  NMR spectrum of tabercrassine B (**2**) in acetone- $d_6$  (125 MHz).

**Figure S12.** HSQC spectrum of tabercrassine B (**2**) in acetone- $d_6$ .

**Figure S13.**  $^1\text{H}$ - $^1\text{H}$  COSY spectrum of tabercrassine B (**2**) in acetone- $d_6$ .

**Figure S14.** HMBC spectrum of tabercrassine B (**2**) in acetone- $d_6$ .

**Figure S15.** ROESY spectrum of tabercrassine B (**2**) in acetone- $d_6$ .

**Figure S16.** HRESIMS spectrum of tabercrassine B (**2**).

**Figure S17.** IR spectrum of tabercrassine B (**2**).

**Figure S18.** ECD spectrum of tabercrassine B (**2**) in MeOH.

**Figure S19.**  $^1\text{H}$  NMR spectrum of tabercrassine C (**3**) in acetone- $d_6$  (600 MHz).

**Figure S20.**  $^{13}\text{C}$  NMR spectrum of tabercrassine C (**3**) in acetone- $d_6$  (150 MHz).

**Figure S21.** HSQC spectrum of tabercrassine C (**3**) in acetone- $d_6$ .

**Figure S22.**  $^1\text{H}$ - $^1\text{H}$  COSY spectrum of tabercrassine C (**3**) in acetone- $d_6$ .

**Figure S23.** HMBC spectrum of tabercrassine C (**3**) in acetone- $d_6$ .

**Figure S24.** ROESY spectrum of tabercrassine C (**3**) in acetone- $d_6$ .

**Figure S25.** HRESIMS spectrum of tabercrassine C (**3**).

**Figure S26.** IR spectrum of tabercrassine C (**3**).

**Figure S27.** ECD spectrum of tabercrassine C (**3**) in MeOH.

**Figure S28.** Calculated and experimental ECD of **2** and **3**.

**Figure S29.** Uncropped images of western blot in Figure 7.

**Extraction and Isolation.** The powdered seeds of *T. crassa* (687 g) were extracted with MeOH (2 L) under ultrasonic sound three times (2 h each time) at room temperature. The crude extract (48 g) was separated with a silica gel column eluted with petroleum ether-acetone (100:1-0:1) to yield three fractions (A-C). Fraction A (11 g) was further purified by a reversed phase chromatography on a C18 column (MeOH/H<sub>2</sub>O, 40:60→100:0, v/v) and separated with a series of silica gel column eluting with petroleum ether/acetone (50:1–5:1, v/v), and further purified by a Sephadex LH-20 column (MeOH) to afford voacangine (14.0 mg), 7 $\alpha$ -voacangine hydroxyindolenine (4.3 mg), and **3** (2.8 mg). Fraction B (15 g) was separated with a silica gel column (CC) using petroleum ether/acetone (15:1–5:1, v/v) to give three subfractions (BI-BIII). BI (3 g) was purified by silica gel column (petroleum ether/acetone, 10:1–0:1) and Sephadex LH-20 column (MeOH) to obtain coronaridine hydroxyindolenine (6.7 mg) and 3-(2'-oxopropyl)-coronaridine (28 mg). Subfraction BII (5.3 g) was separated by Sephadex LH-20 (acetone) and followed by semipreparative HPLC with MeCN/H<sub>2</sub>O (68:32, 0.1% Et<sub>2</sub>NH, 4 ml/min) to obtain voacristine (1.4 mg,  $t_R$  = 34.5 min), 10-hydroxycoronaridine (8.3 mg,  $t_R$  = 46.0 min), and **2** (3.7 mg,  $t_R$  = 52.0 min). Fraction C (7.2 g) was chromatographed with a series of silica gel column (300-400 mesh) and eluted with a gradient of CH<sub>2</sub>Cl<sub>2</sub>/CH<sub>3</sub>OH (20:1–1:1, v/v) to yield two major subfractions (CI-CII), subfraction CI (2.1 g) was purified by a Sephadex LH-20 (MeOH) and further followed by semipreparative HPLC using a YMC Triart C18 column (10  $\times$  250 mm, 5  $\mu$ m) column with MeCN/H<sub>2</sub>O (25:75, 0.1% Et<sub>2</sub>NH, 4 ml/min) to obtain isovoacangina (3.4 mg,  $t_R$  31.0 min) and **1** (8.1 mg,  $t_R$  37.0 min). Subfraction CII (2.9 g) was separated by a silica gel column eluted with petroleum ether/acetone (8:1-2:1, v/v) and followed by

semipreparative HPLC using a Waters XBridge C18 (10 × 250 mm, 5  $\mu$ m) column with MeCN/H<sub>2</sub>O (55:45, 0.1% Et<sub>2</sub>NH, 4 ml/min) to afford ervatamine (3.0 mg,  $t_R$  34.5 min).

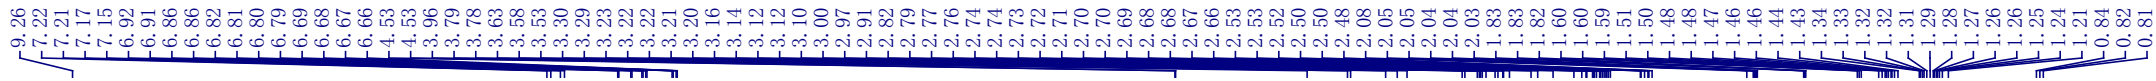

**Figure S1. <sup>1</sup>H NMR spectrum of tabercrassine A (1) in acetone-*d*<sub>6</sub> (500 MHz).**

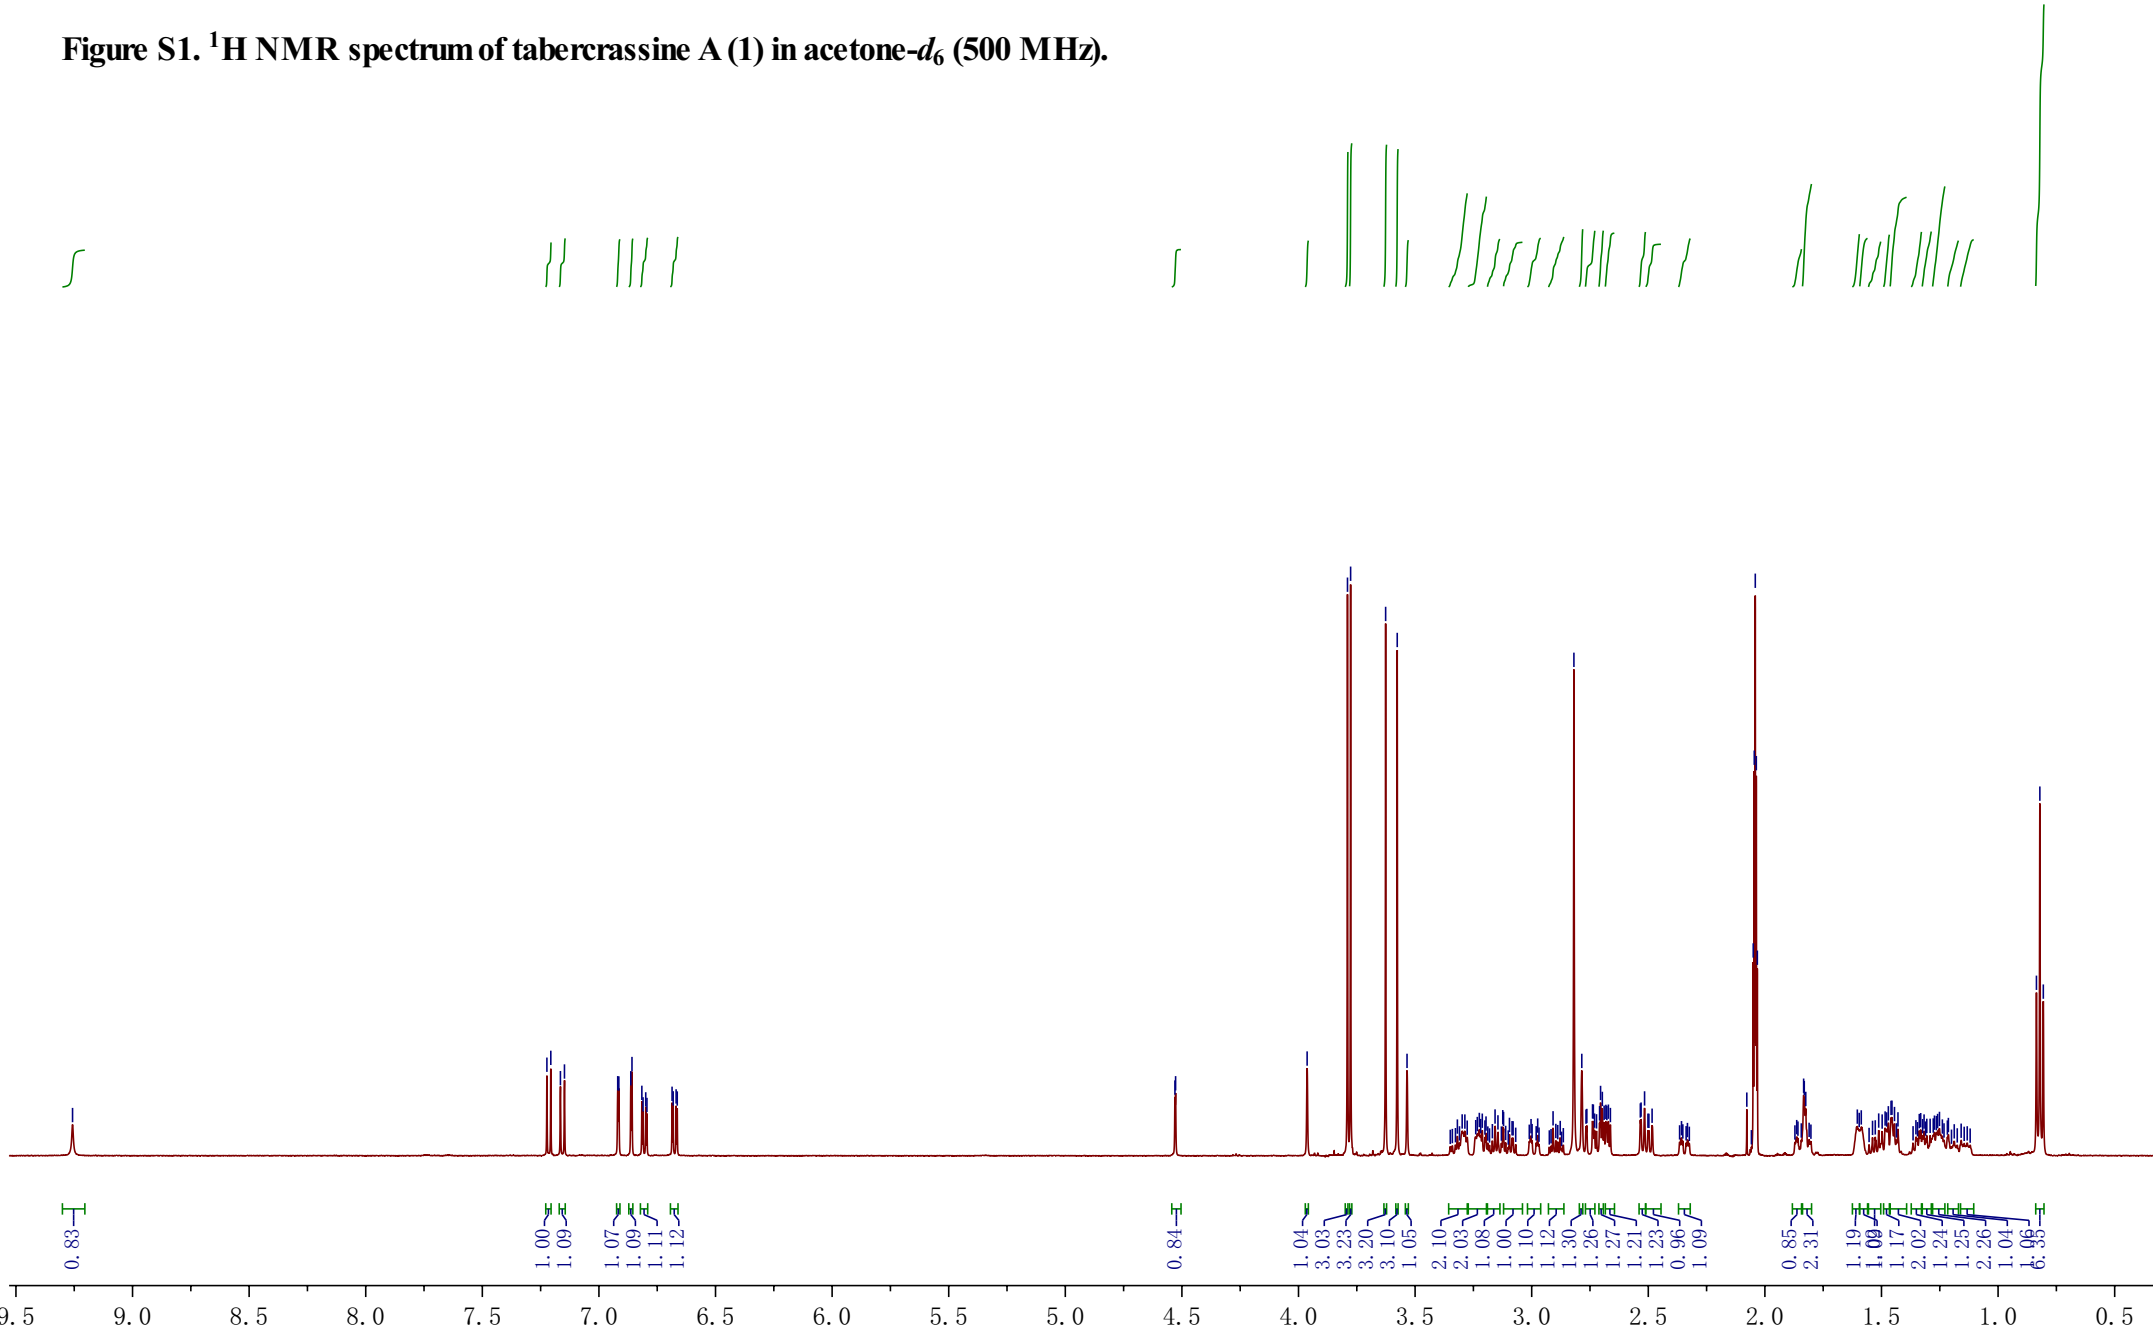

**Figure S2.  $^{13}\text{C}$  NMR spectrum of taberocrassine A (1) in acetone- $d_6$  (125 MHz).**

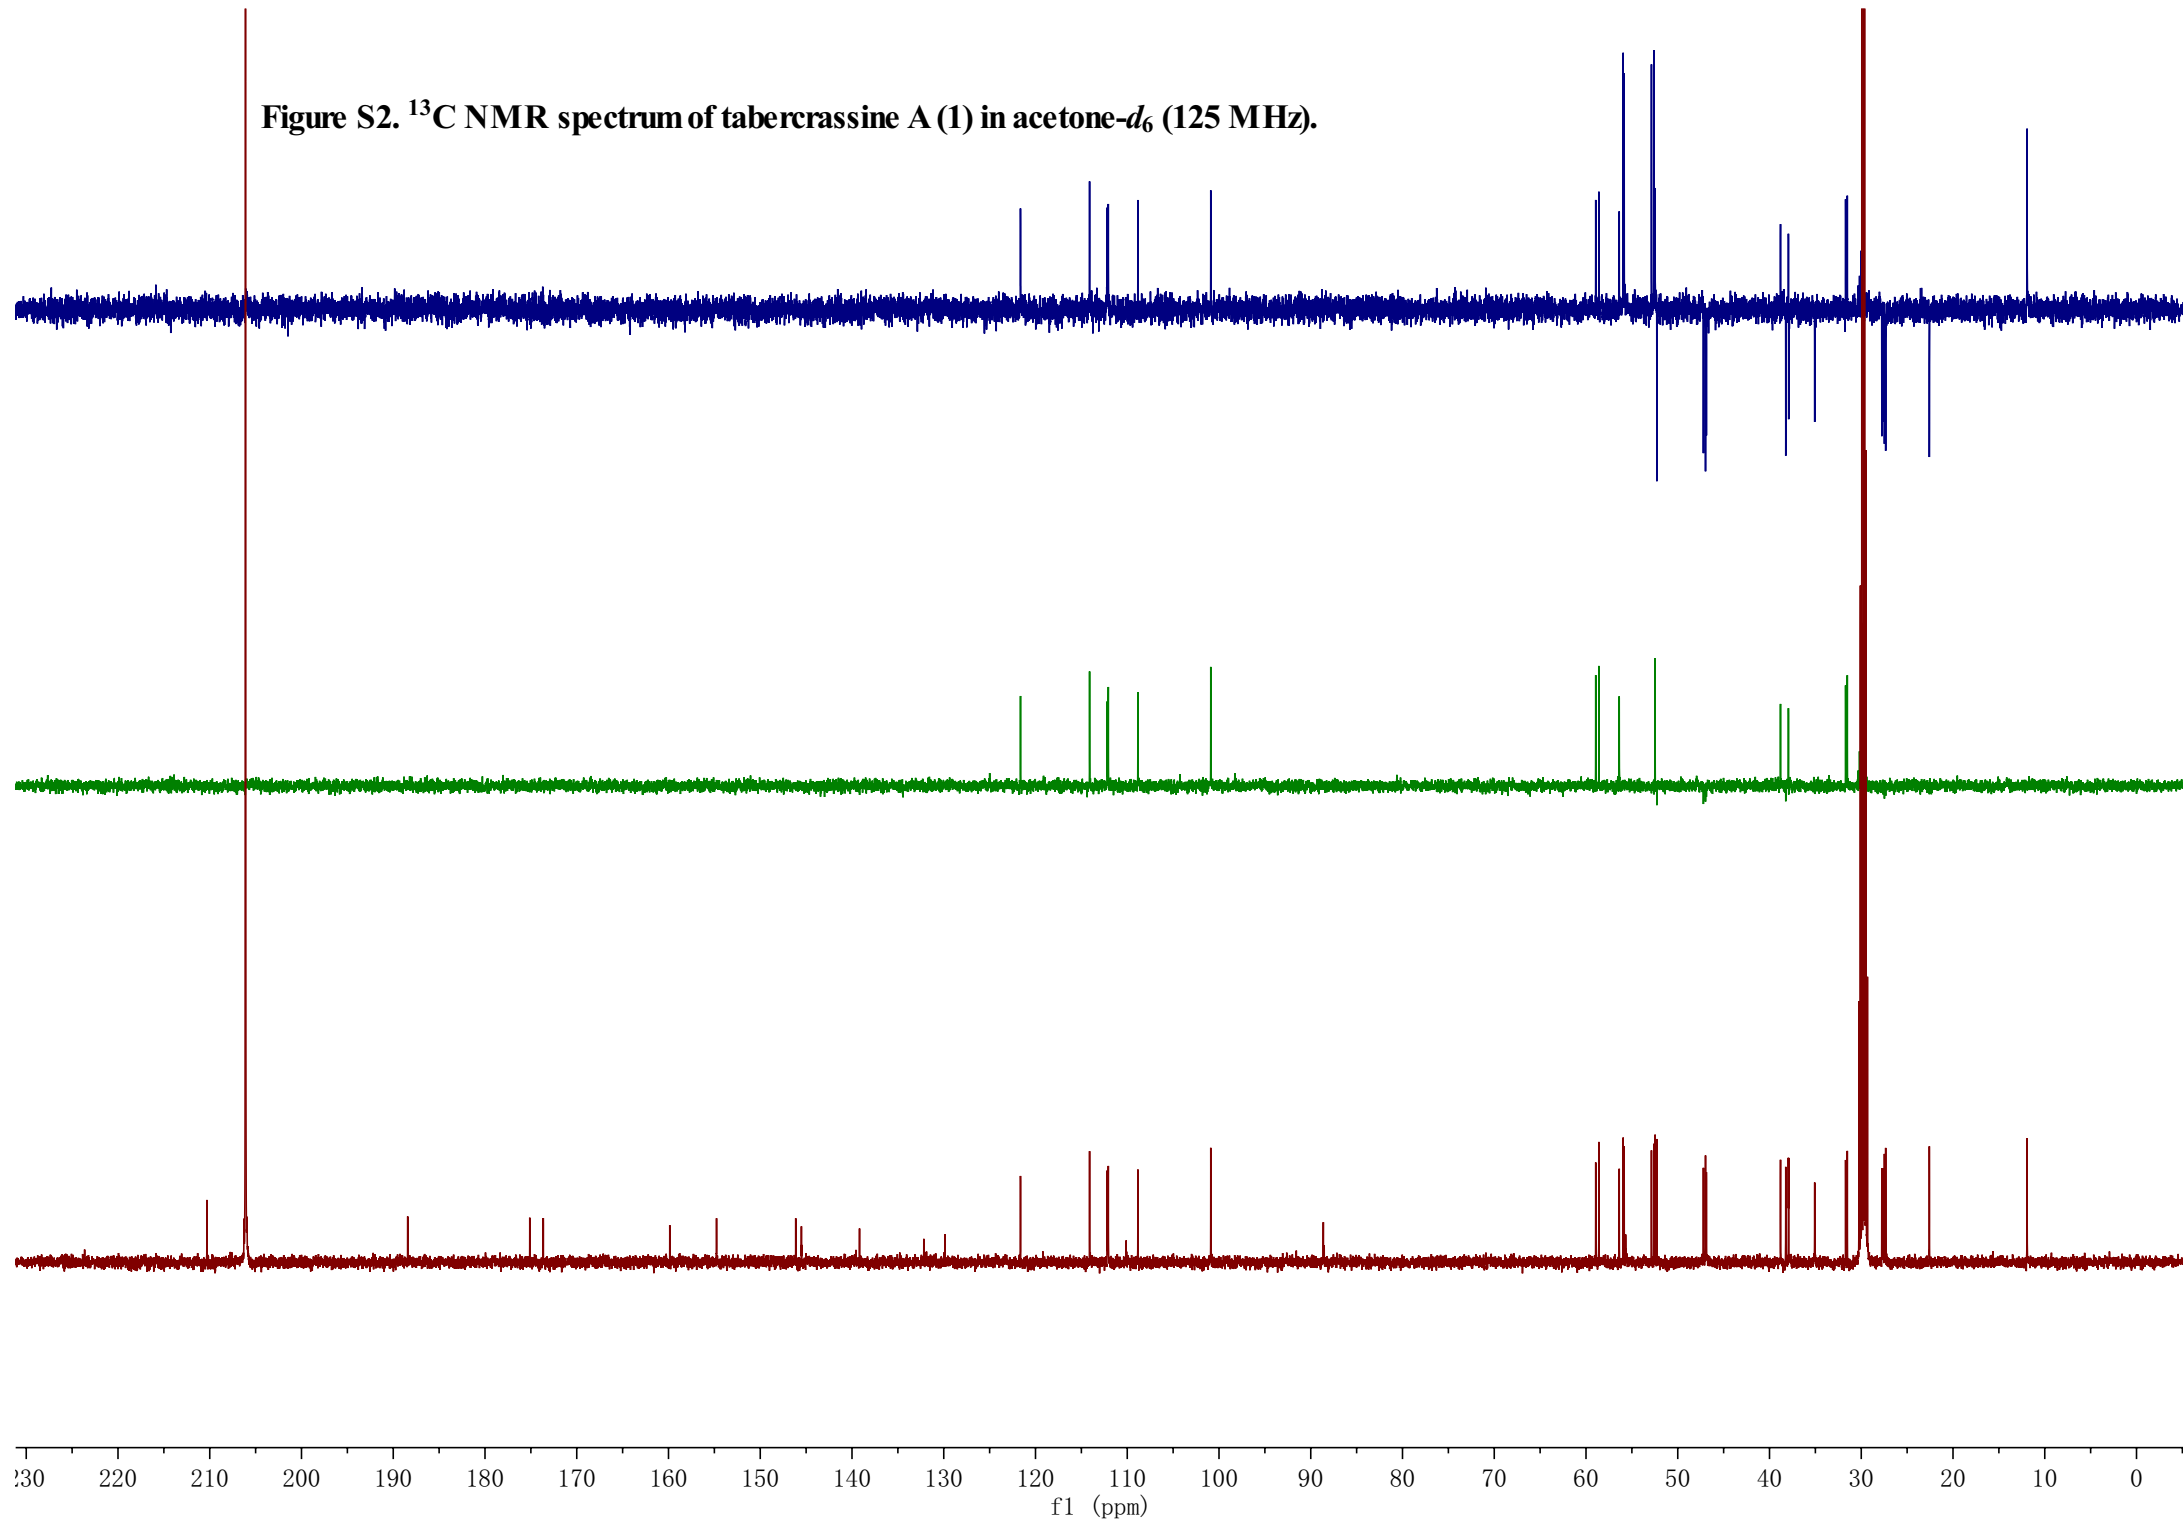

Figure S3. HSQC spectrum of taberocrassine A (1) in acetone- $d_6$ .

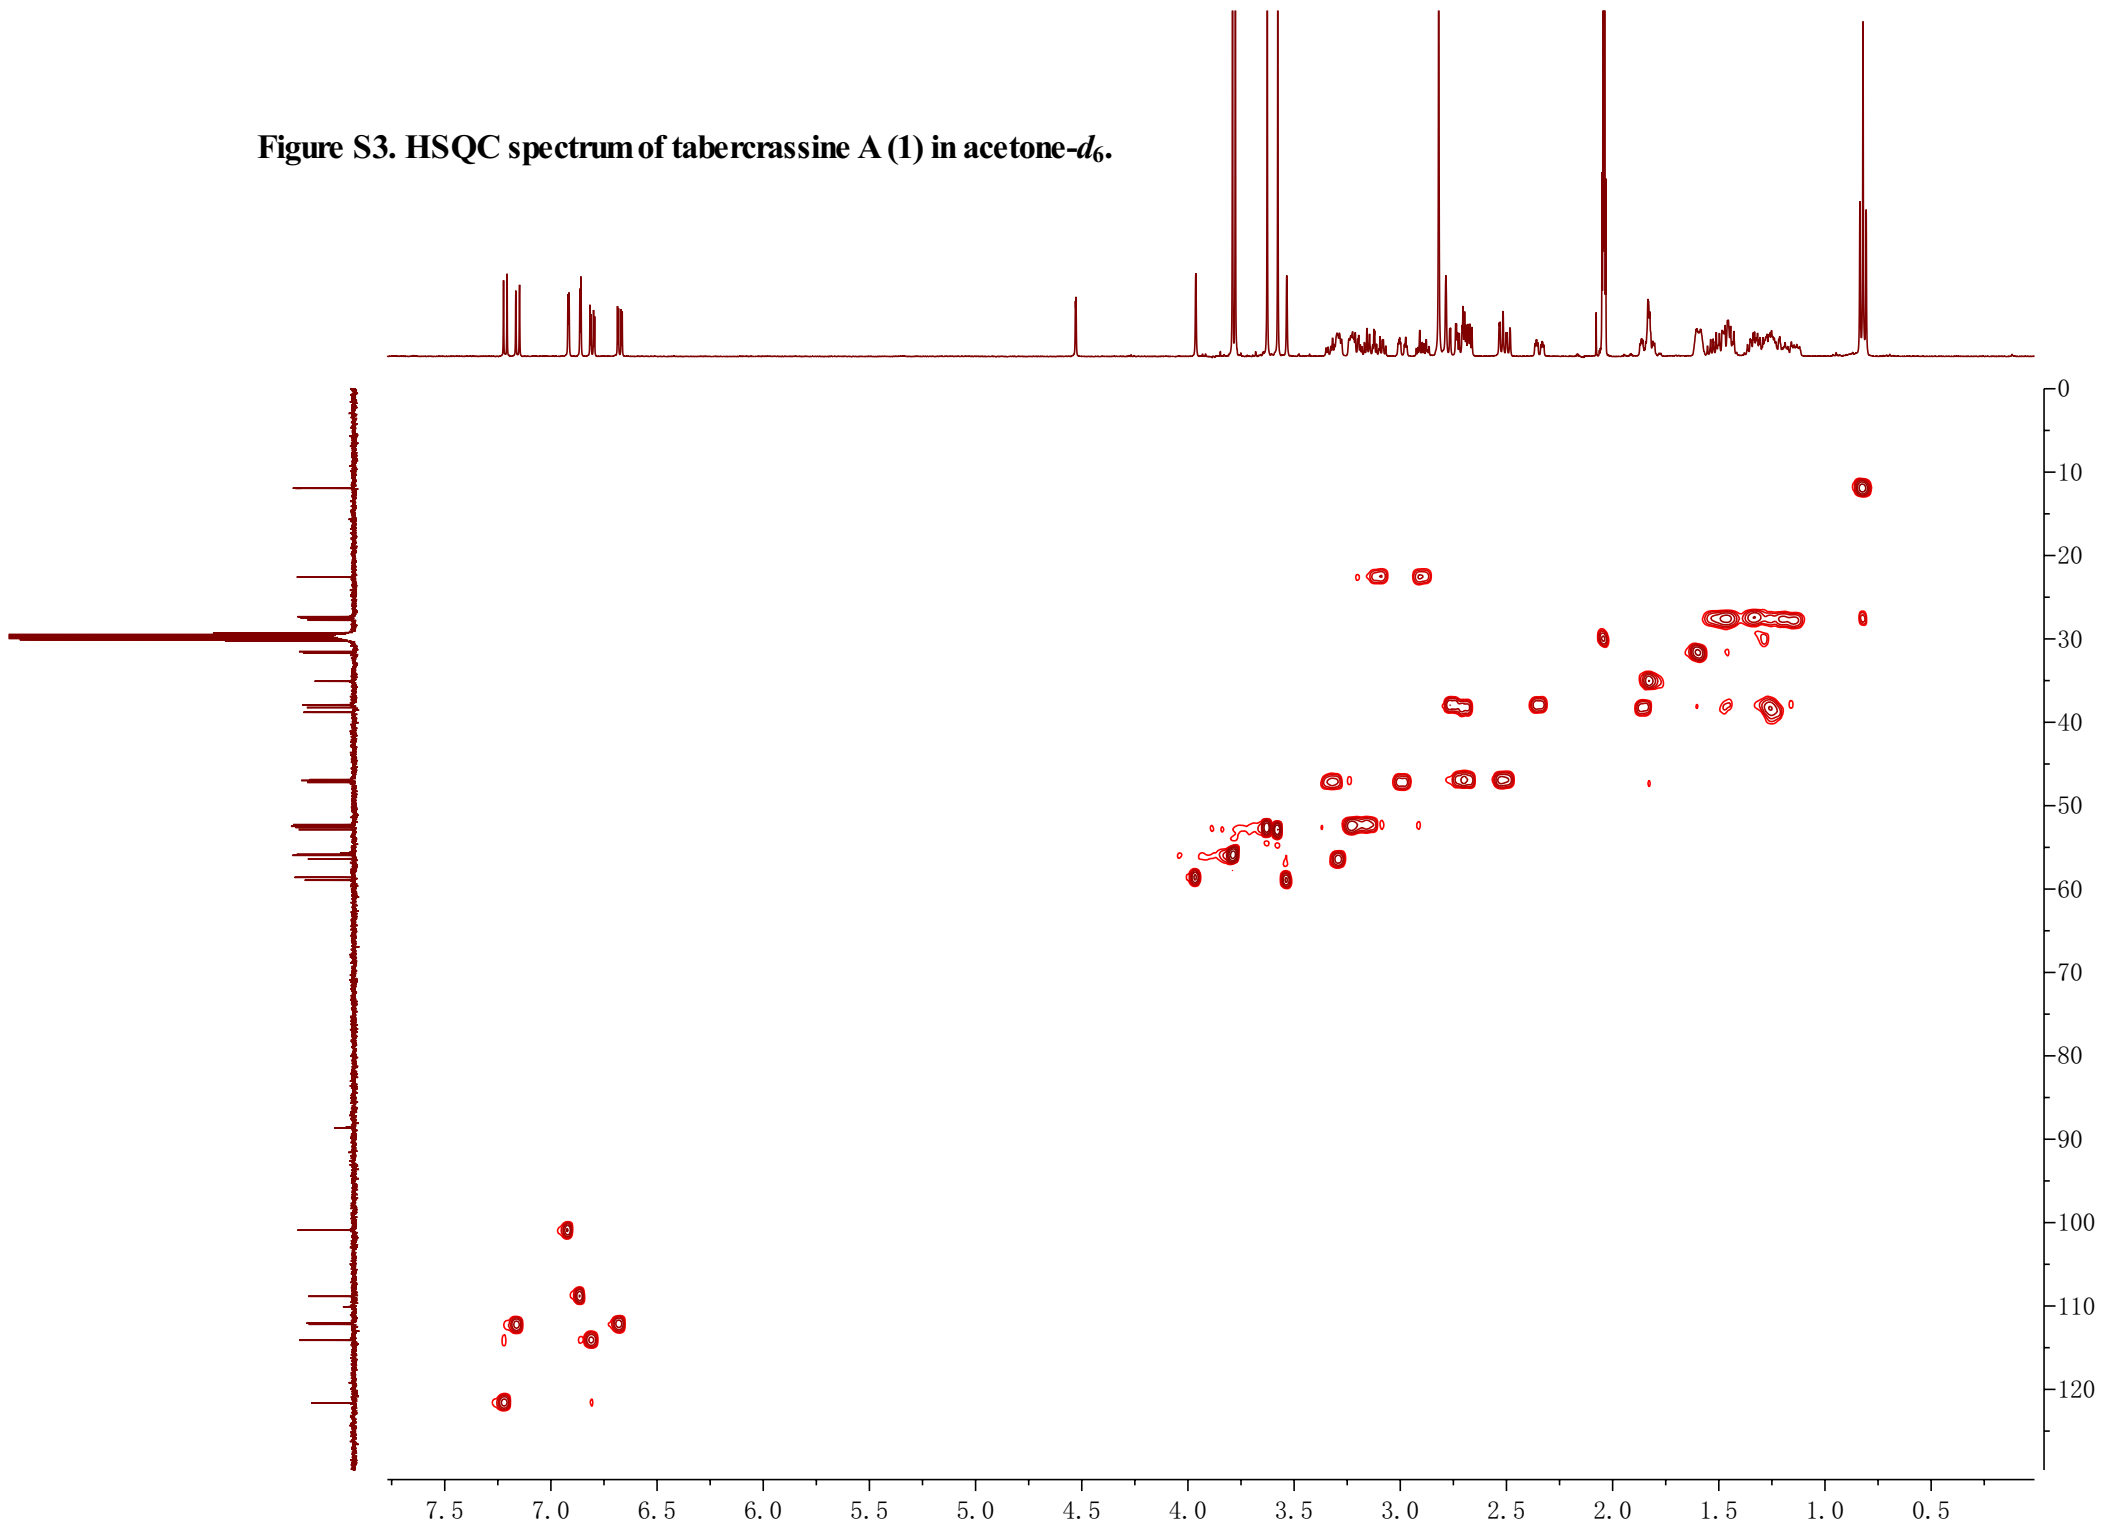

Figure S4.  $^1\text{H}$ - $^1\text{H}$  COSY spectrum of tabercrassine A (1) in acetone- $d_6$ .

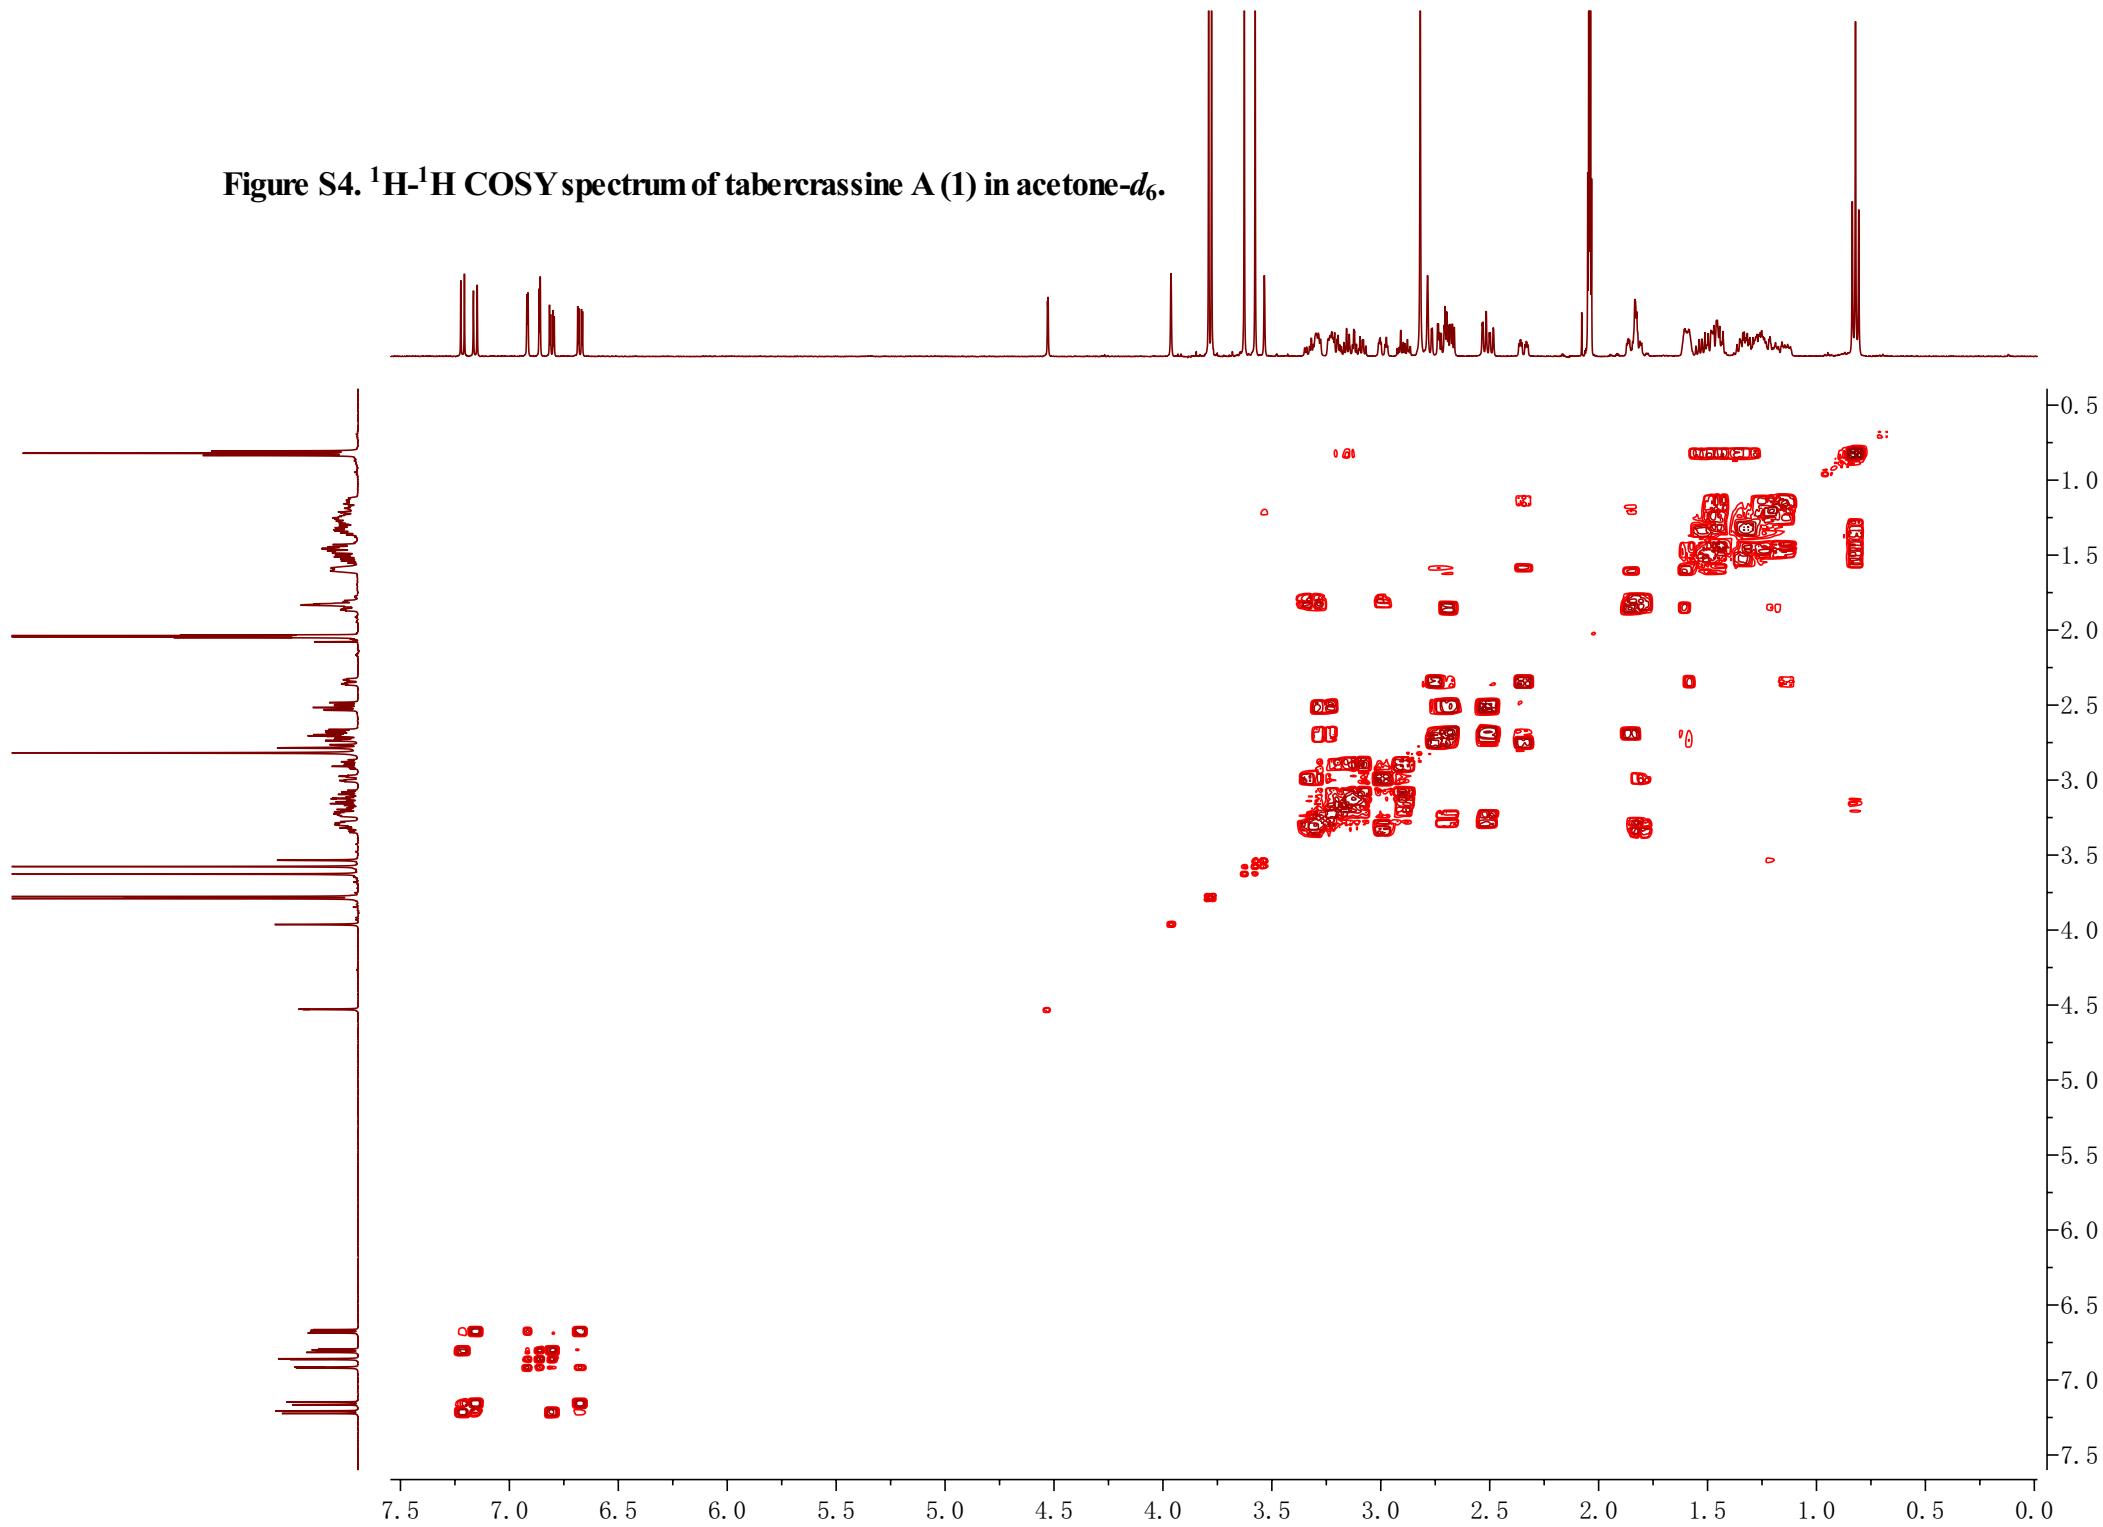



Figure S5. HMBC spectrum of tabercrassine A (1) in acetone- $d_6$ .

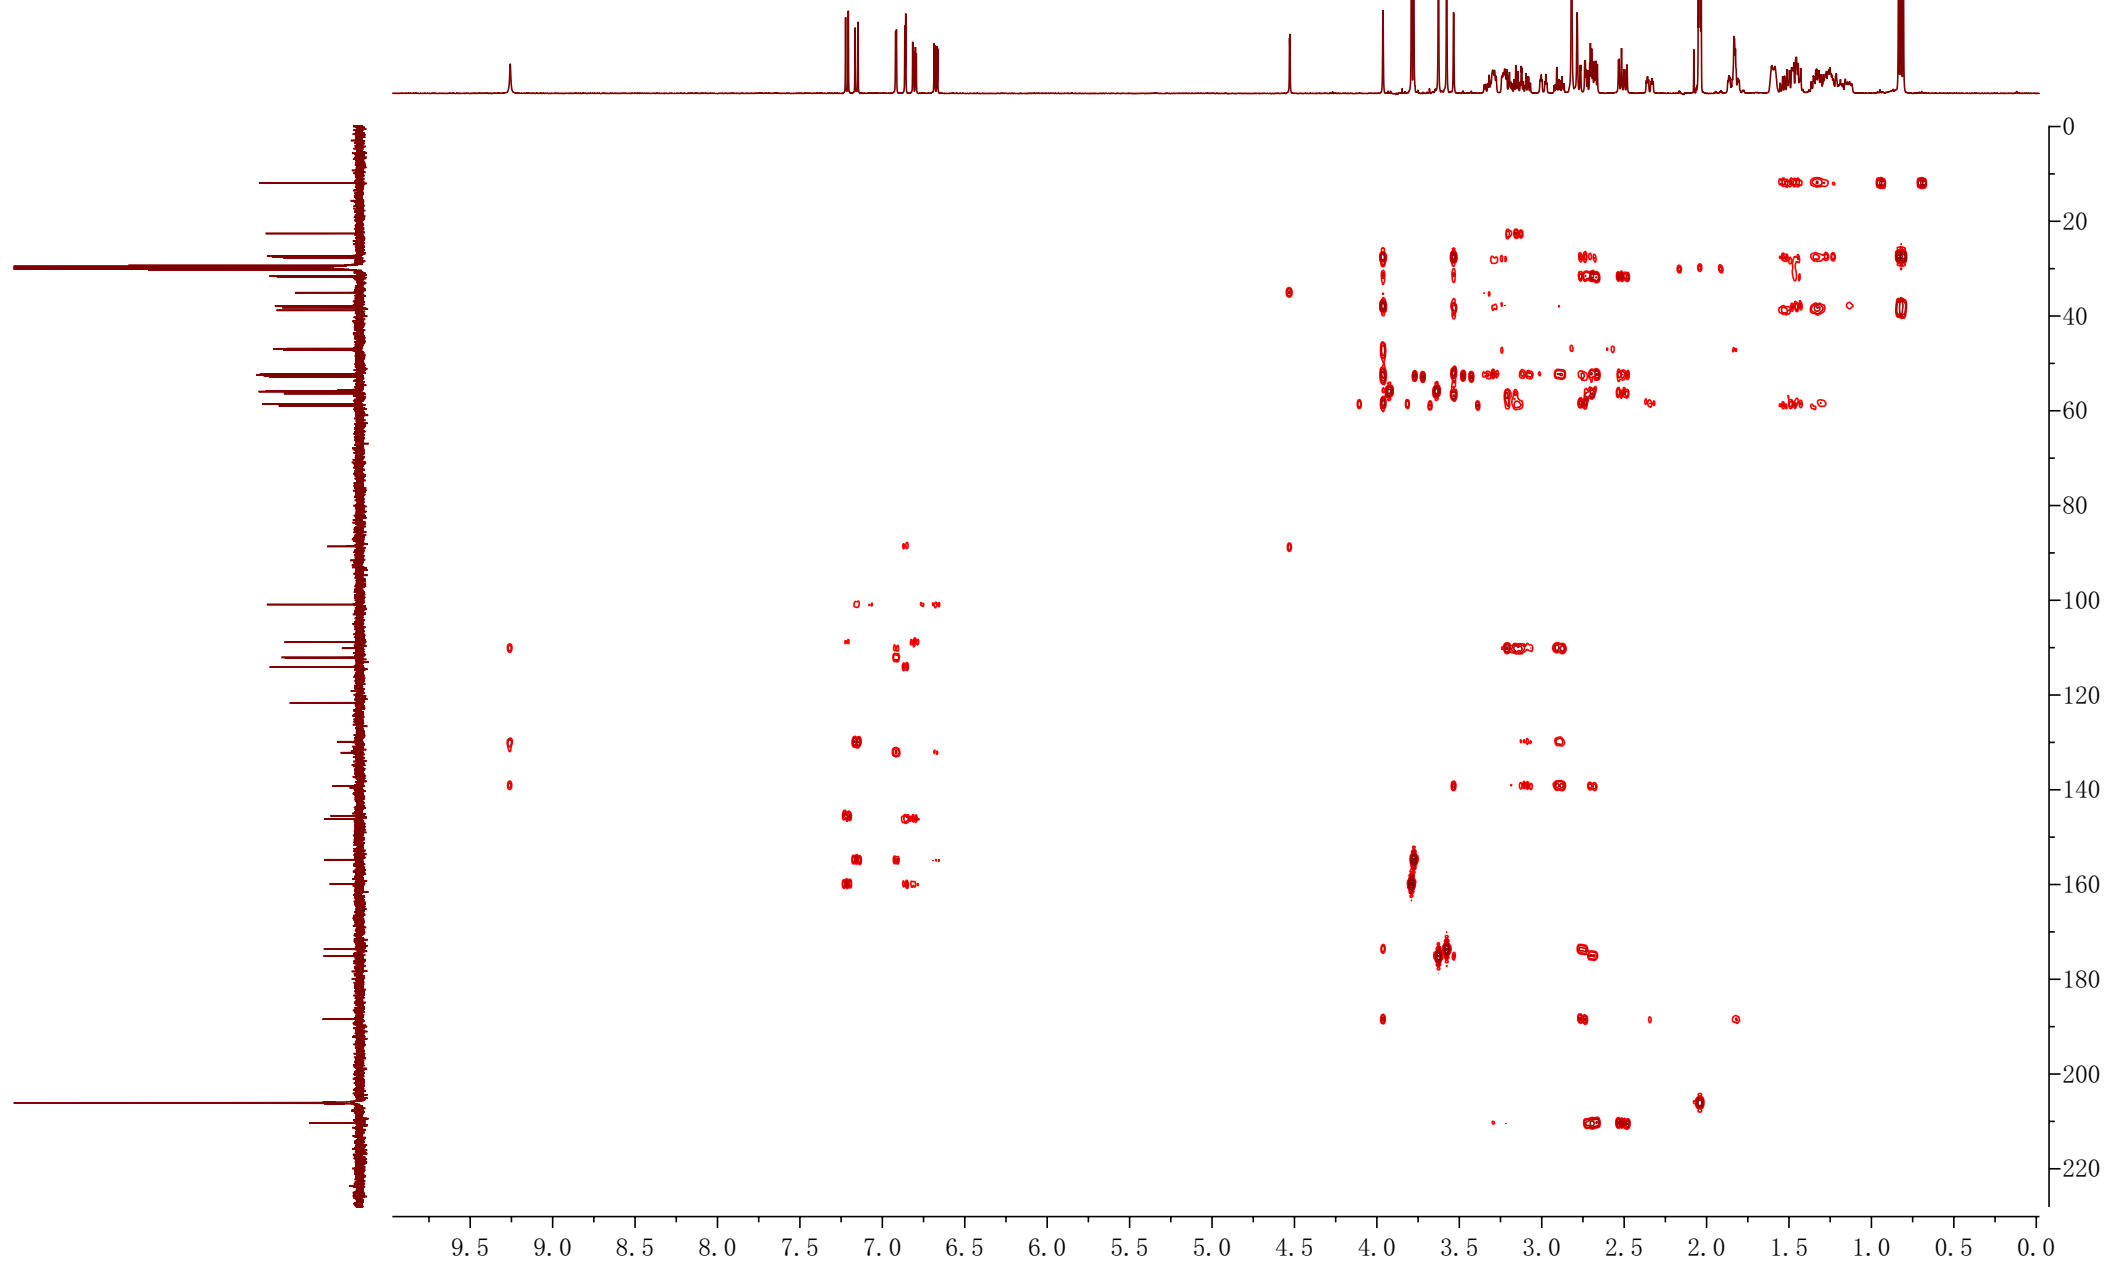

**Figure S6. ROESY spectrum of tabercrassine A (1) in acetone- $d_6$ .**

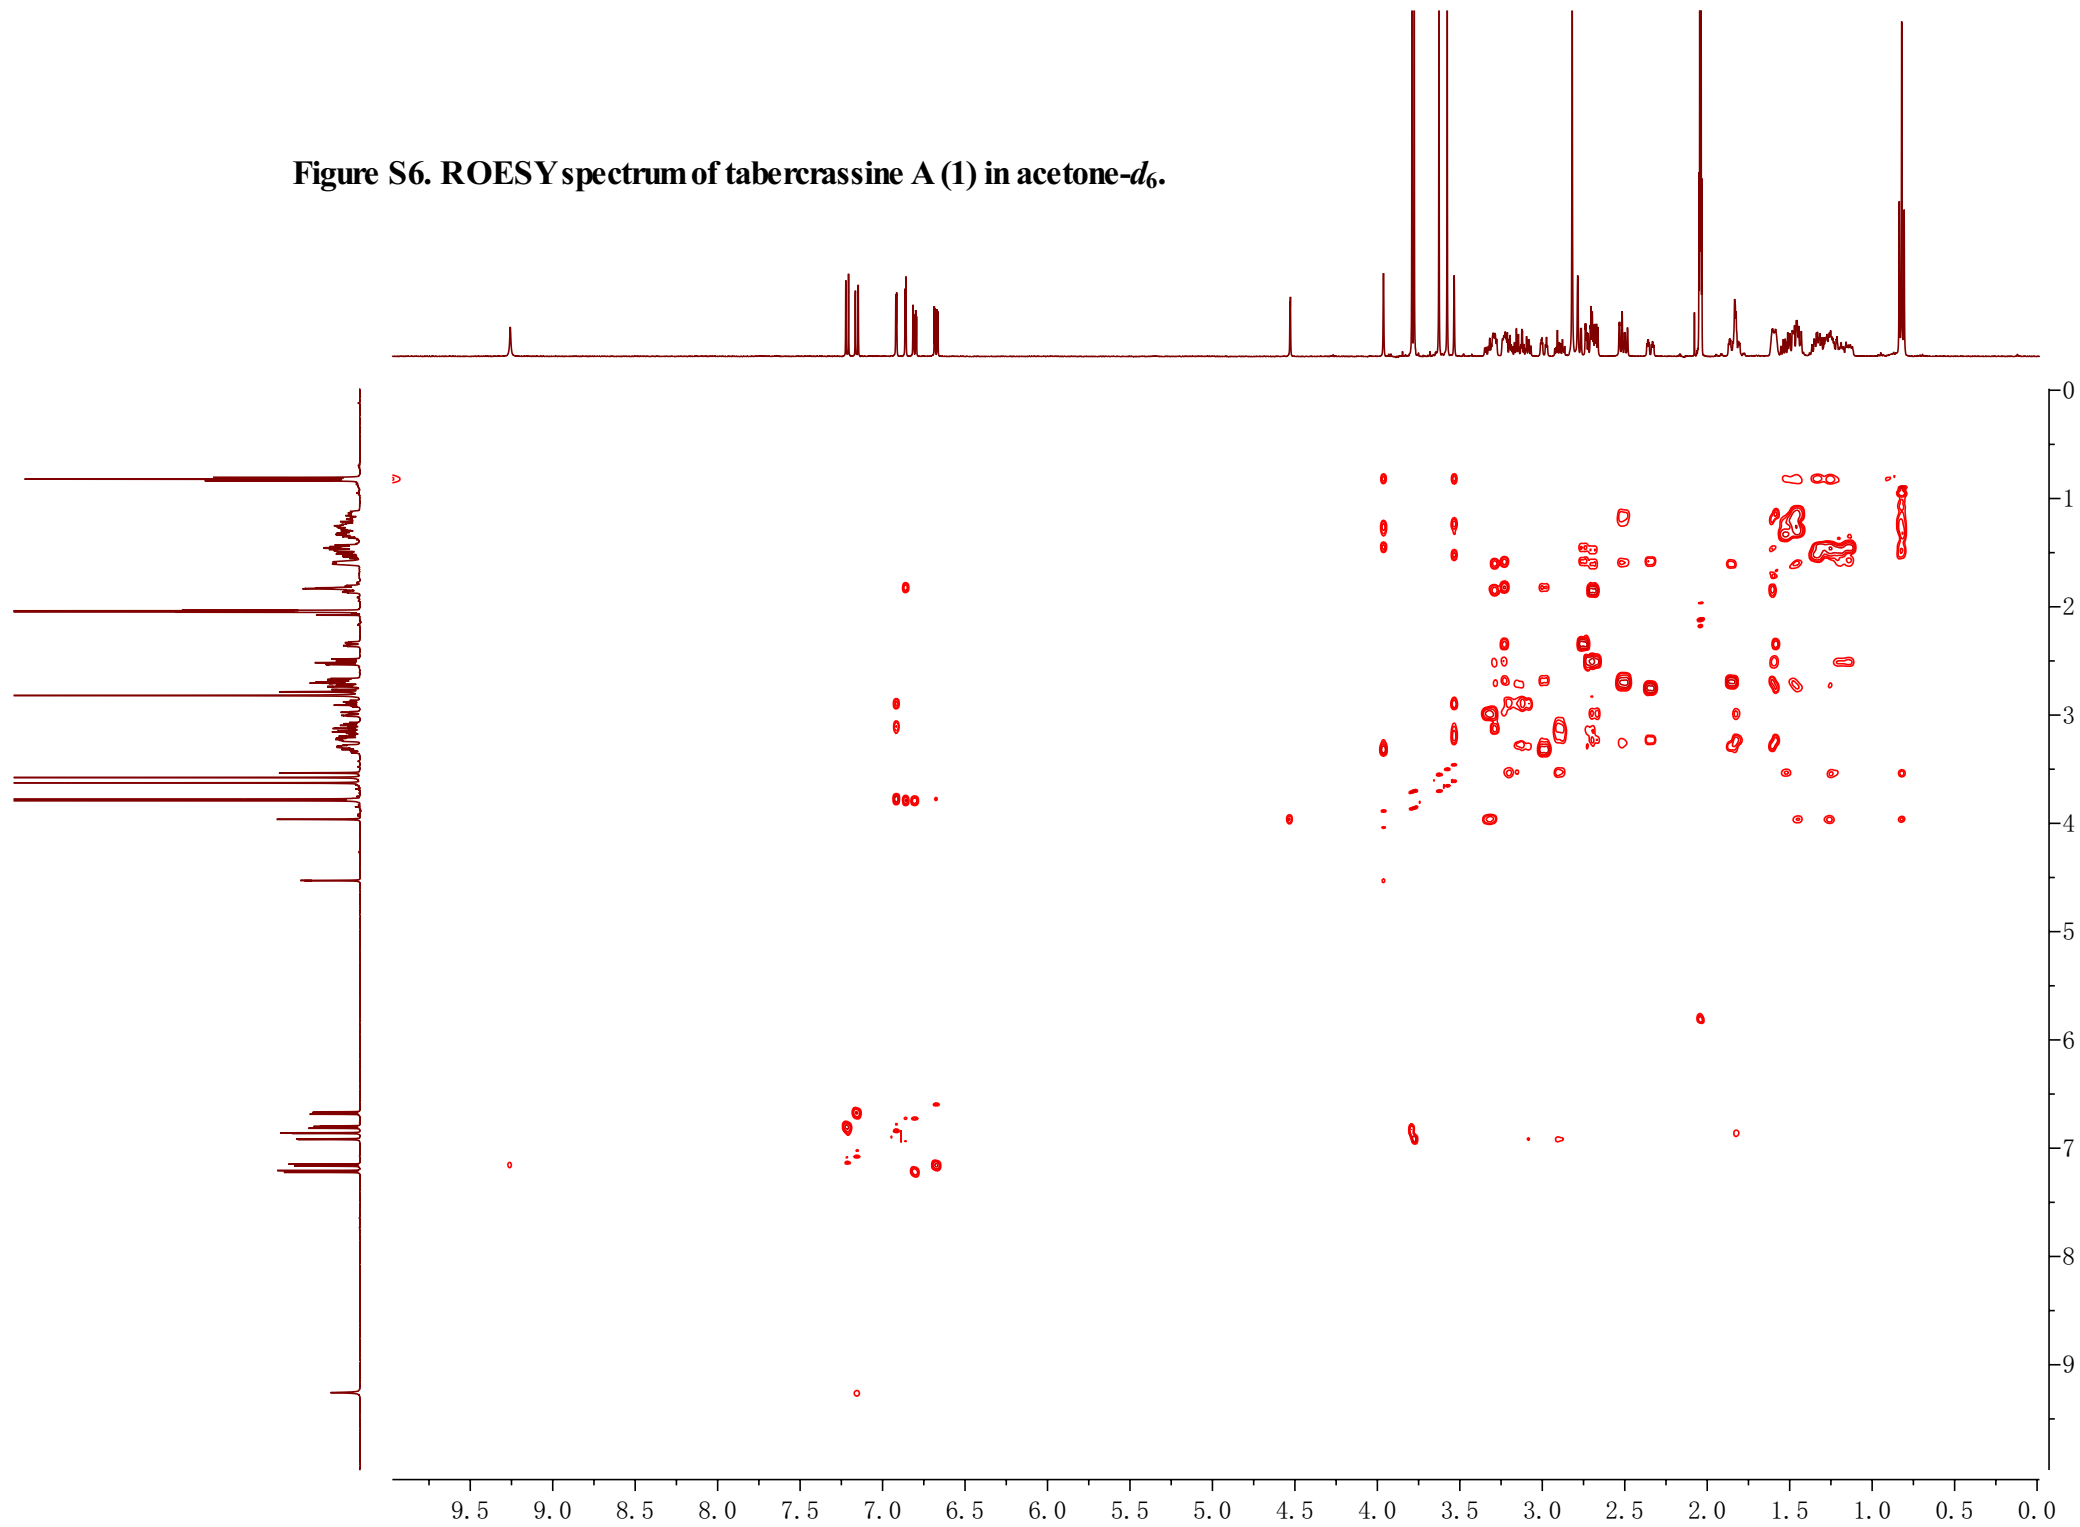

Figure S7. HRESIMS spectrum of tabercrassine A (1).

## Qualitative Analysis Report

|                               |              |                      |                        |
|-------------------------------|--------------|----------------------|------------------------|
| <b>Data Filename</b>          | har-30.d     | <b>Sample Name</b>   | har-30                 |
| <b>Sample Type</b>            | Sample       | <b>Position</b>      | P1-A1                  |
| <b>Instrument Name</b>        | Instrument 1 | <b>User Name</b>     |                        |
| <b>Acq Method</b>             | s.m          | <b>Acquired Time</b> | 10/29/2021 11:29:05 AM |
| <b>IRM Calibration Status</b> | Success      | <b>DA Method</b>     | PCDL.m                 |
| <b>Comment</b>                |              |                      |                        |

|                       |                             |
|-----------------------|-----------------------------|
| <b>Sample Group</b>   | <b>Info.</b>                |
| <b>Acquisition SW</b> | 6200 series TOF/6500 series |
| <b>Version</b>        | Q-TOF B.05.01 (B5125.2)     |

### User Spectra

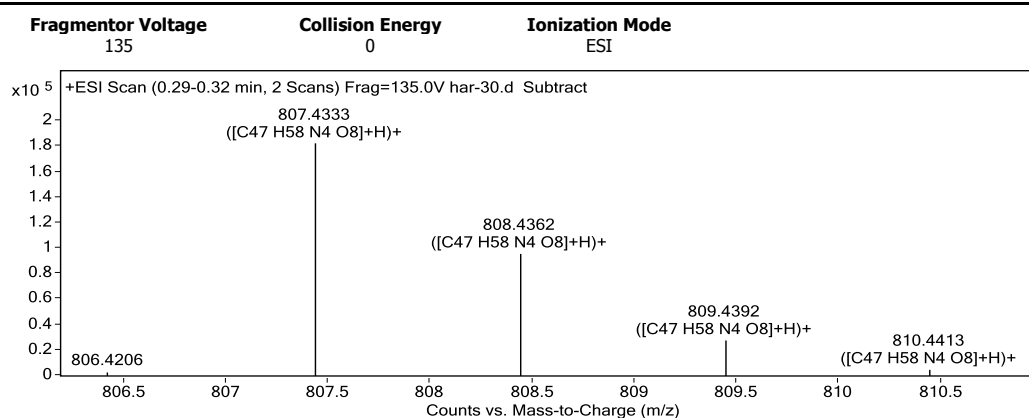

### Peak List

| m/z       | z | Abund     | Formula       | Ion    |
|-----------|---|-----------|---------------|--------|
| 367.2016  | 1 | 10311.38  |               |        |
| 771.3747  | 1 | 8700.73   |               |        |
| 807.4333  | 1 | 182429.08 | C47 H58 N4 O8 | (M+H)+ |
| 808.4362  | 1 | 95920.03  | C47 H58 N4 O8 | (M+H)+ |
| 809.4392  | 1 | 27782.27  | C47 H58 N4 O8 | (M+H)+ |
| 829.4141  | 1 | 28192.25  |               |        |
| 830.4182  | 1 | 13699.01  |               |        |
| 1613.8591 | 1 | 33356.17  |               |        |
| 1614.8623 | 1 | 35436.36  |               |        |
| 1615.8654 | 1 | 18511.27  |               |        |

### Formula Calculator Element Limits

| Element | Min | Max |
|---------|-----|-----|
| C       | 3   | 60  |
| H       | 0   | 200 |
| O       | 0   | 10  |
| N       | 0   | 5   |

### Formula Calculator Results

| Formula       | CalculatedMass | CalculatedMz | Mz       | Diff. (mDa) | Diff. (ppm) | DBE     |
|---------------|----------------|--------------|----------|-------------|-------------|---------|
| C47 H58 N4 O8 | 806.4255       | 807.4327     | 807.4333 | -0.60       | -0.74       | 21.0000 |

--- End Of Report ---

Figure S8. IR spectrum of tabercrassine A (1).

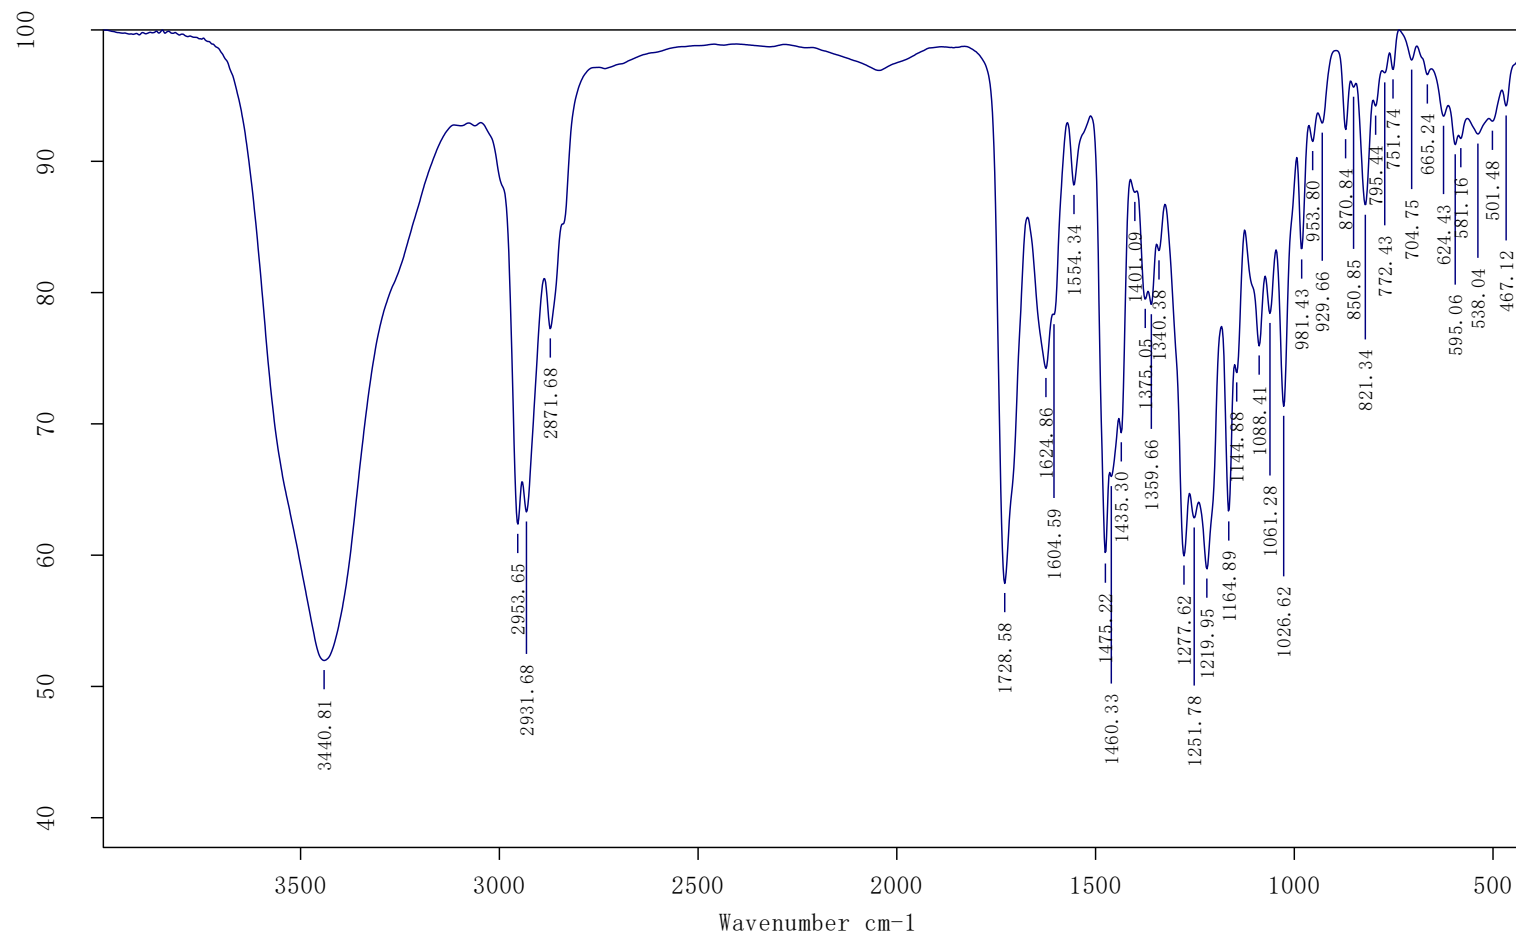

Sample Name: har-30

Sample Form: KBr

Path of File: E:\data

Date of Measurement: 2022/9/7

Resolution: 4

Aperture Setting: 6 mm

Number of Background Scans: 16

Number of Sample Scans: 16

Beamsplitter Setting: KBr

Source Setting: MIR

Instrument Type: BRUKER VERTEX 70

Soft Version: OPUS8.1

Figure S9. ECD spectrum of tabercrassine A (1) in MeOH.

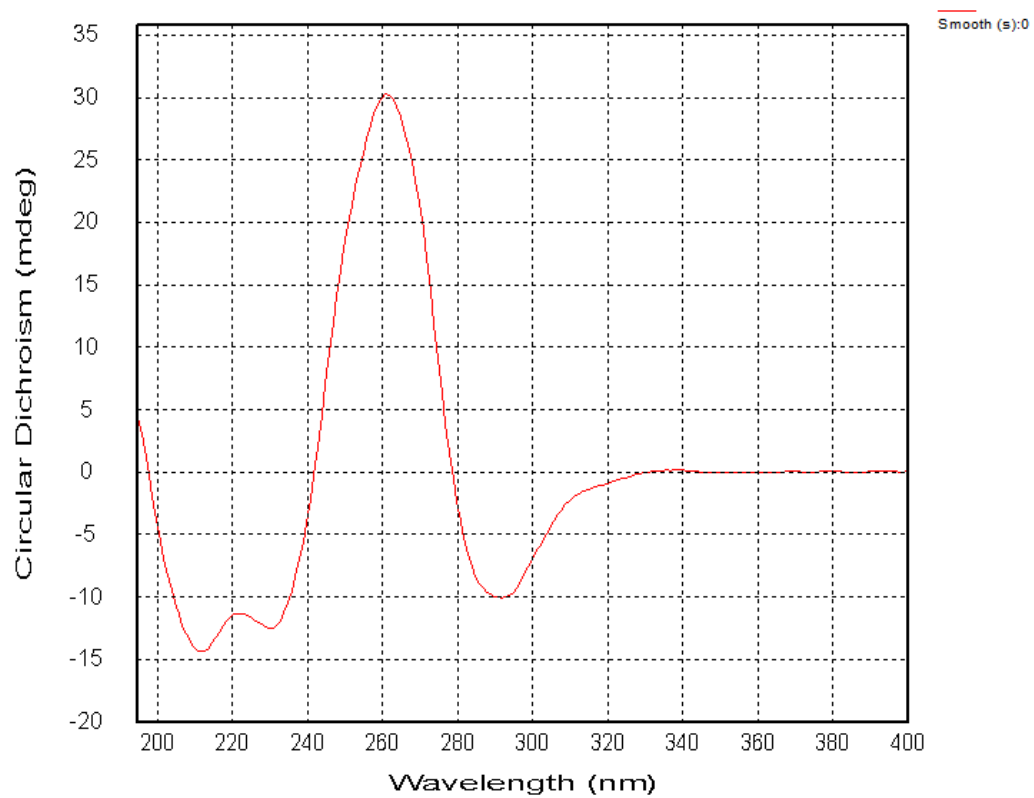

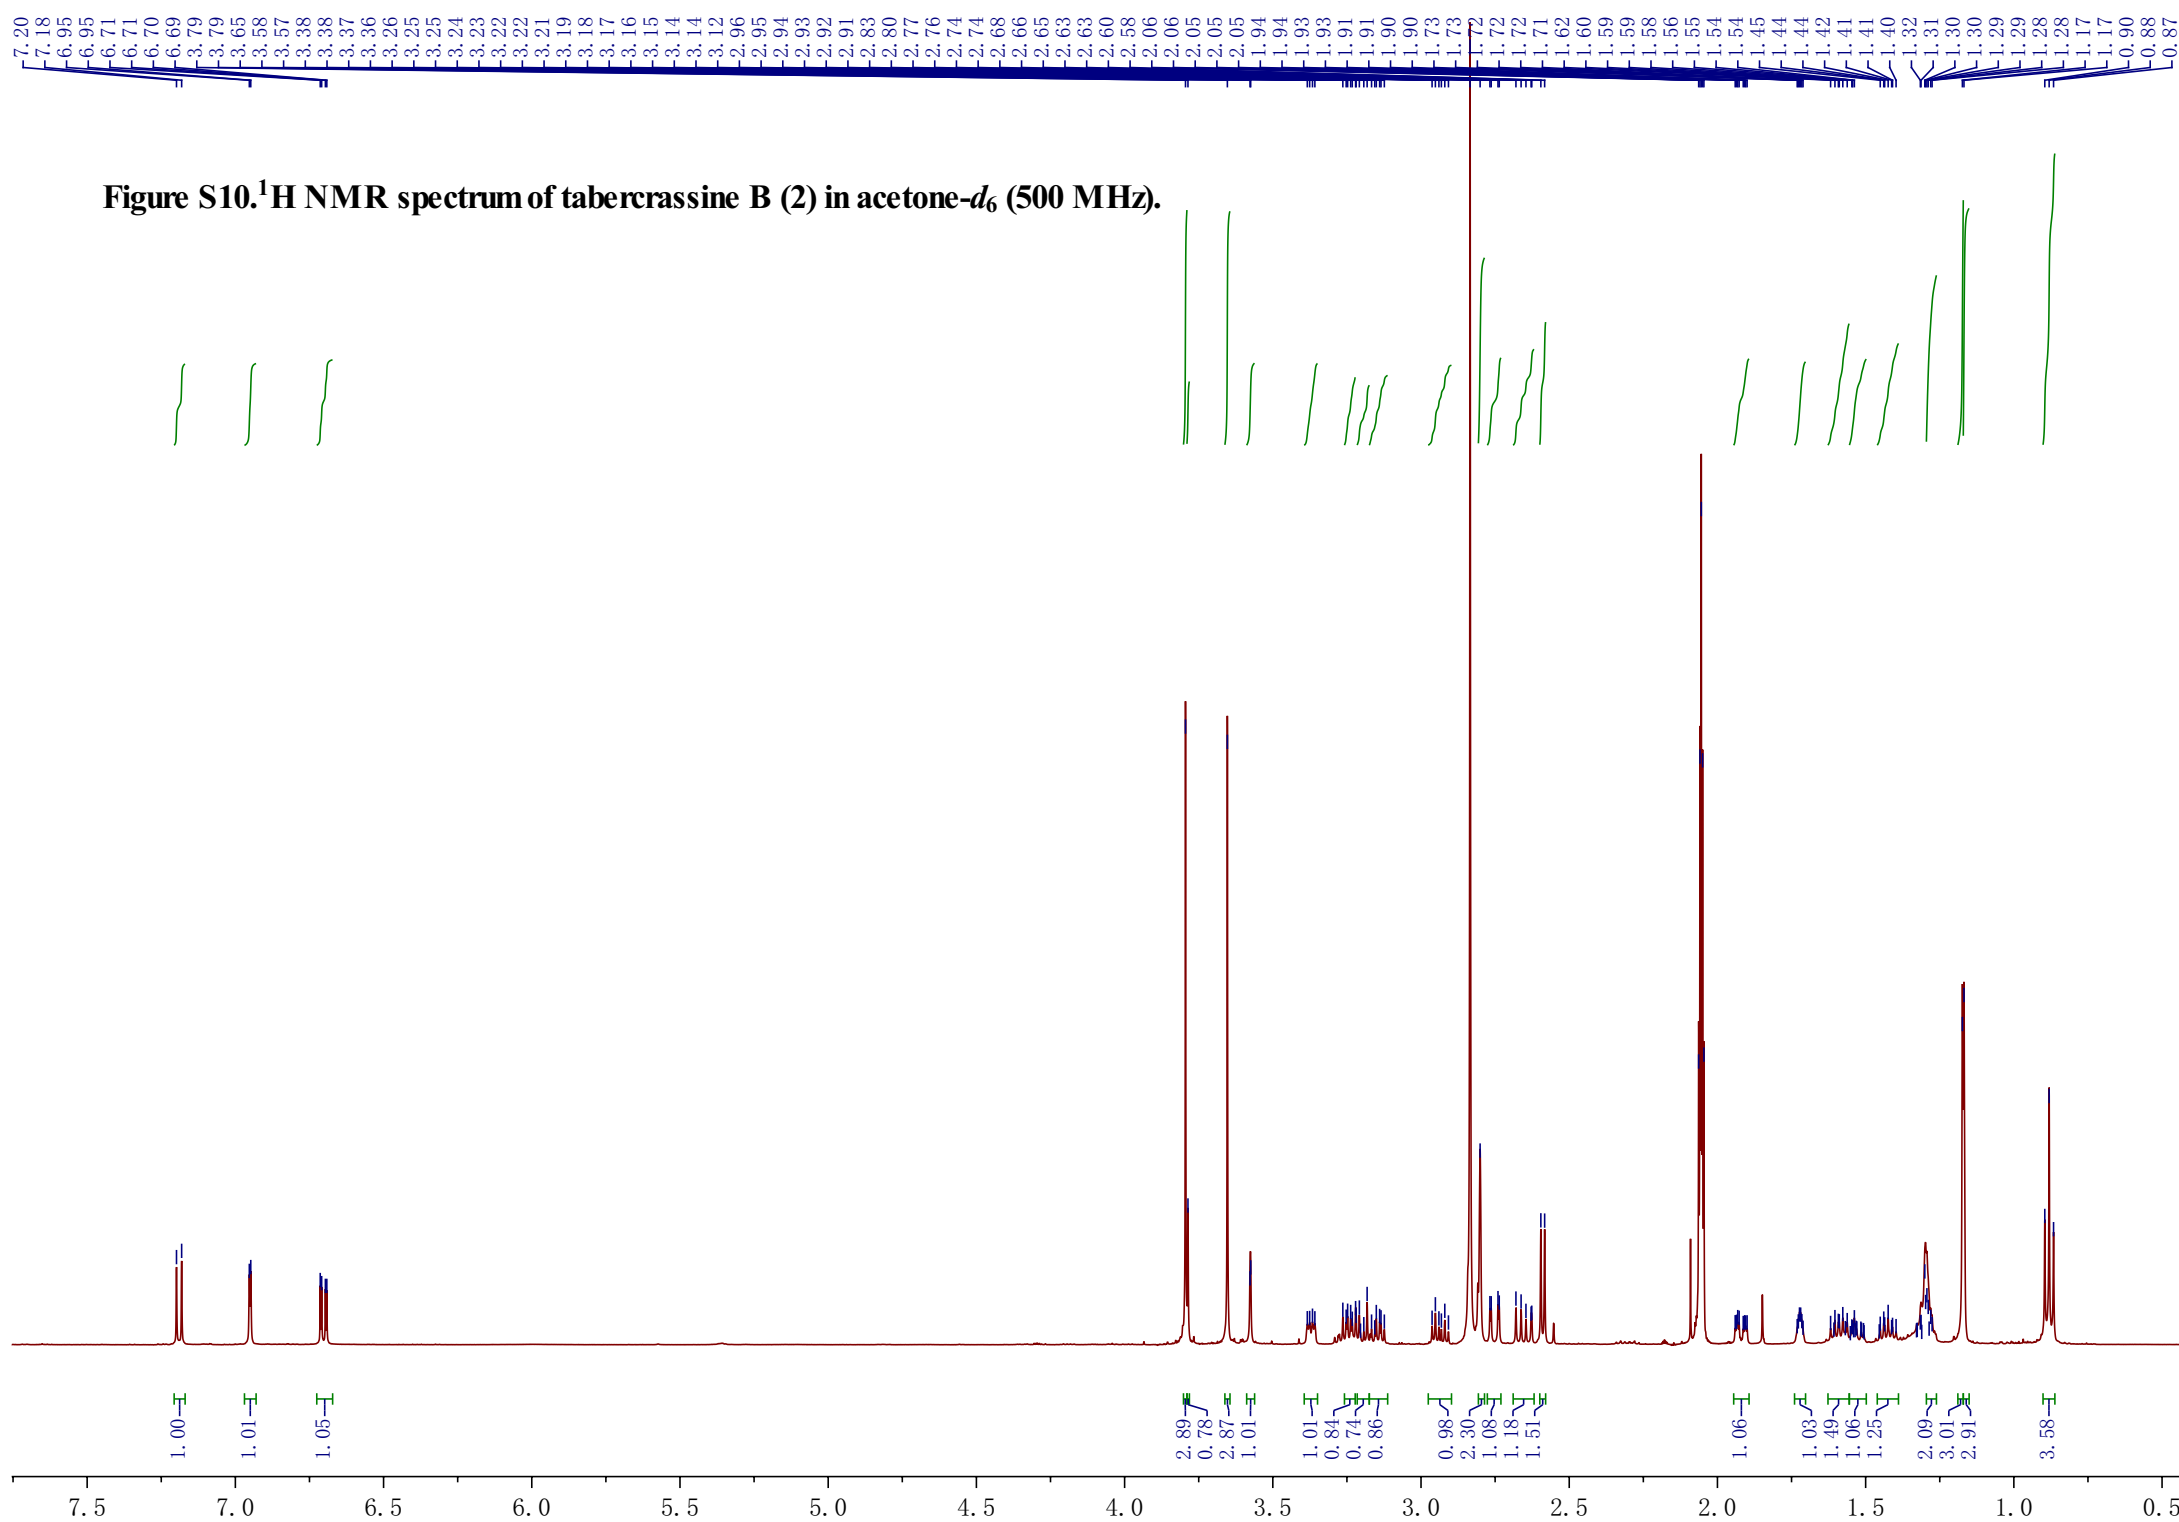

Figure S11.  $^{13}\text{C}$  NMR spectrum of taberocrassine B (2) in acetone- $d_6$  (125 MHz).

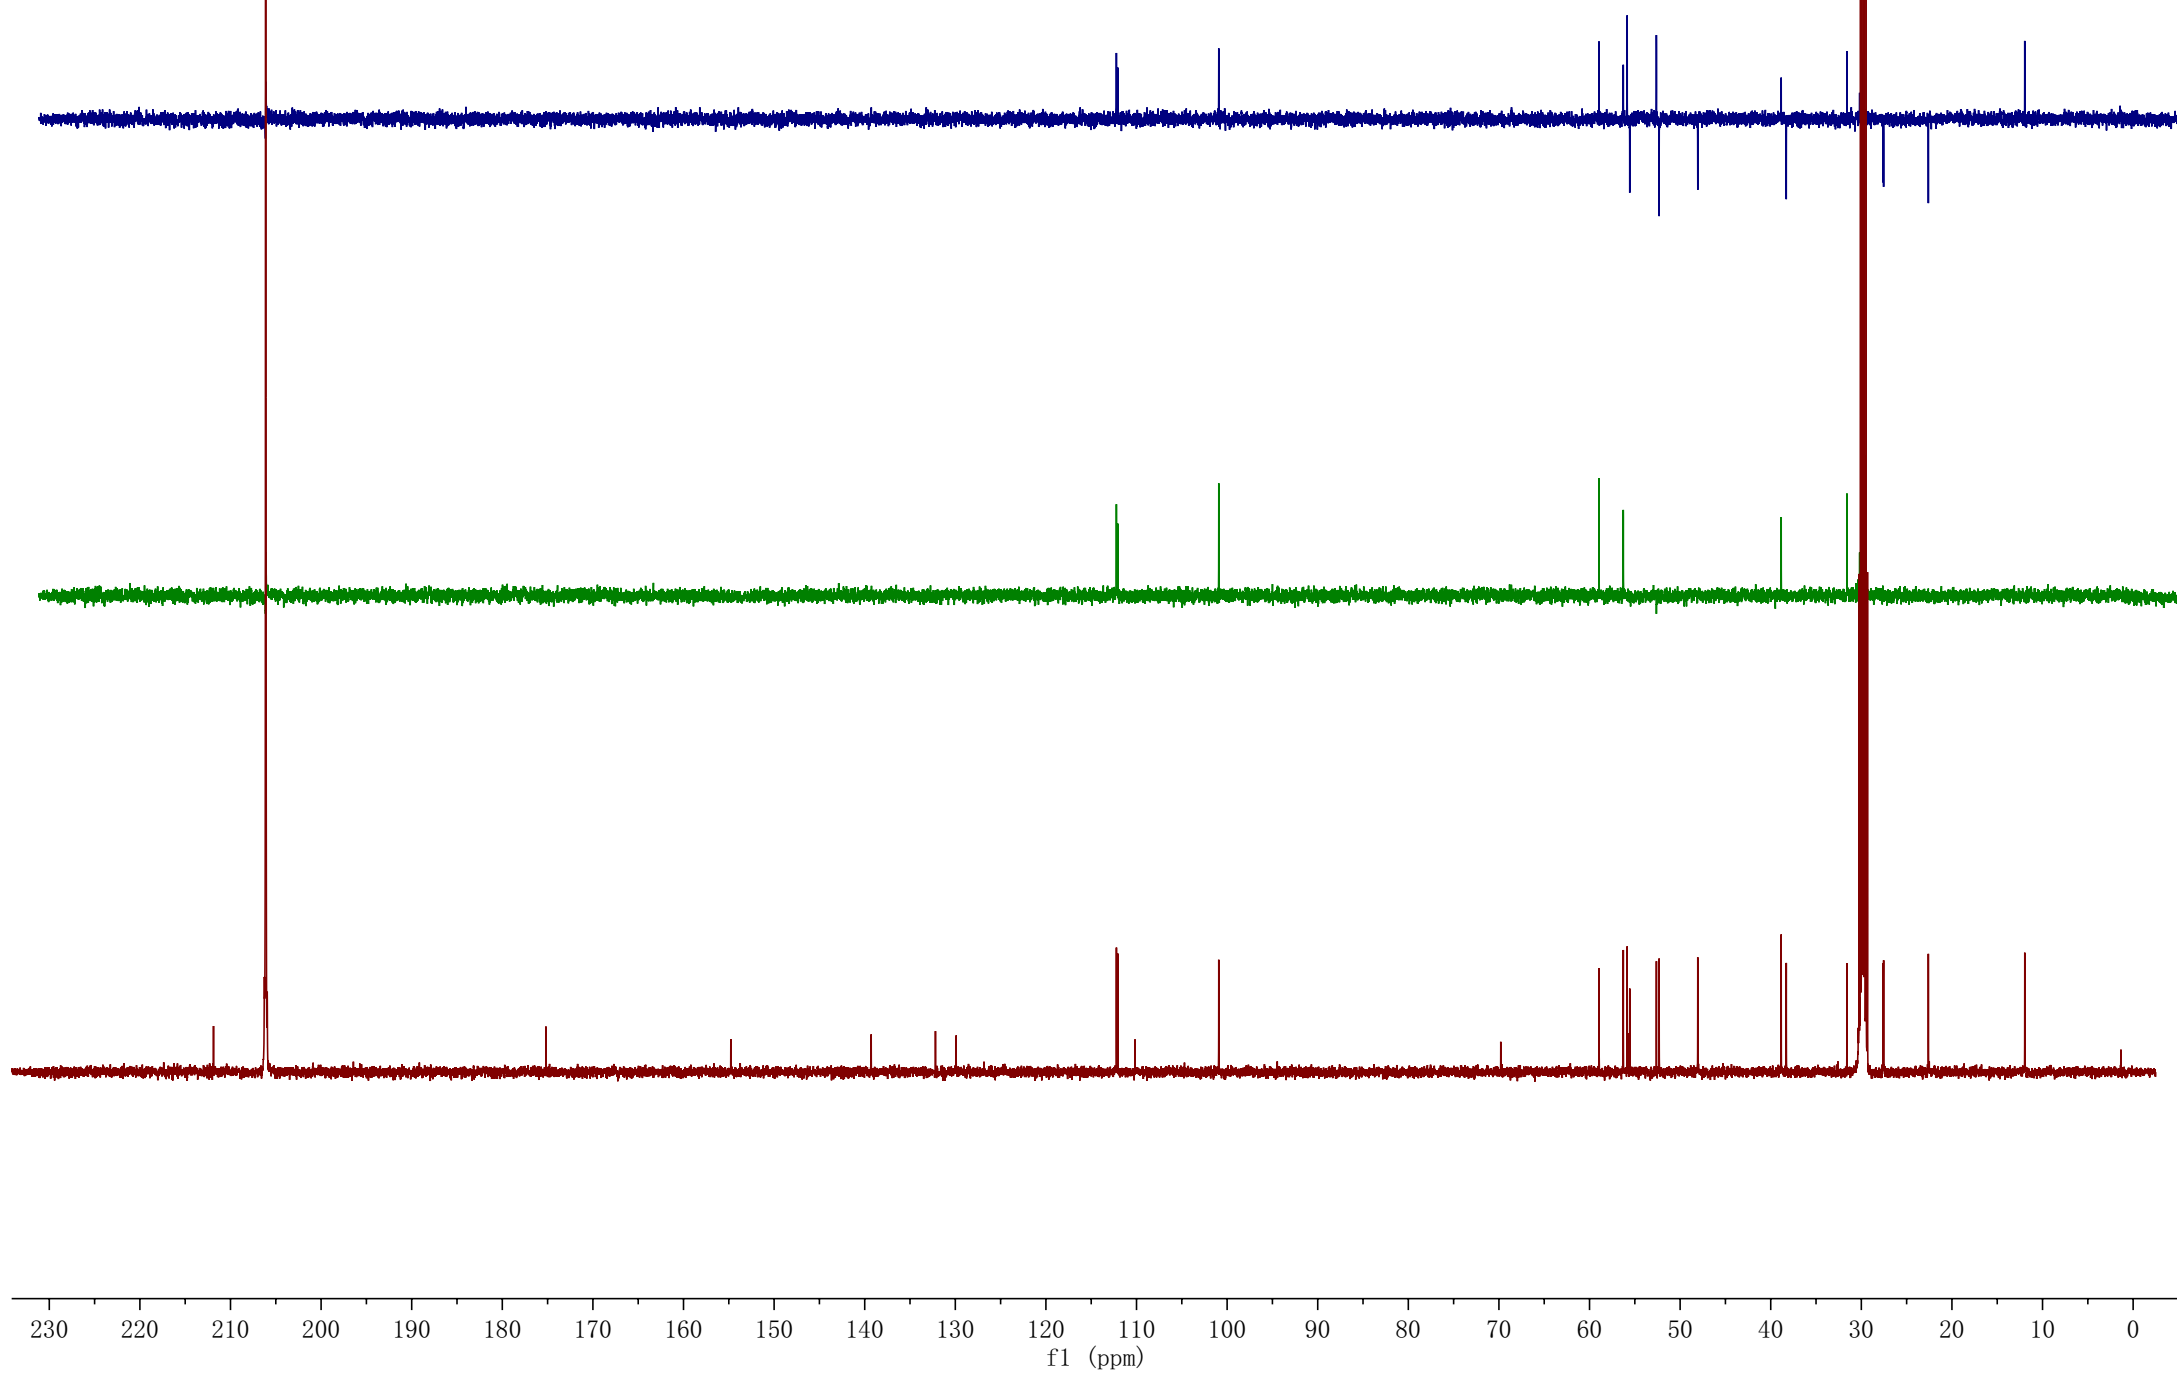

**Figure S12. HSQC spectrum of tabercrassine B (2) in acetone- $d_6$ .**

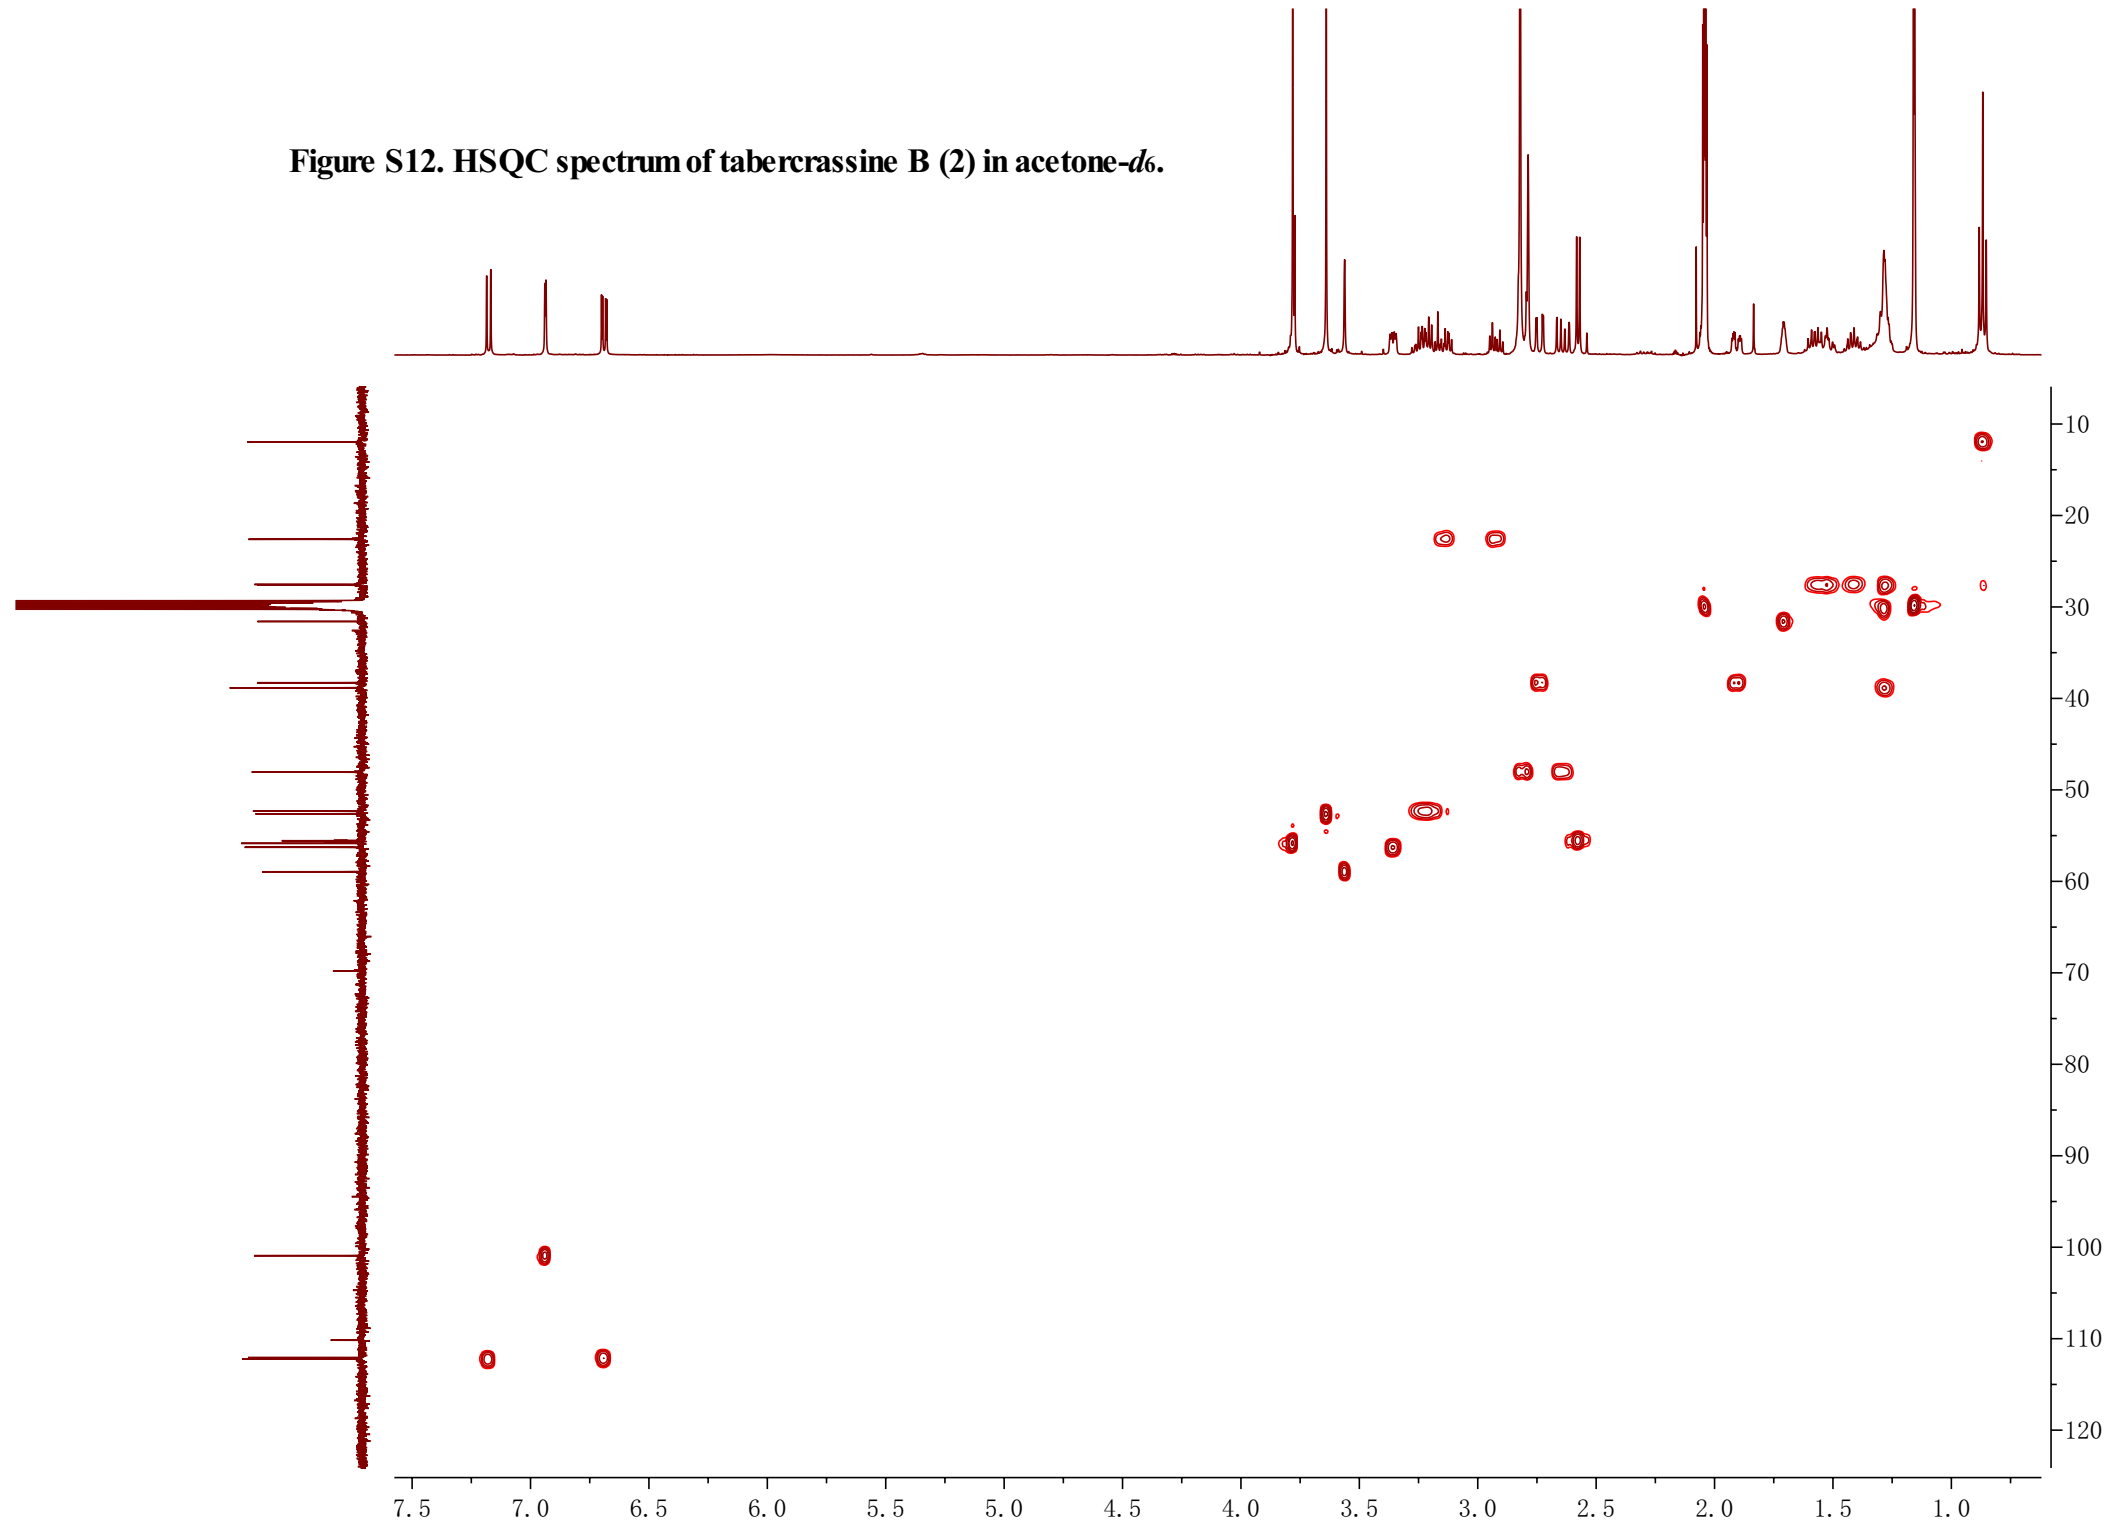



Figure S13.  $^1\text{H}$ - $^1\text{H}$  COSY spectrum of tabercrassine B (2) in acetone- $d_6$ .

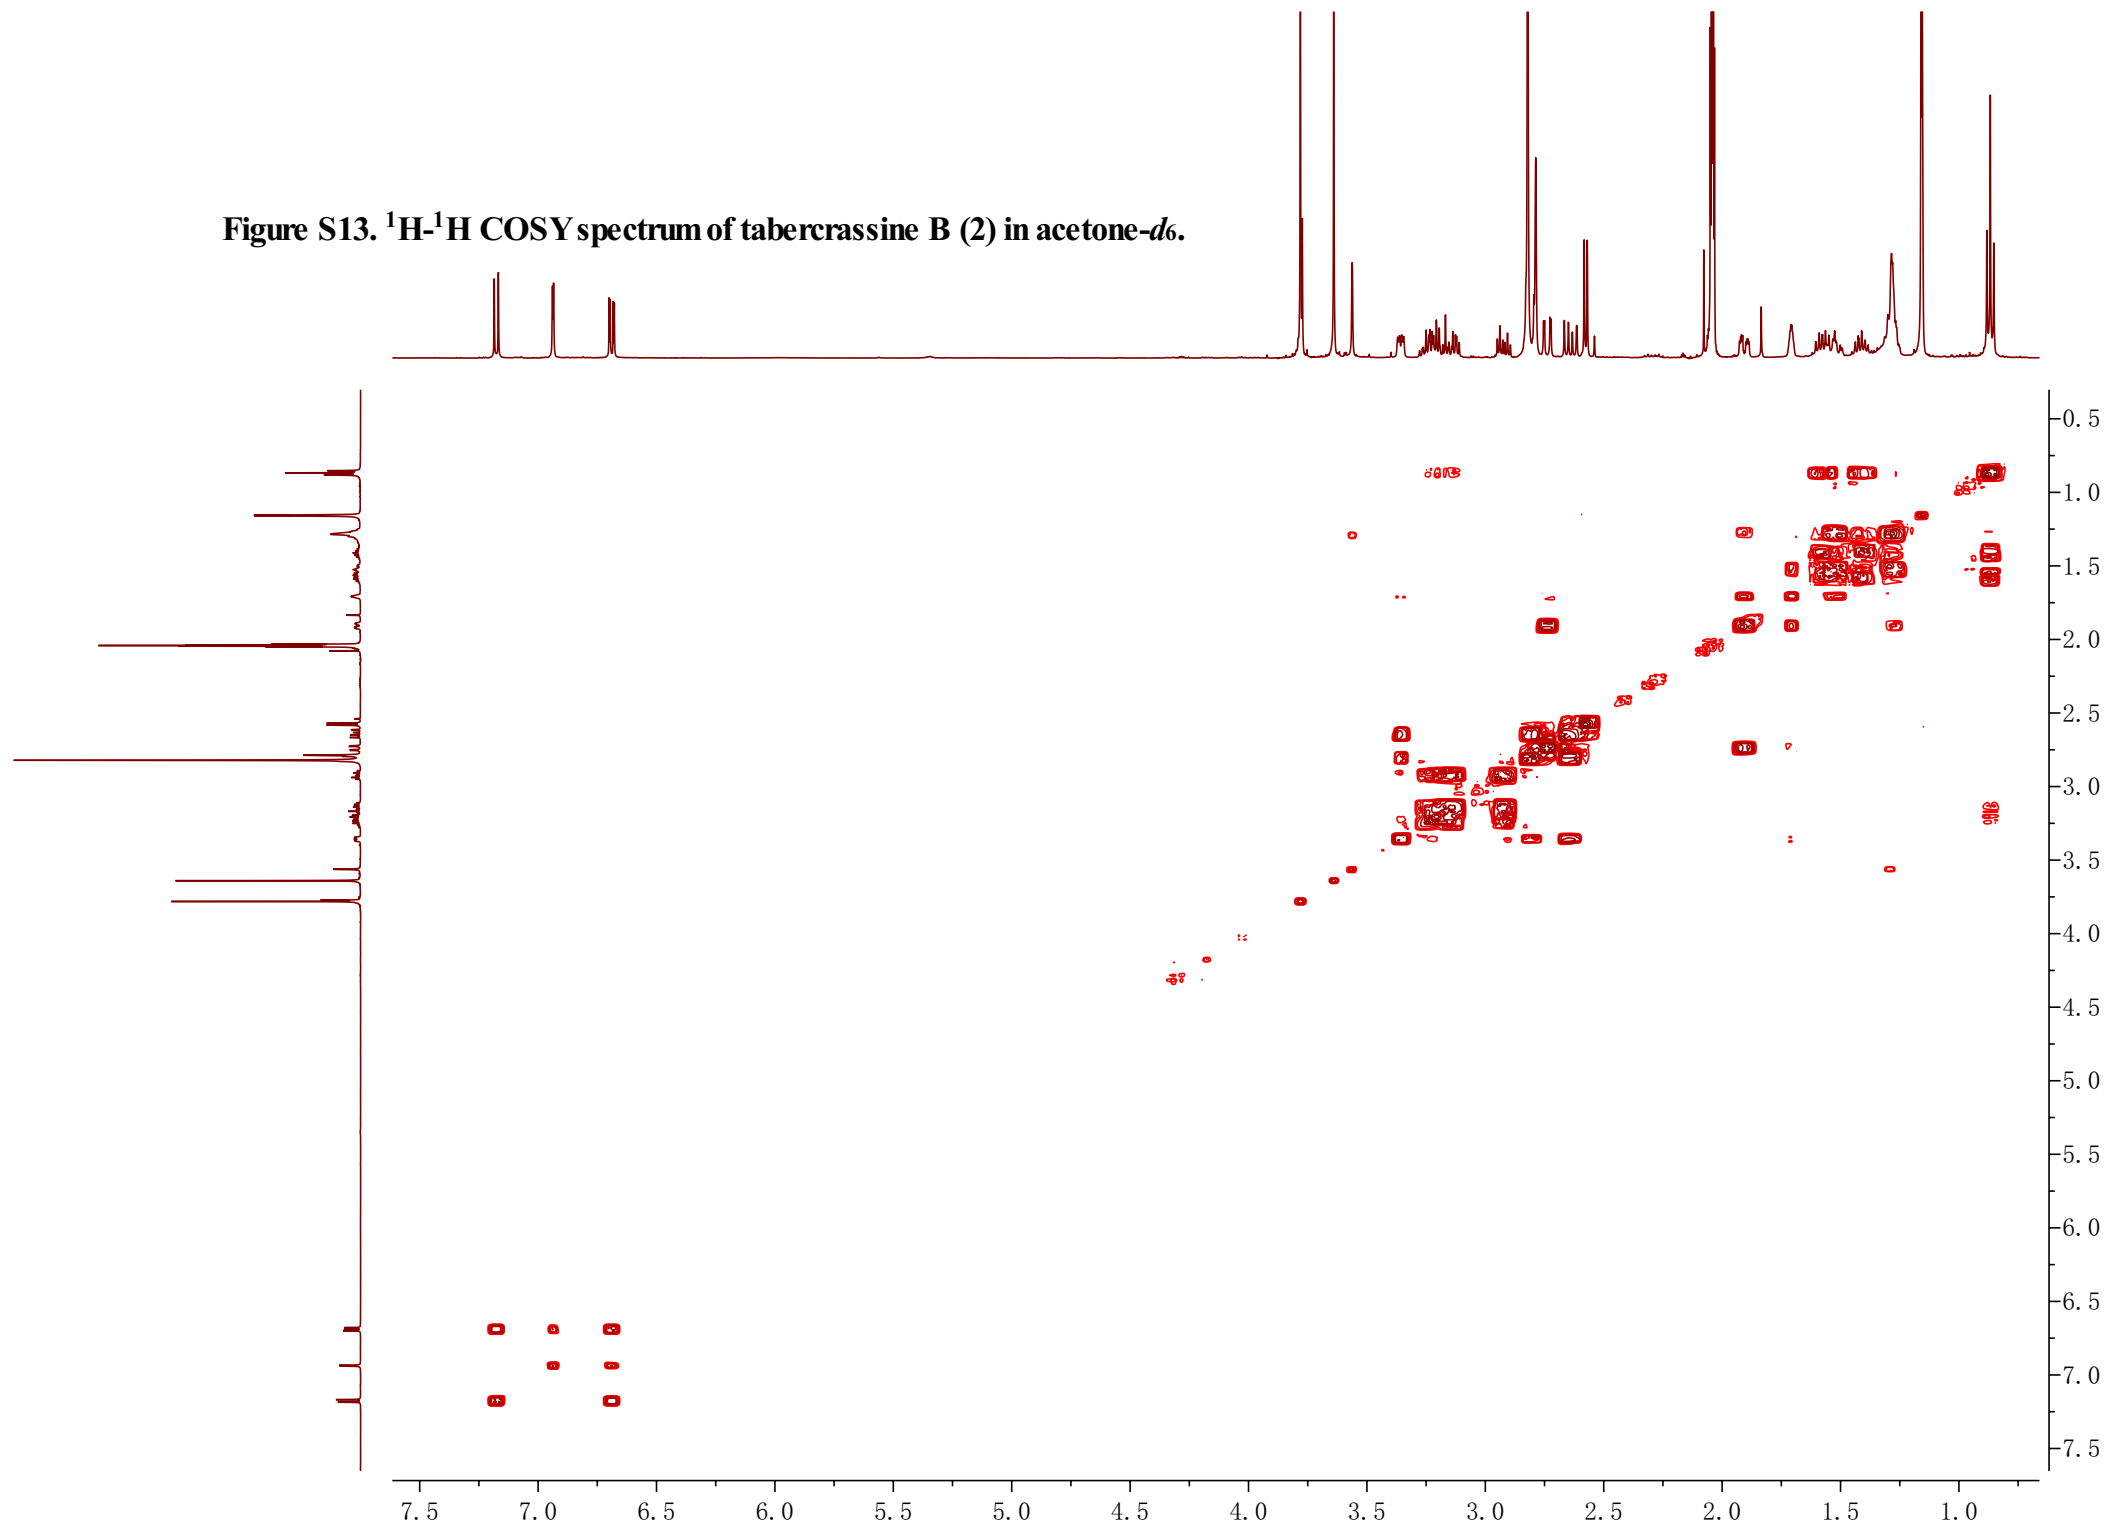

Figure S14. HMBC spectrum of tabercrassine B (2) in acetone-*d*<sub>6</sub>.

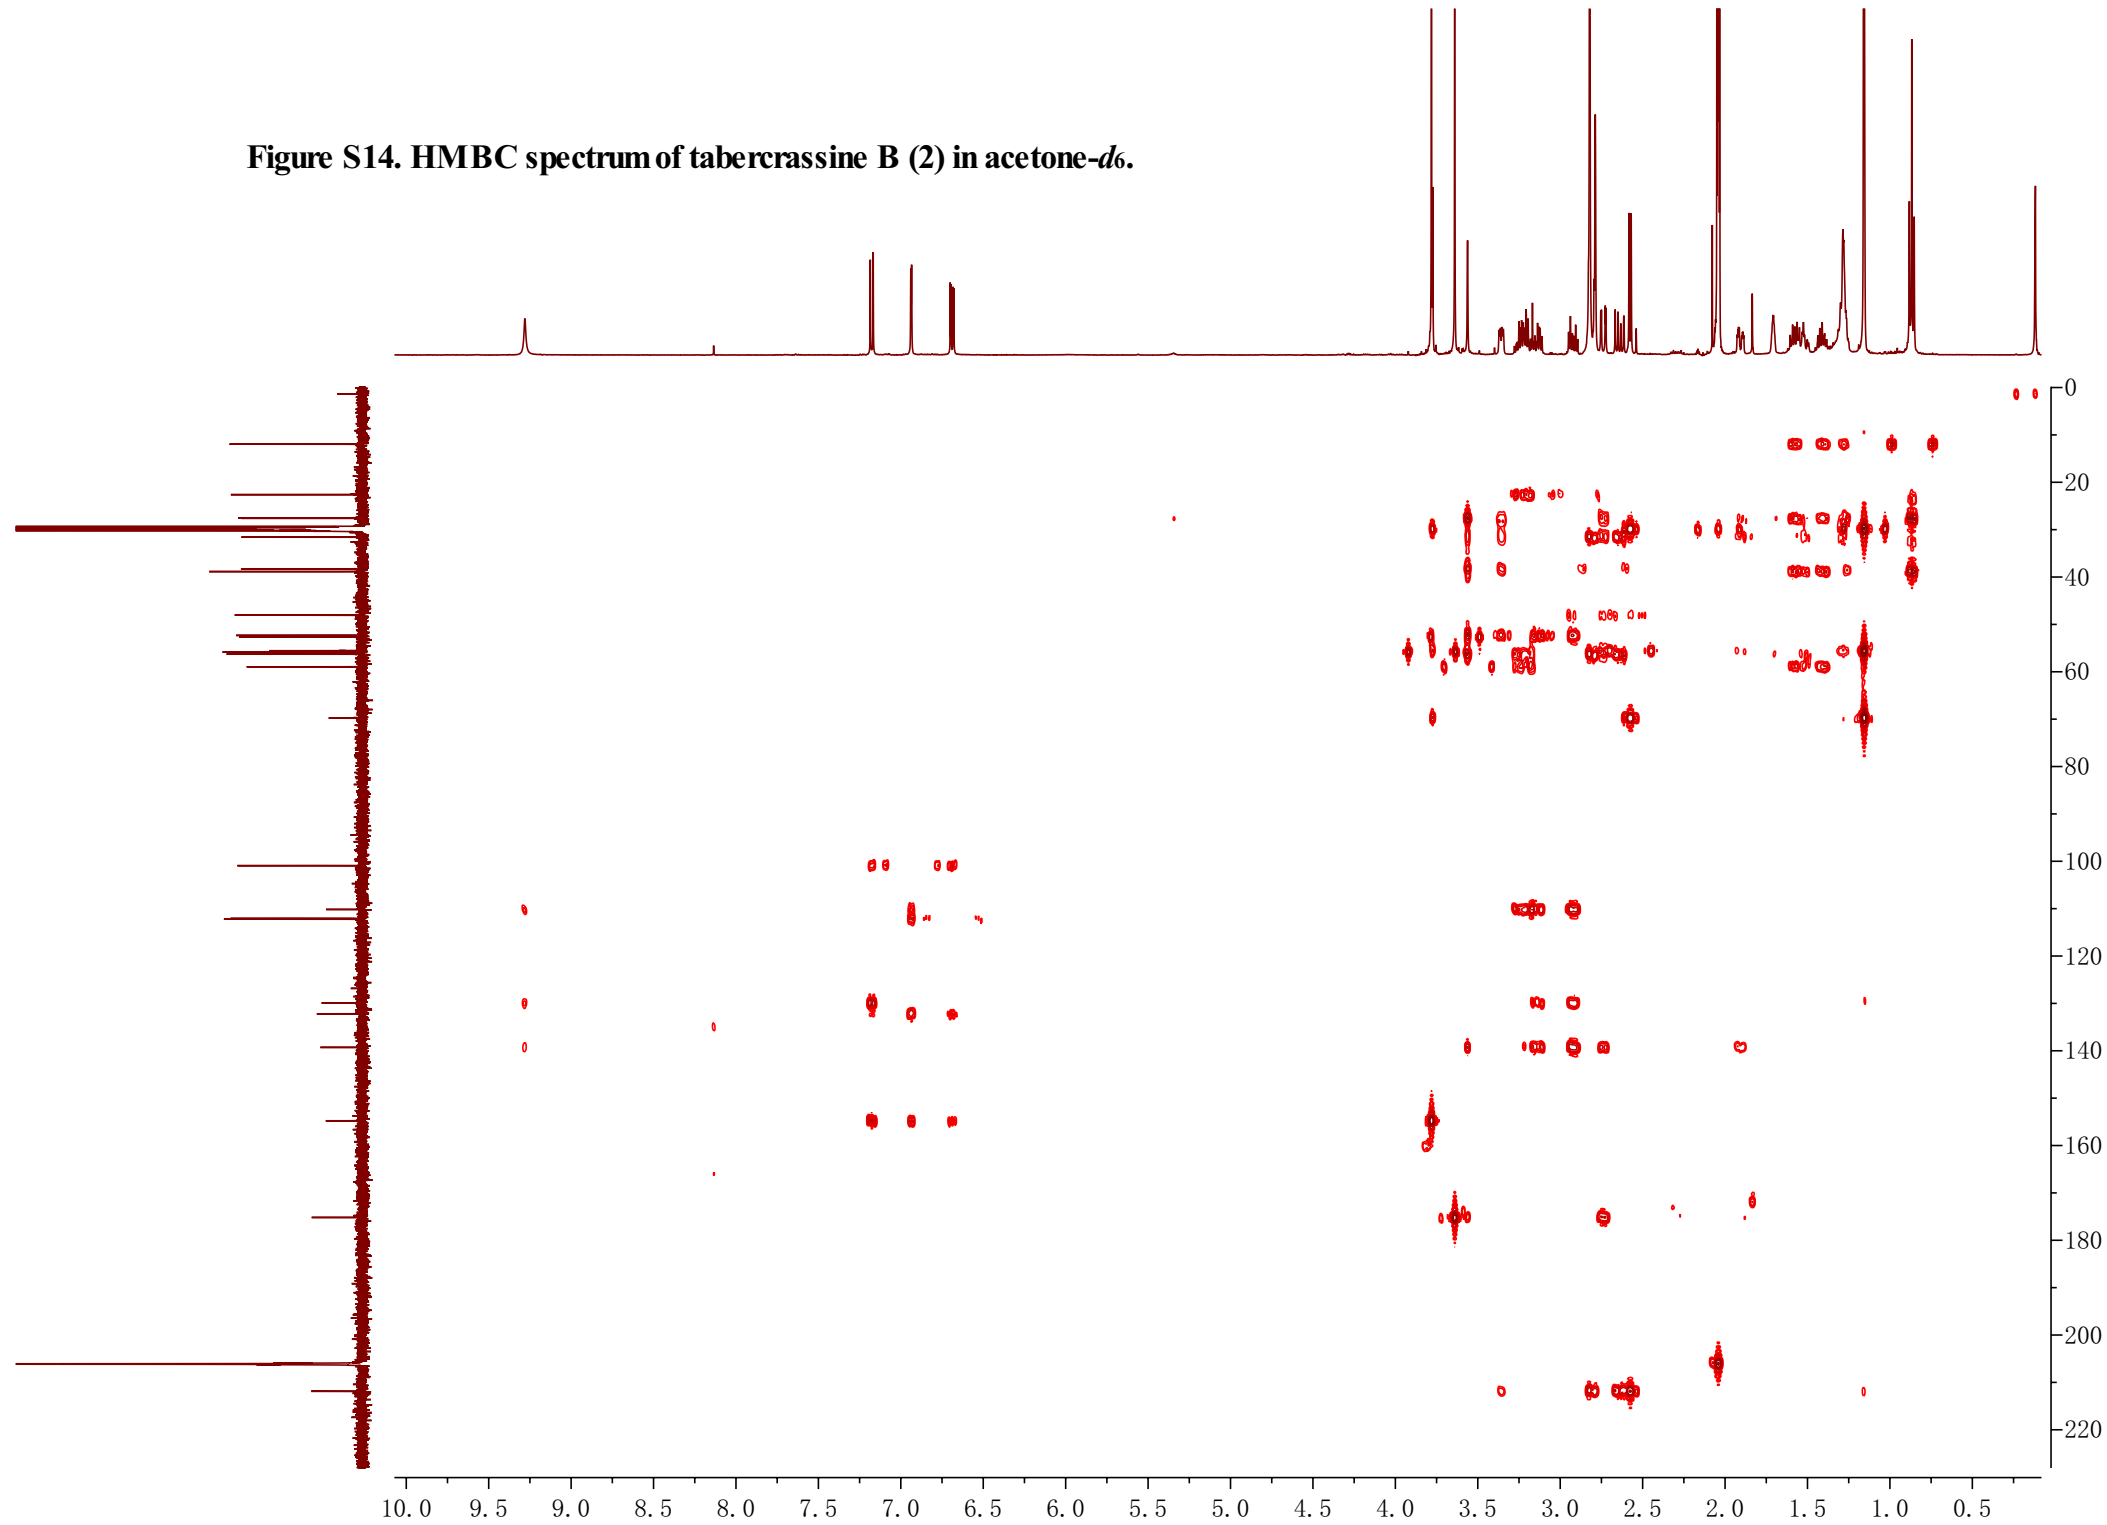

Figure S15. ROESY spectrum of taberocrassine B (2) in acetone-*d*<sub>6</sub>.

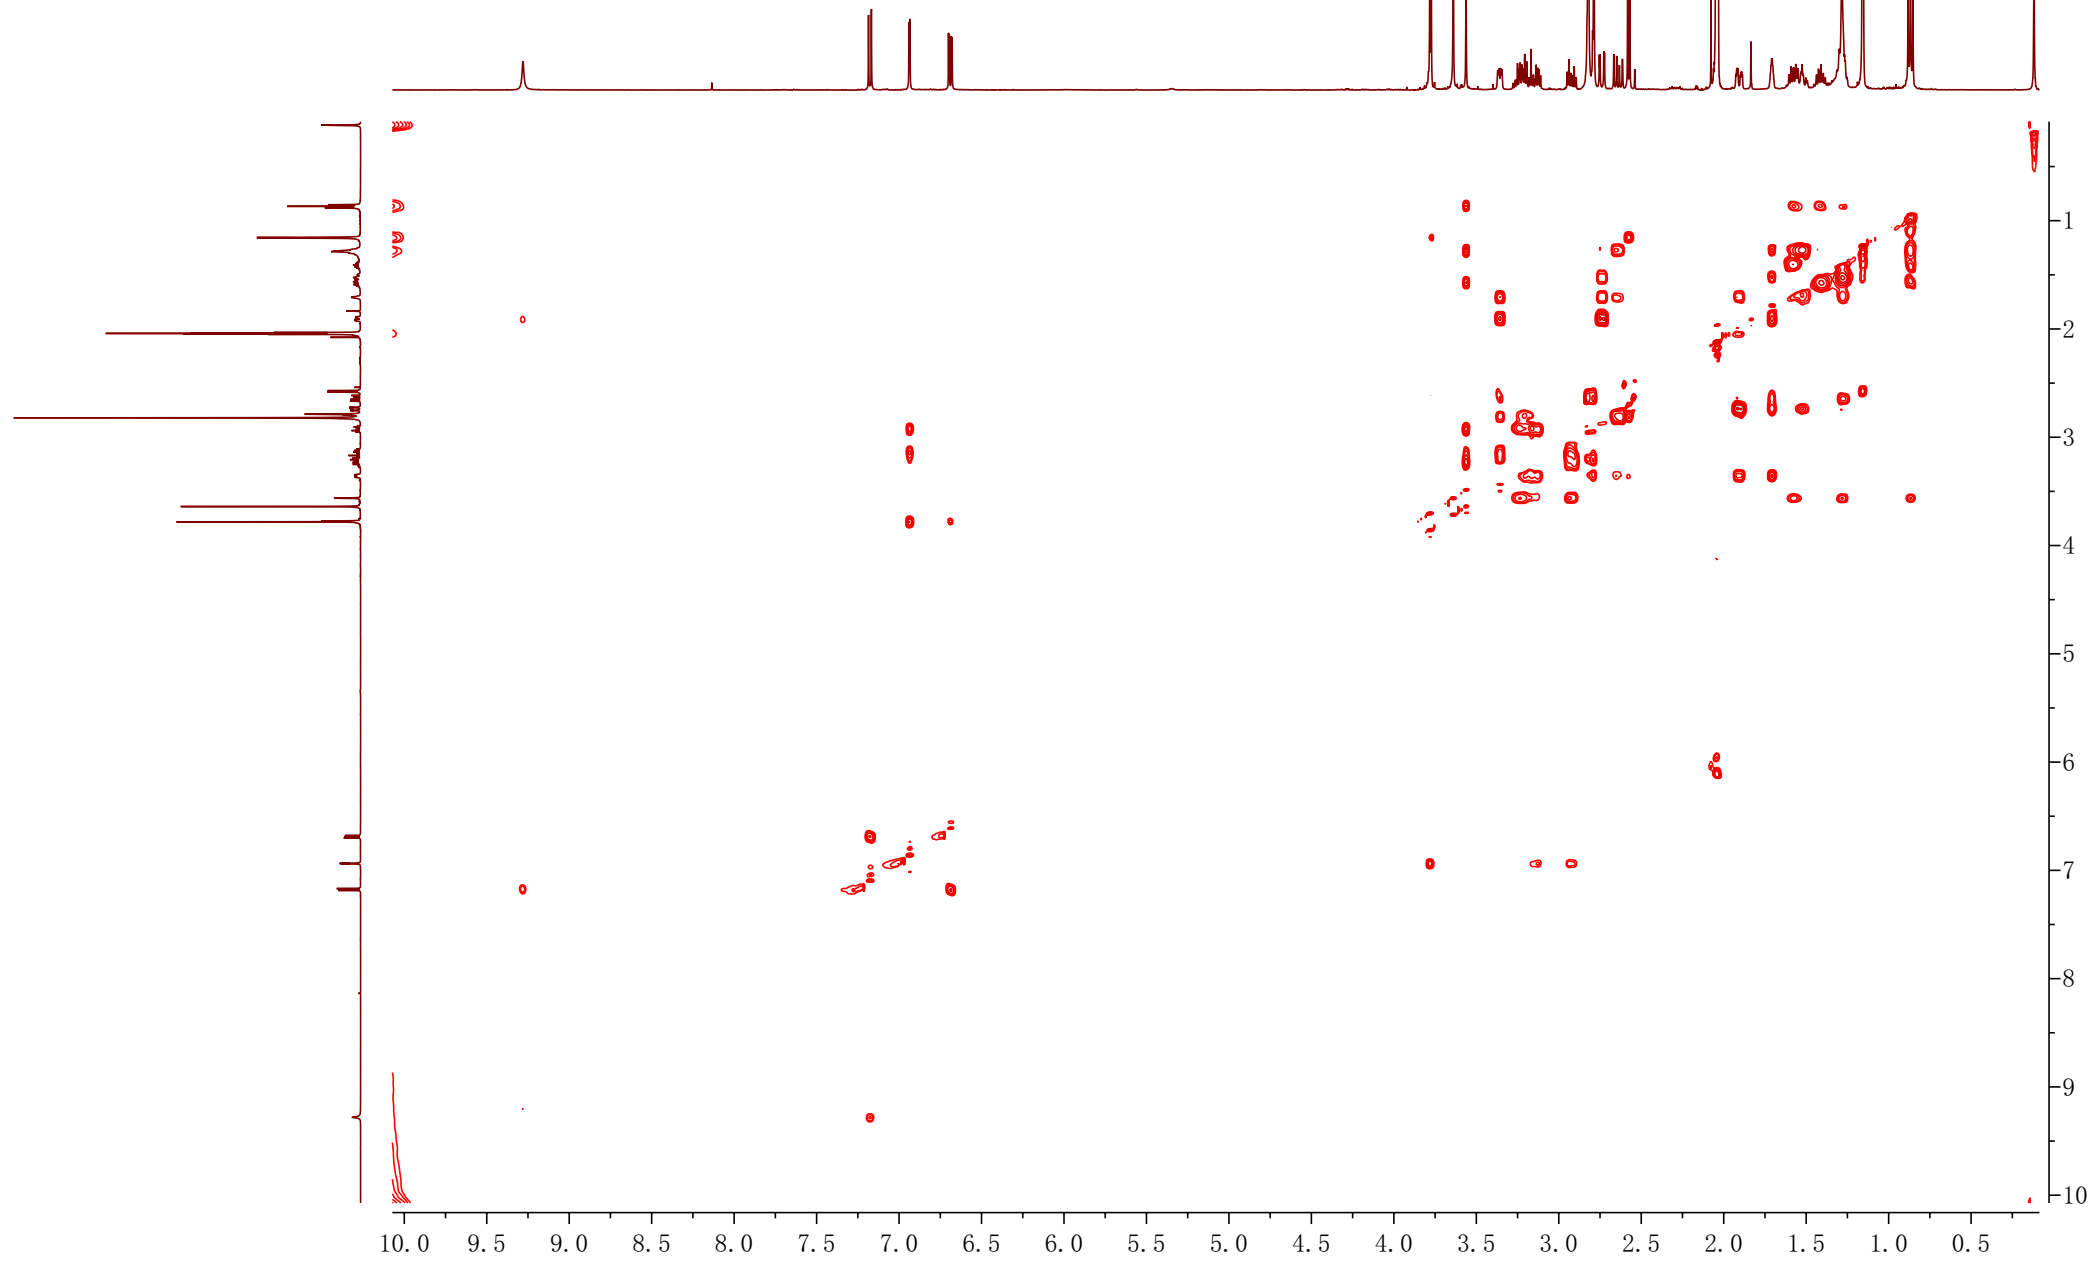

## Qualitative Analysis Report

|                               |              |                      |                       |
|-------------------------------|--------------|----------------------|-----------------------|
| <b>Data Filename</b>          | HAR-27.d     | <b>Sample Name</b>   | HAR-27                |
| <b>Sample Type</b>            | Sample       | <b>Position</b>      | P1-B2                 |
| <b>Instrument Name</b>        | Instrument 1 | <b>User Name</b>     |                       |
| <b>Acq Method</b>             | s.m          | <b>Acquired Time</b> | 11/8/2021 10:58:15 AM |
| <b>IRM Calibration Status</b> | Success      | <b>DA Method</b>     | PCDL.m                |
| <b>Comment</b>                |              |                      |                       |

|                       |                             |              |
|-----------------------|-----------------------------|--------------|
| <b>Sample Group</b>   |                             | <b>Info.</b> |
| <b>Acquisition SW</b> | 6200 series TOF/6500 series |              |
| <b>Version</b>        | Q-TOF B.05.01 (B5125.2)     |              |

### User Spectra

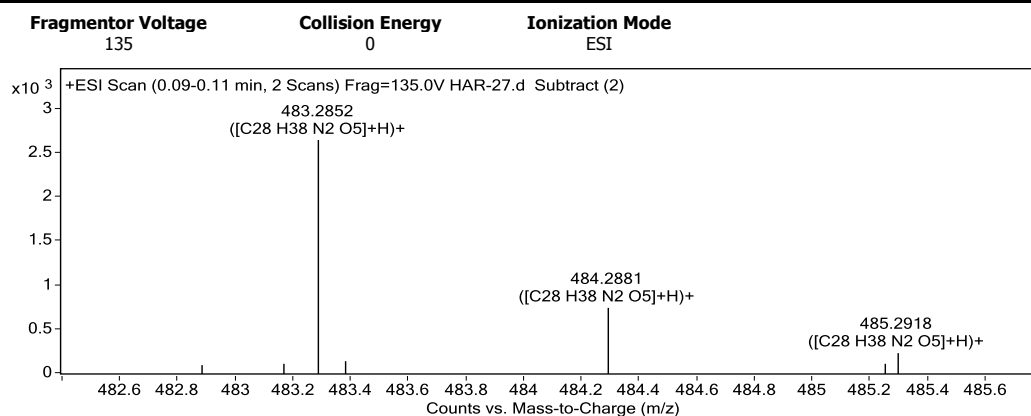

### Peak List

| m/z      | z | Abund   | Formula       | Ion    |
|----------|---|---------|---------------|--------|
| 81.9374  | 1 | 570.76  |               |        |
| 95.9531  | 1 | 525.11  |               |        |
| 120.9682 | 1 | 561.94  |               |        |
| 150.1117 | 1 | 898.52  |               |        |
| 153.9787 | 1 | 909.54  |               |        |
| 155.9739 | 1 | 1869.38 |               |        |
| 223.1231 | 1 | 881.61  |               |        |
| 264.9387 | 1 | 539.6   |               |        |
| 483.2852 | 1 | 2651.76 | C28 H38 N2 O5 | (M+H)+ |
| 484.2881 | 1 | 750.06  | C28 H38 N2 O5 | (M+H)+ |

### Formula Calculator Element Limits

| Element | Min | Max |
|---------|-----|-----|
| C       | 3   | 60  |
| H       | 0   | 120 |
| O       | 0   | 30  |
| N       | 0   | 5   |

### Formula Calculator Results

| Formula       | CalculatedMass | CalculatedMz | Mz       | Diff. (mDa) | Diff. (ppm) | DBE     |
|---------------|----------------|--------------|----------|-------------|-------------|---------|
| C28 H38 N2 O5 | 482.2781       | 483.2853     | 483.2852 | 0.10        | 0.21        | 11.0000 |

--- End Of Report ---

Figure S17. IR spectrum of tabercrassine B (2).

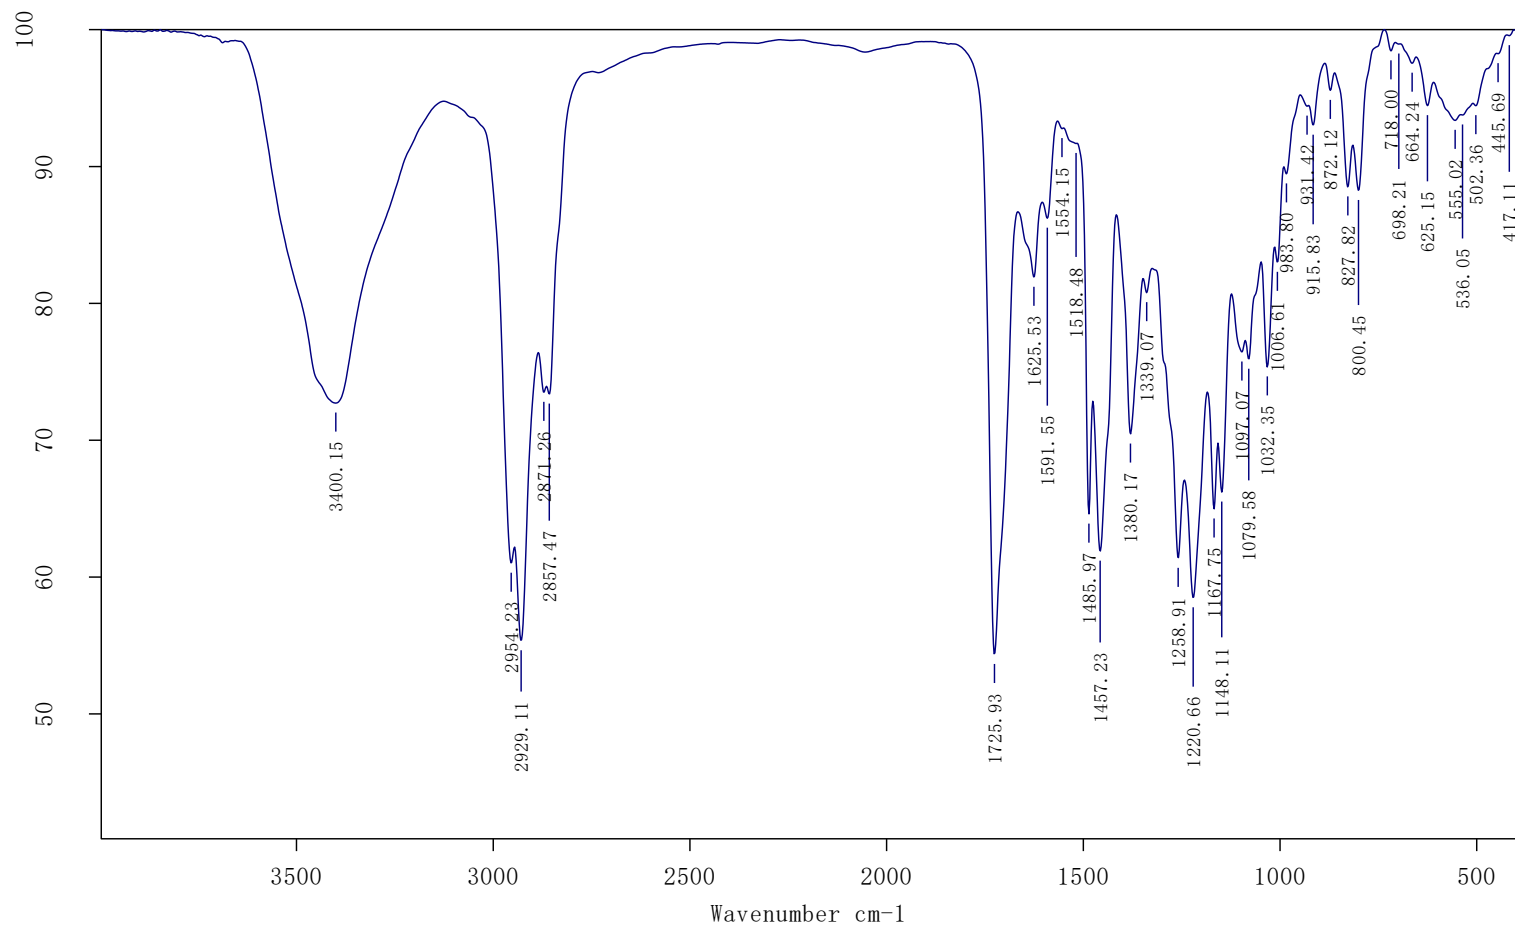

Sample Name: har-27

Sample Form: KBr

Path of File: E:\data

Date of Measurement: 2022/9/9

Resolution: 4

Aperture Setting: 6 mm

Number of Background Scans: 16

Number of Sample Scans: 16

Beamsplitter Setting: KBr

Source Setting: MIR

Instrument Type: BRUKER VERTEX 70

Soft Version: OPUS8.1

Figure S18. ECD spectrum of tabercrassine B (2) in MeOH.

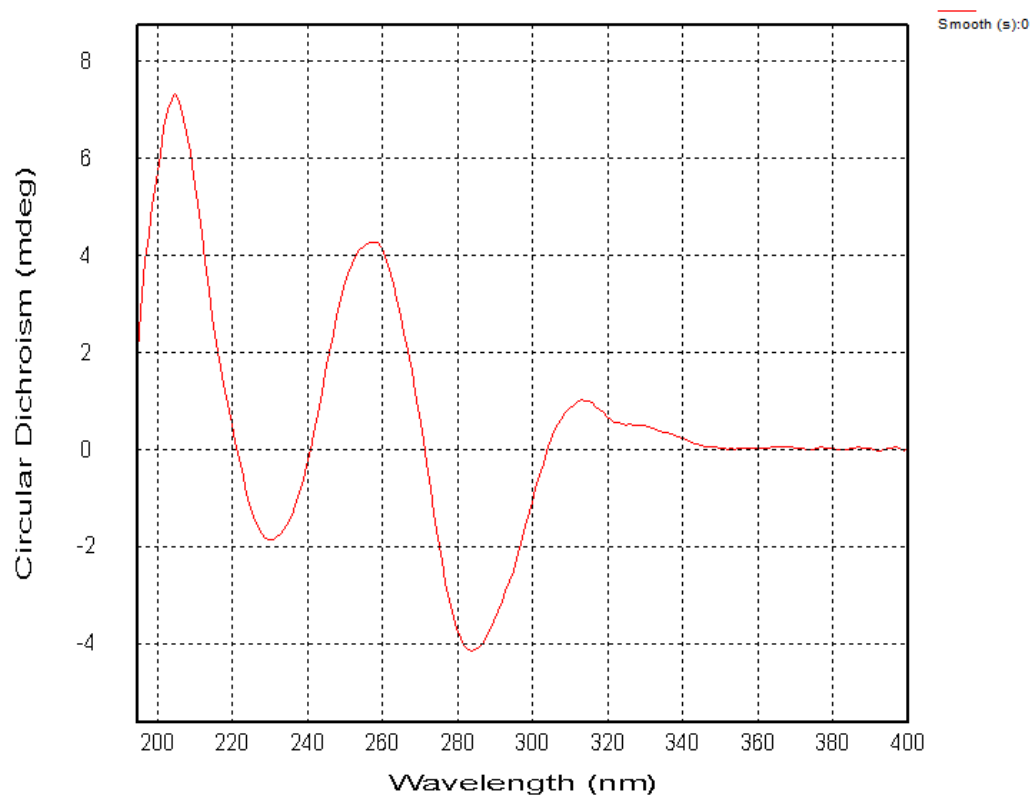

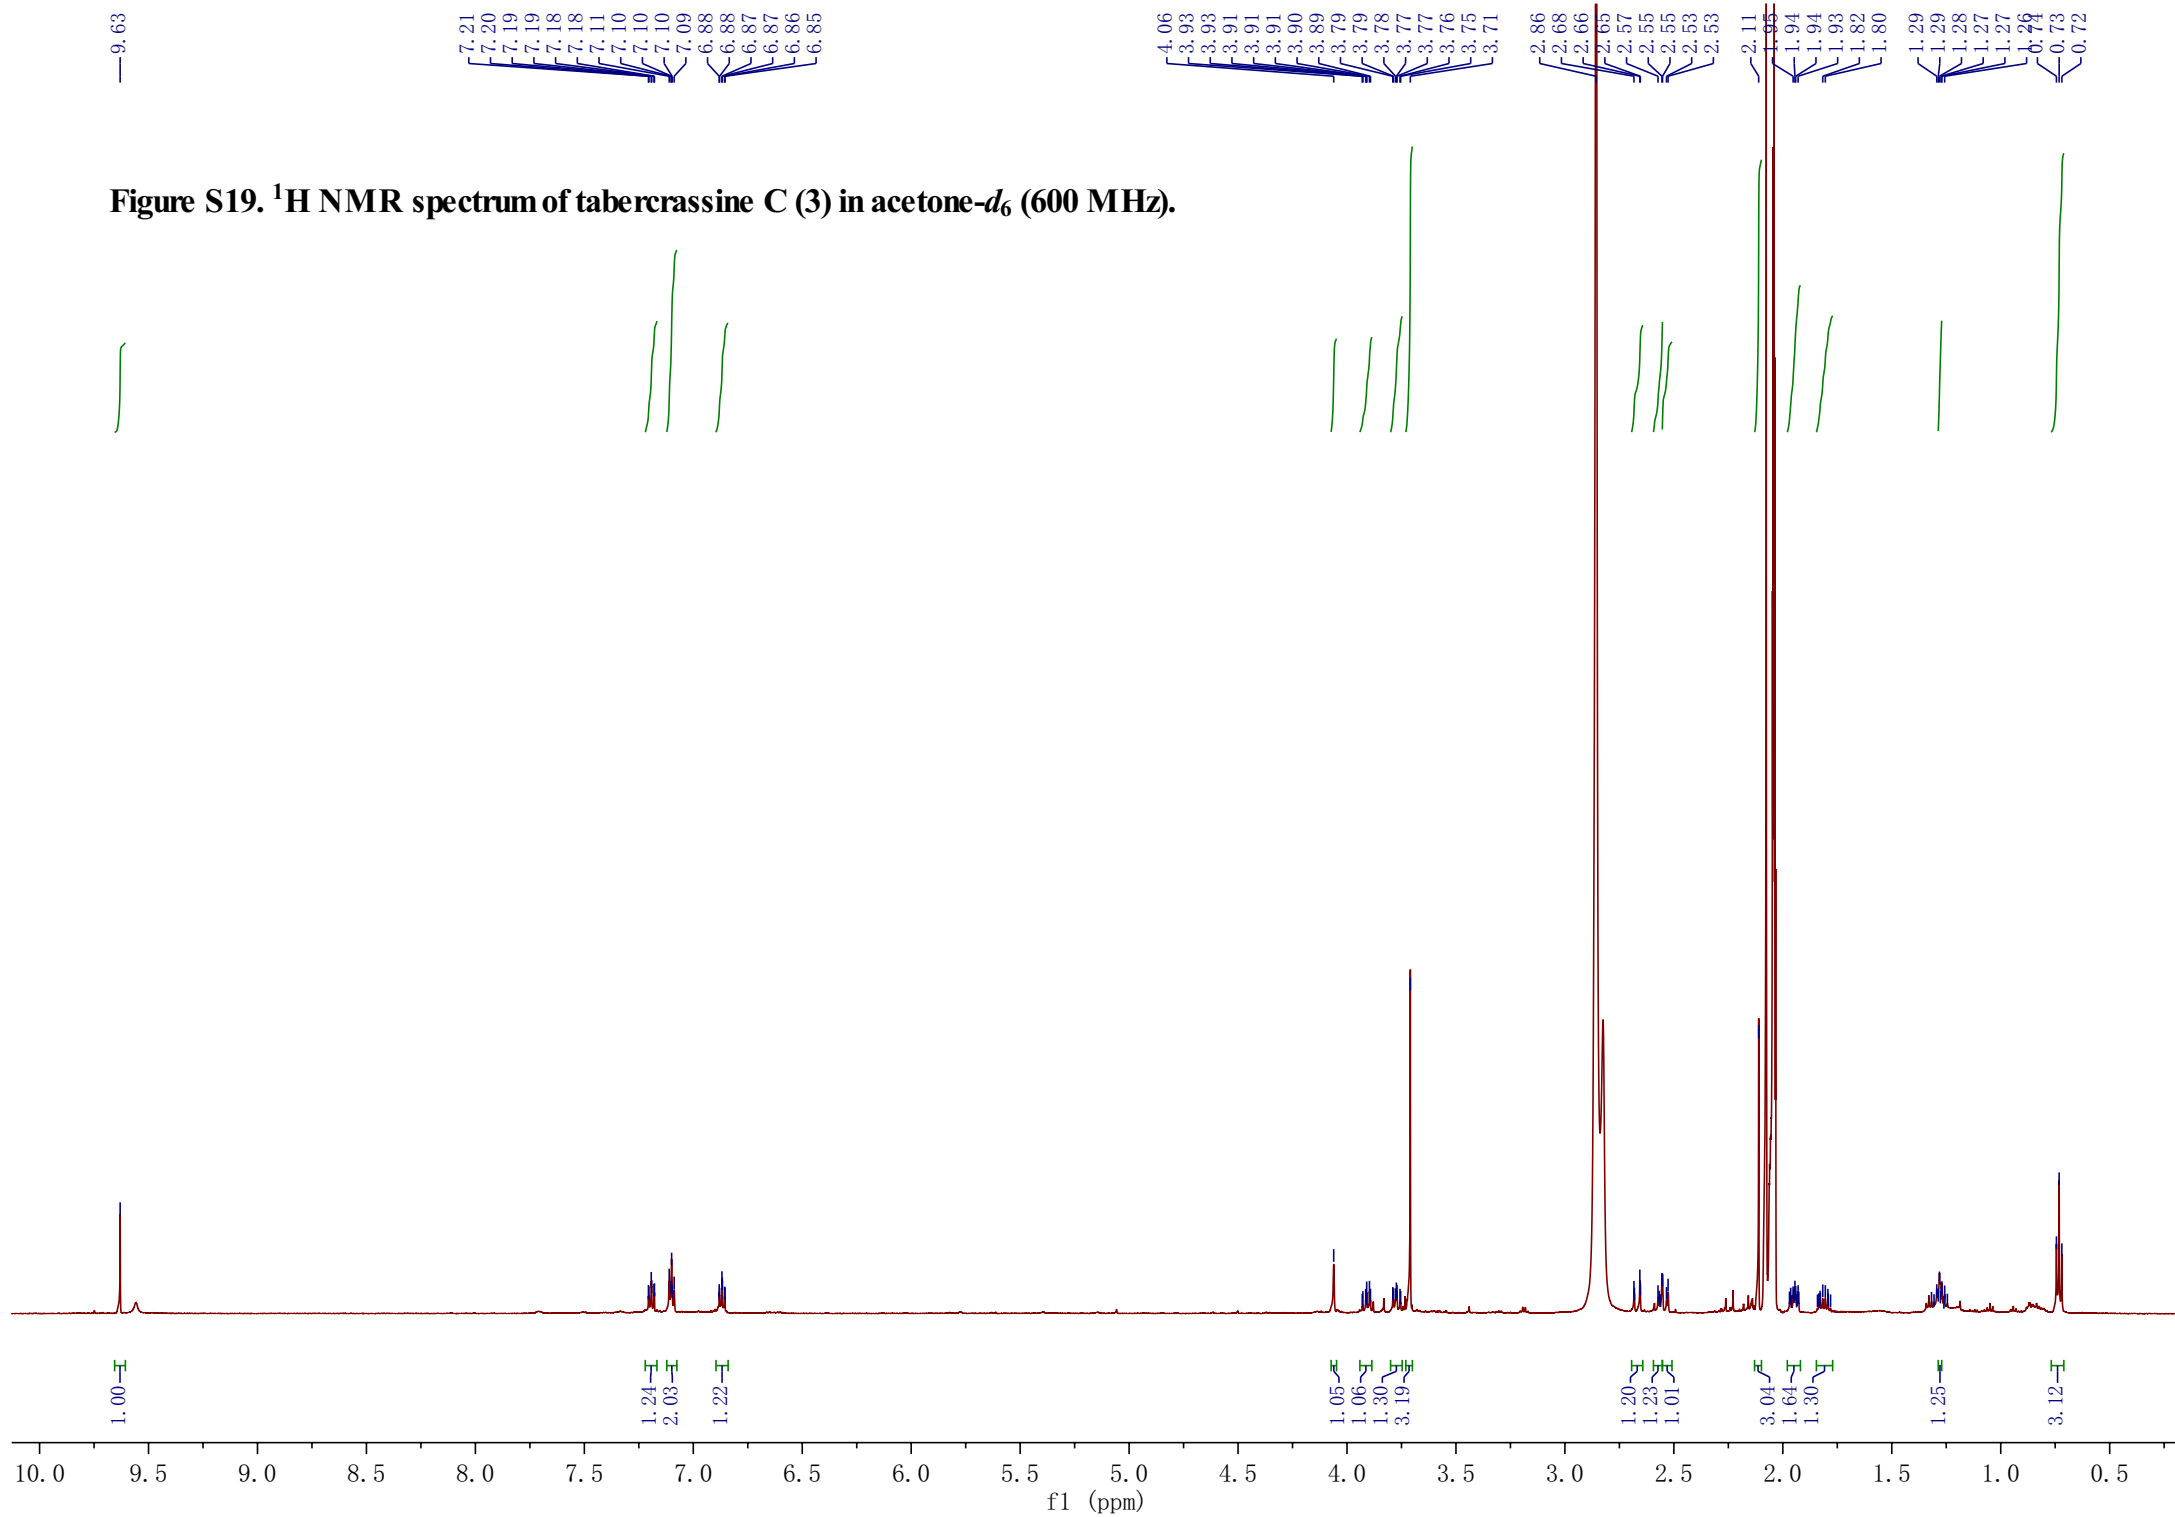

**Figure S20.**  $^{13}\text{C}$  NMR spectrum of taberocrassine **C** (**3**) in acetone- $d_6$  (150 MHz).

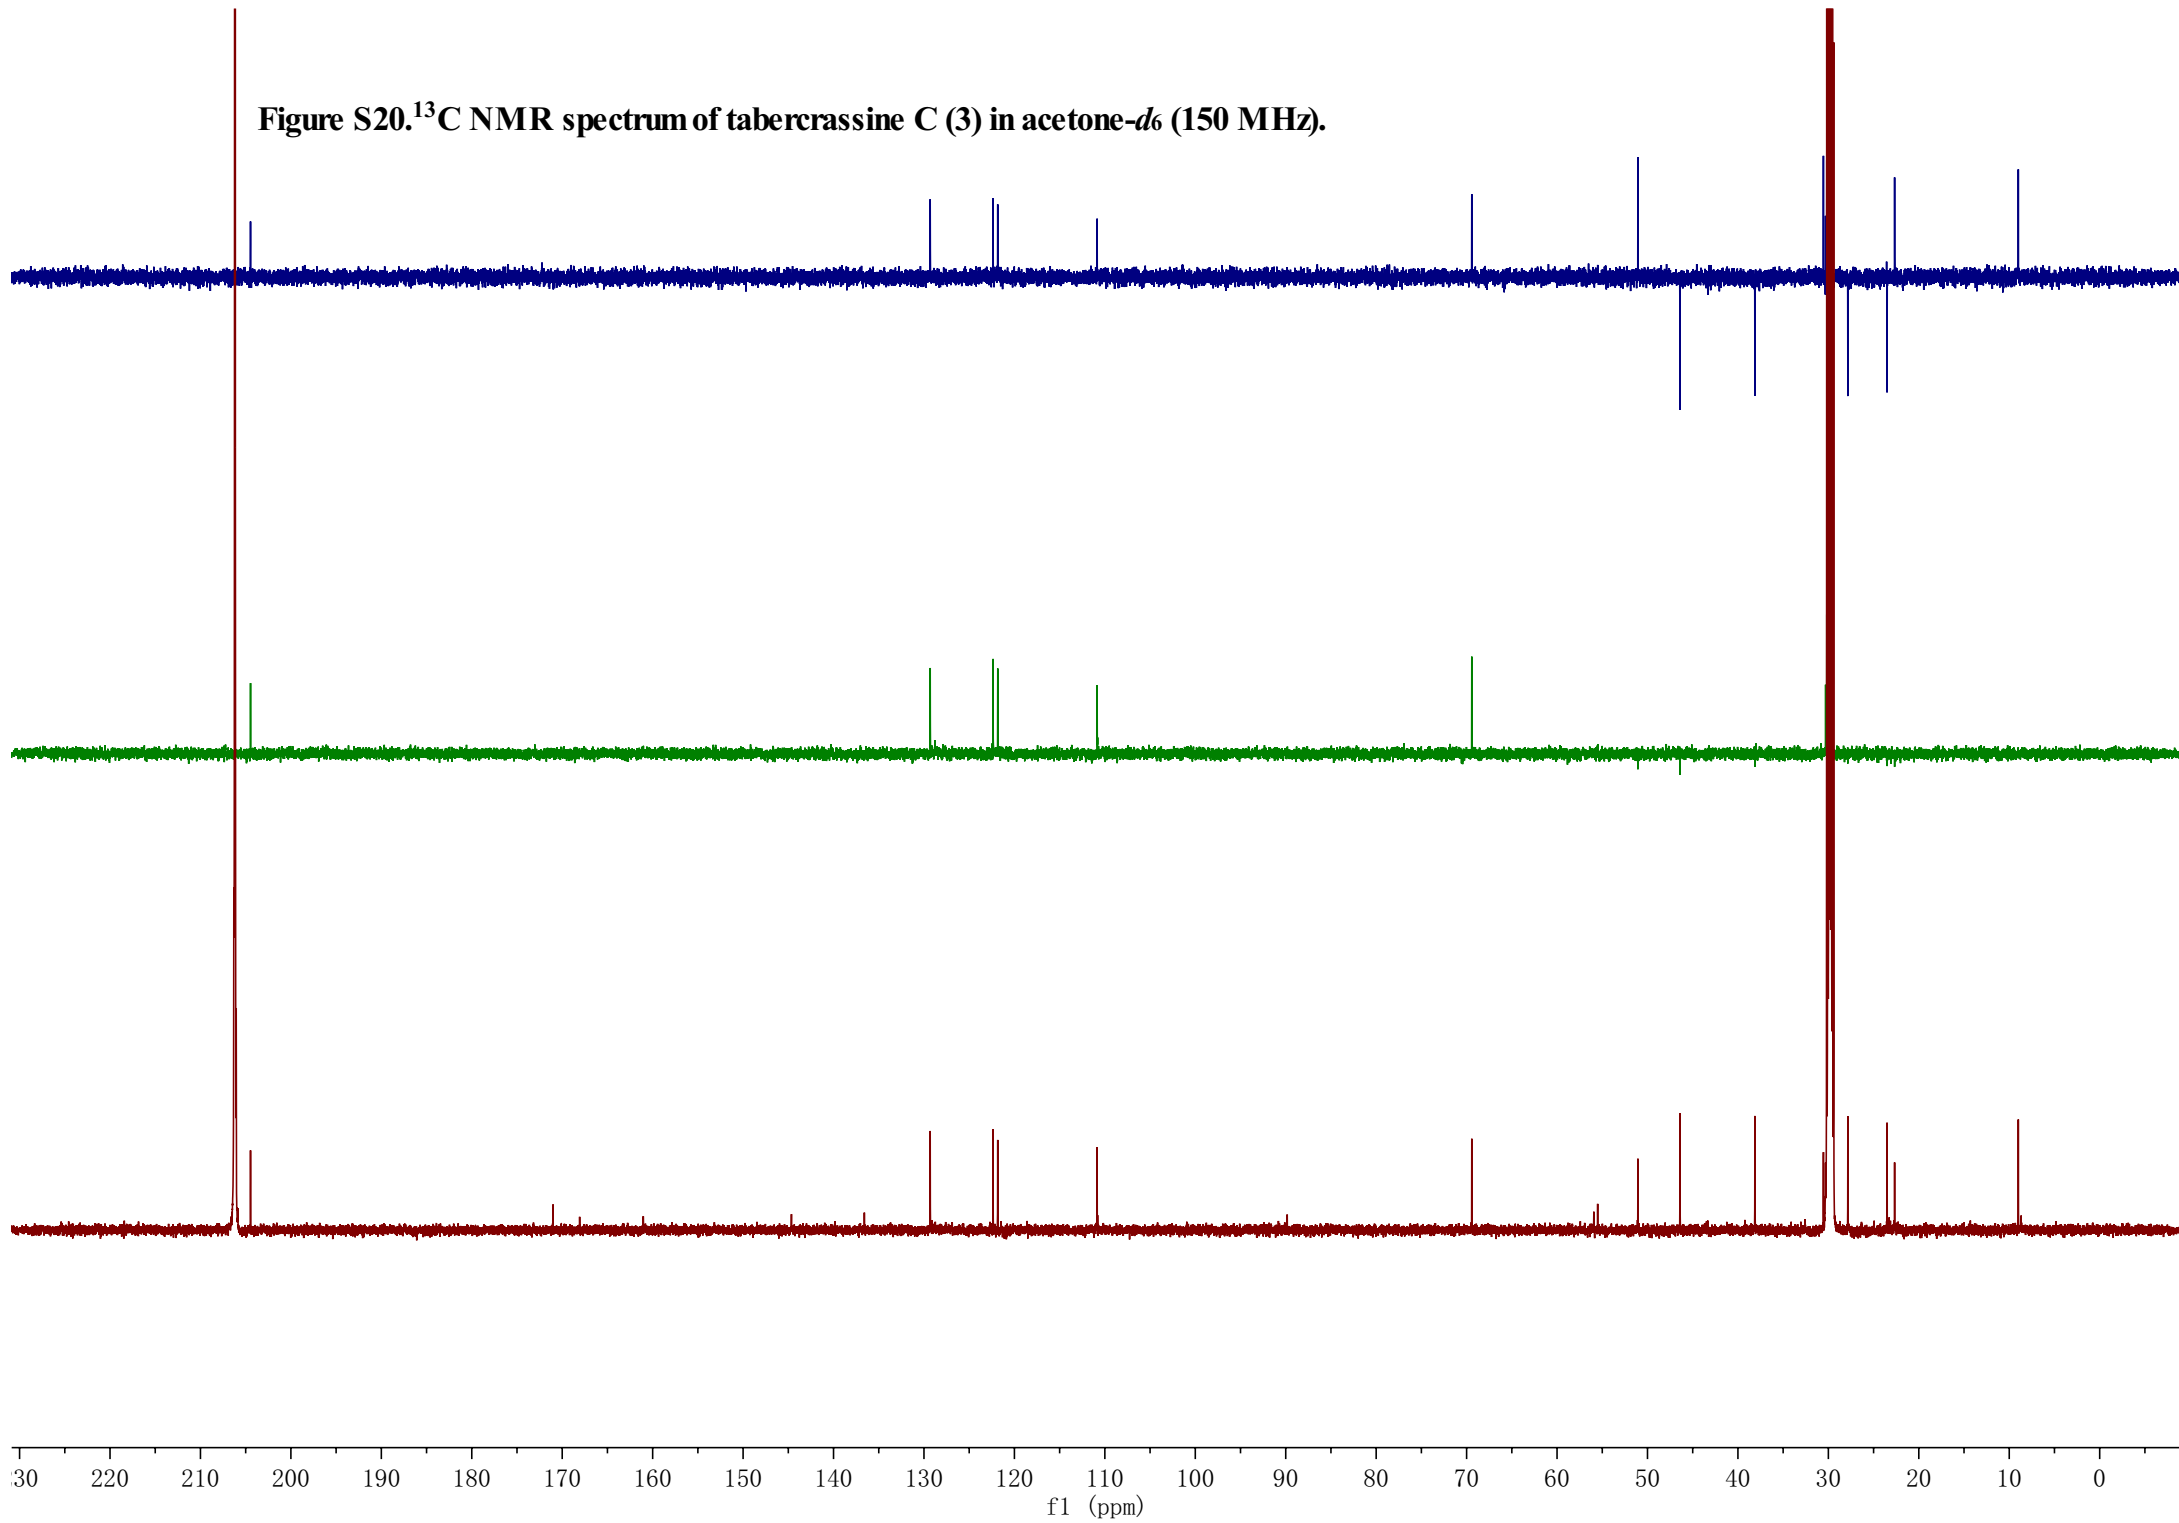



Figure S21. HSQC spectrum of tabercrassine C (3) in acetone- $d_6$ .

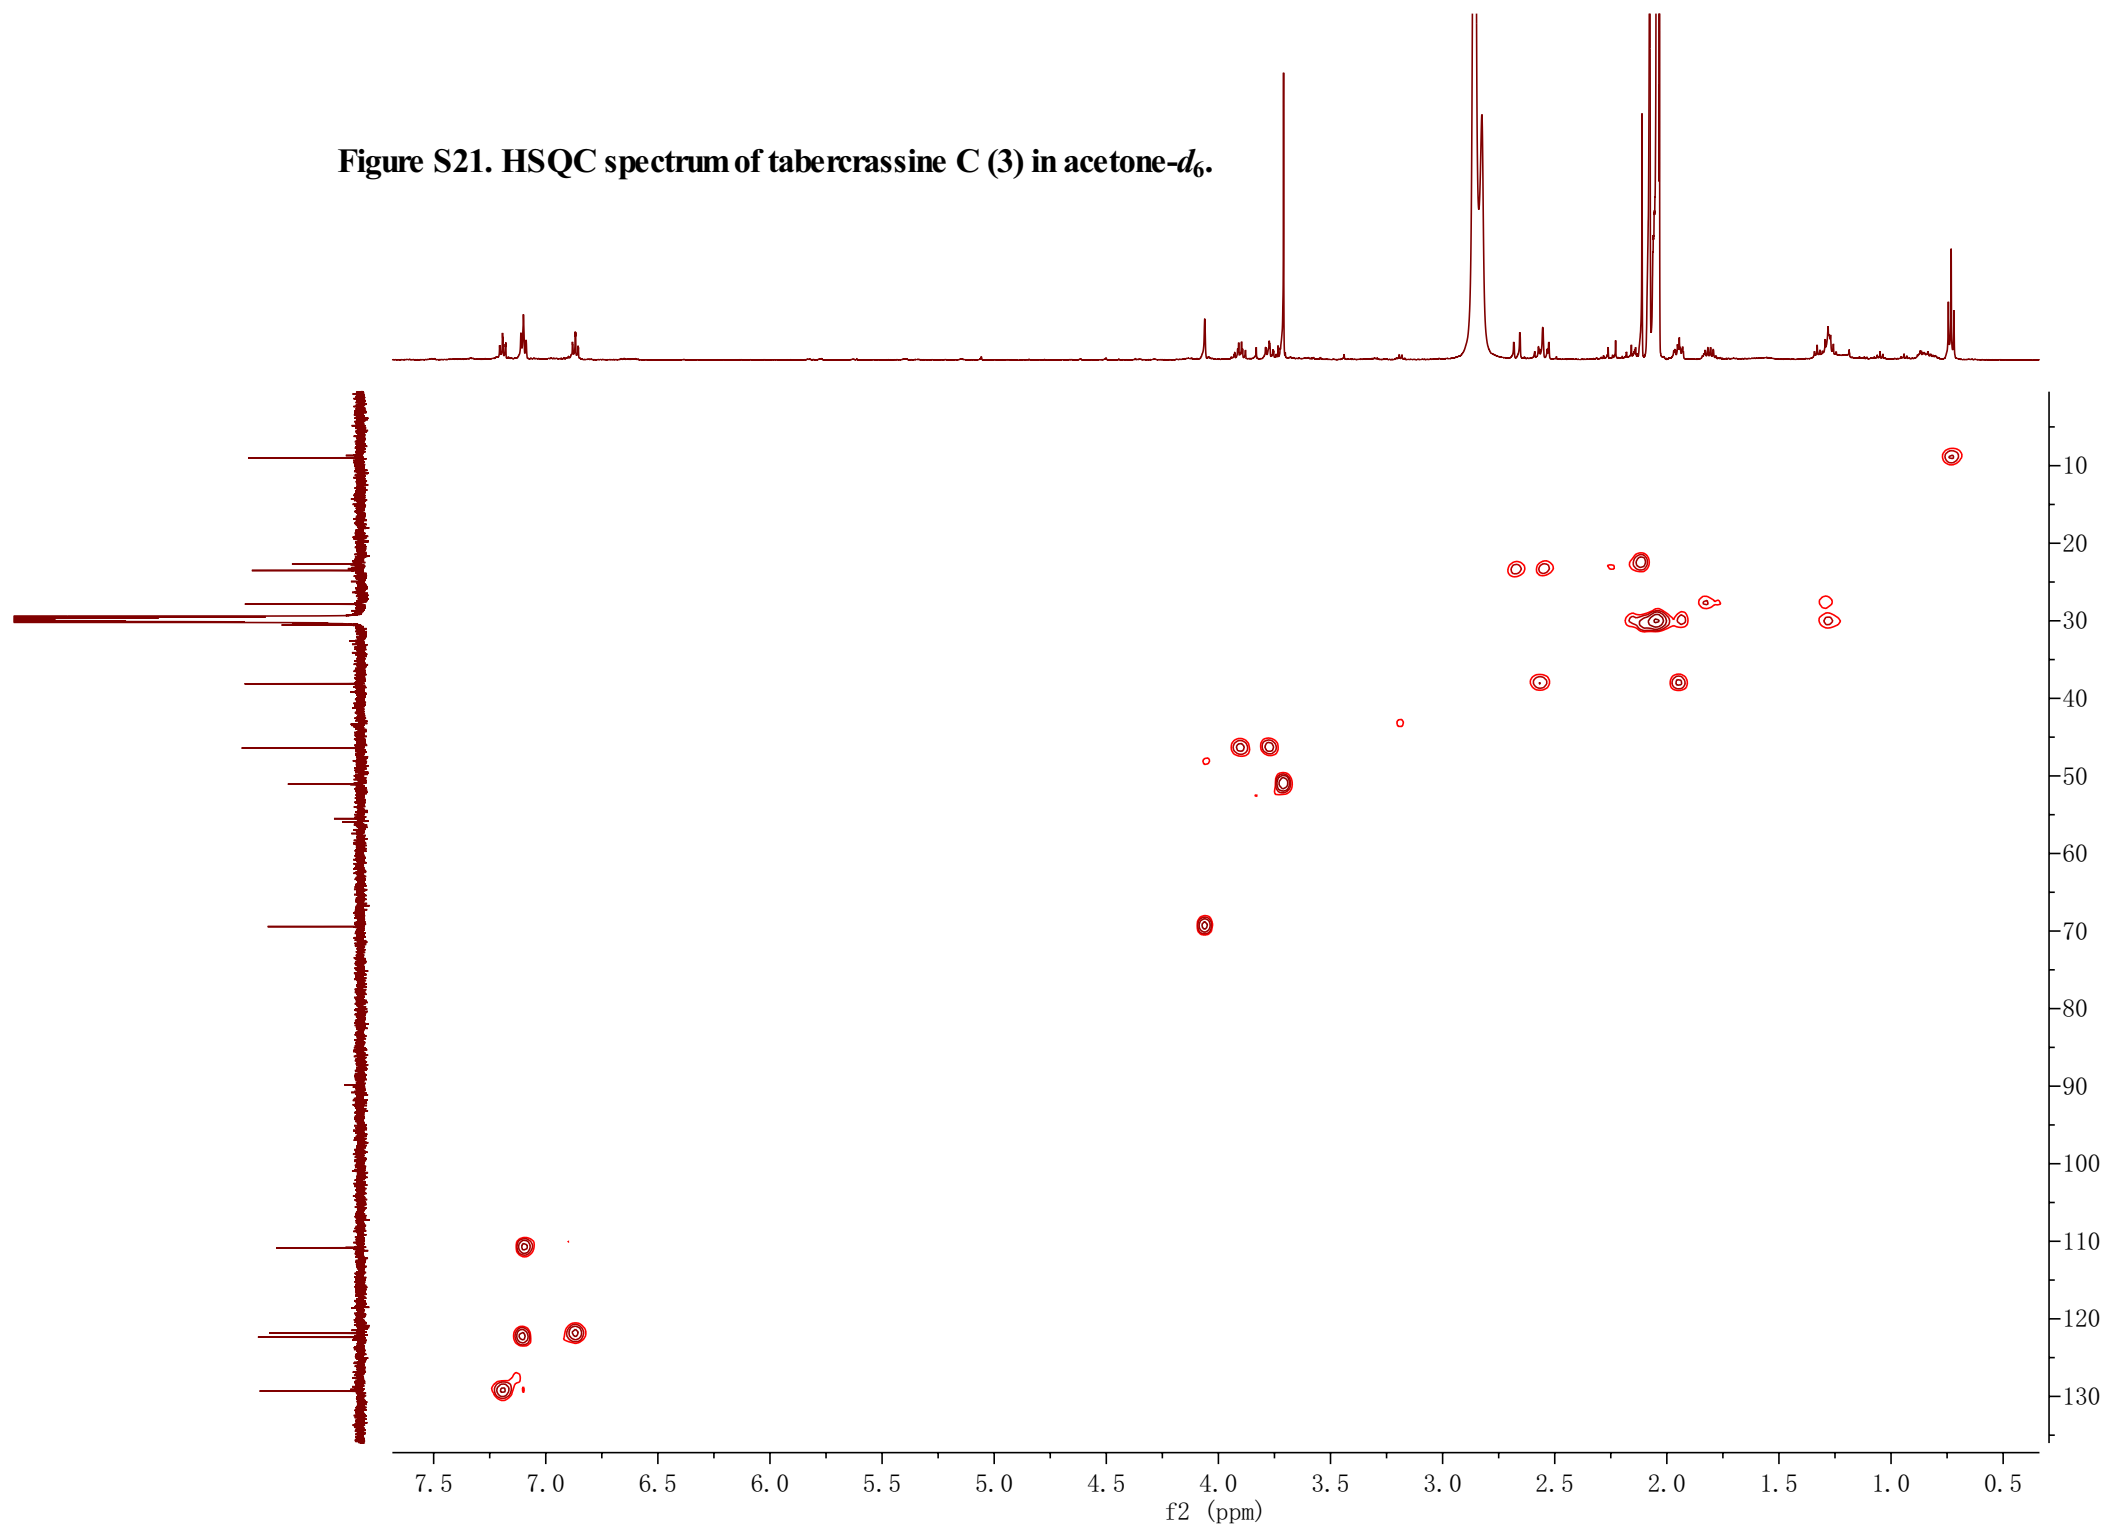

Figure S22.  $^1\text{H}$ - $^1\text{H}$  COSY spectrum of tabercrassine C (3) in acetone- $d_6$ .

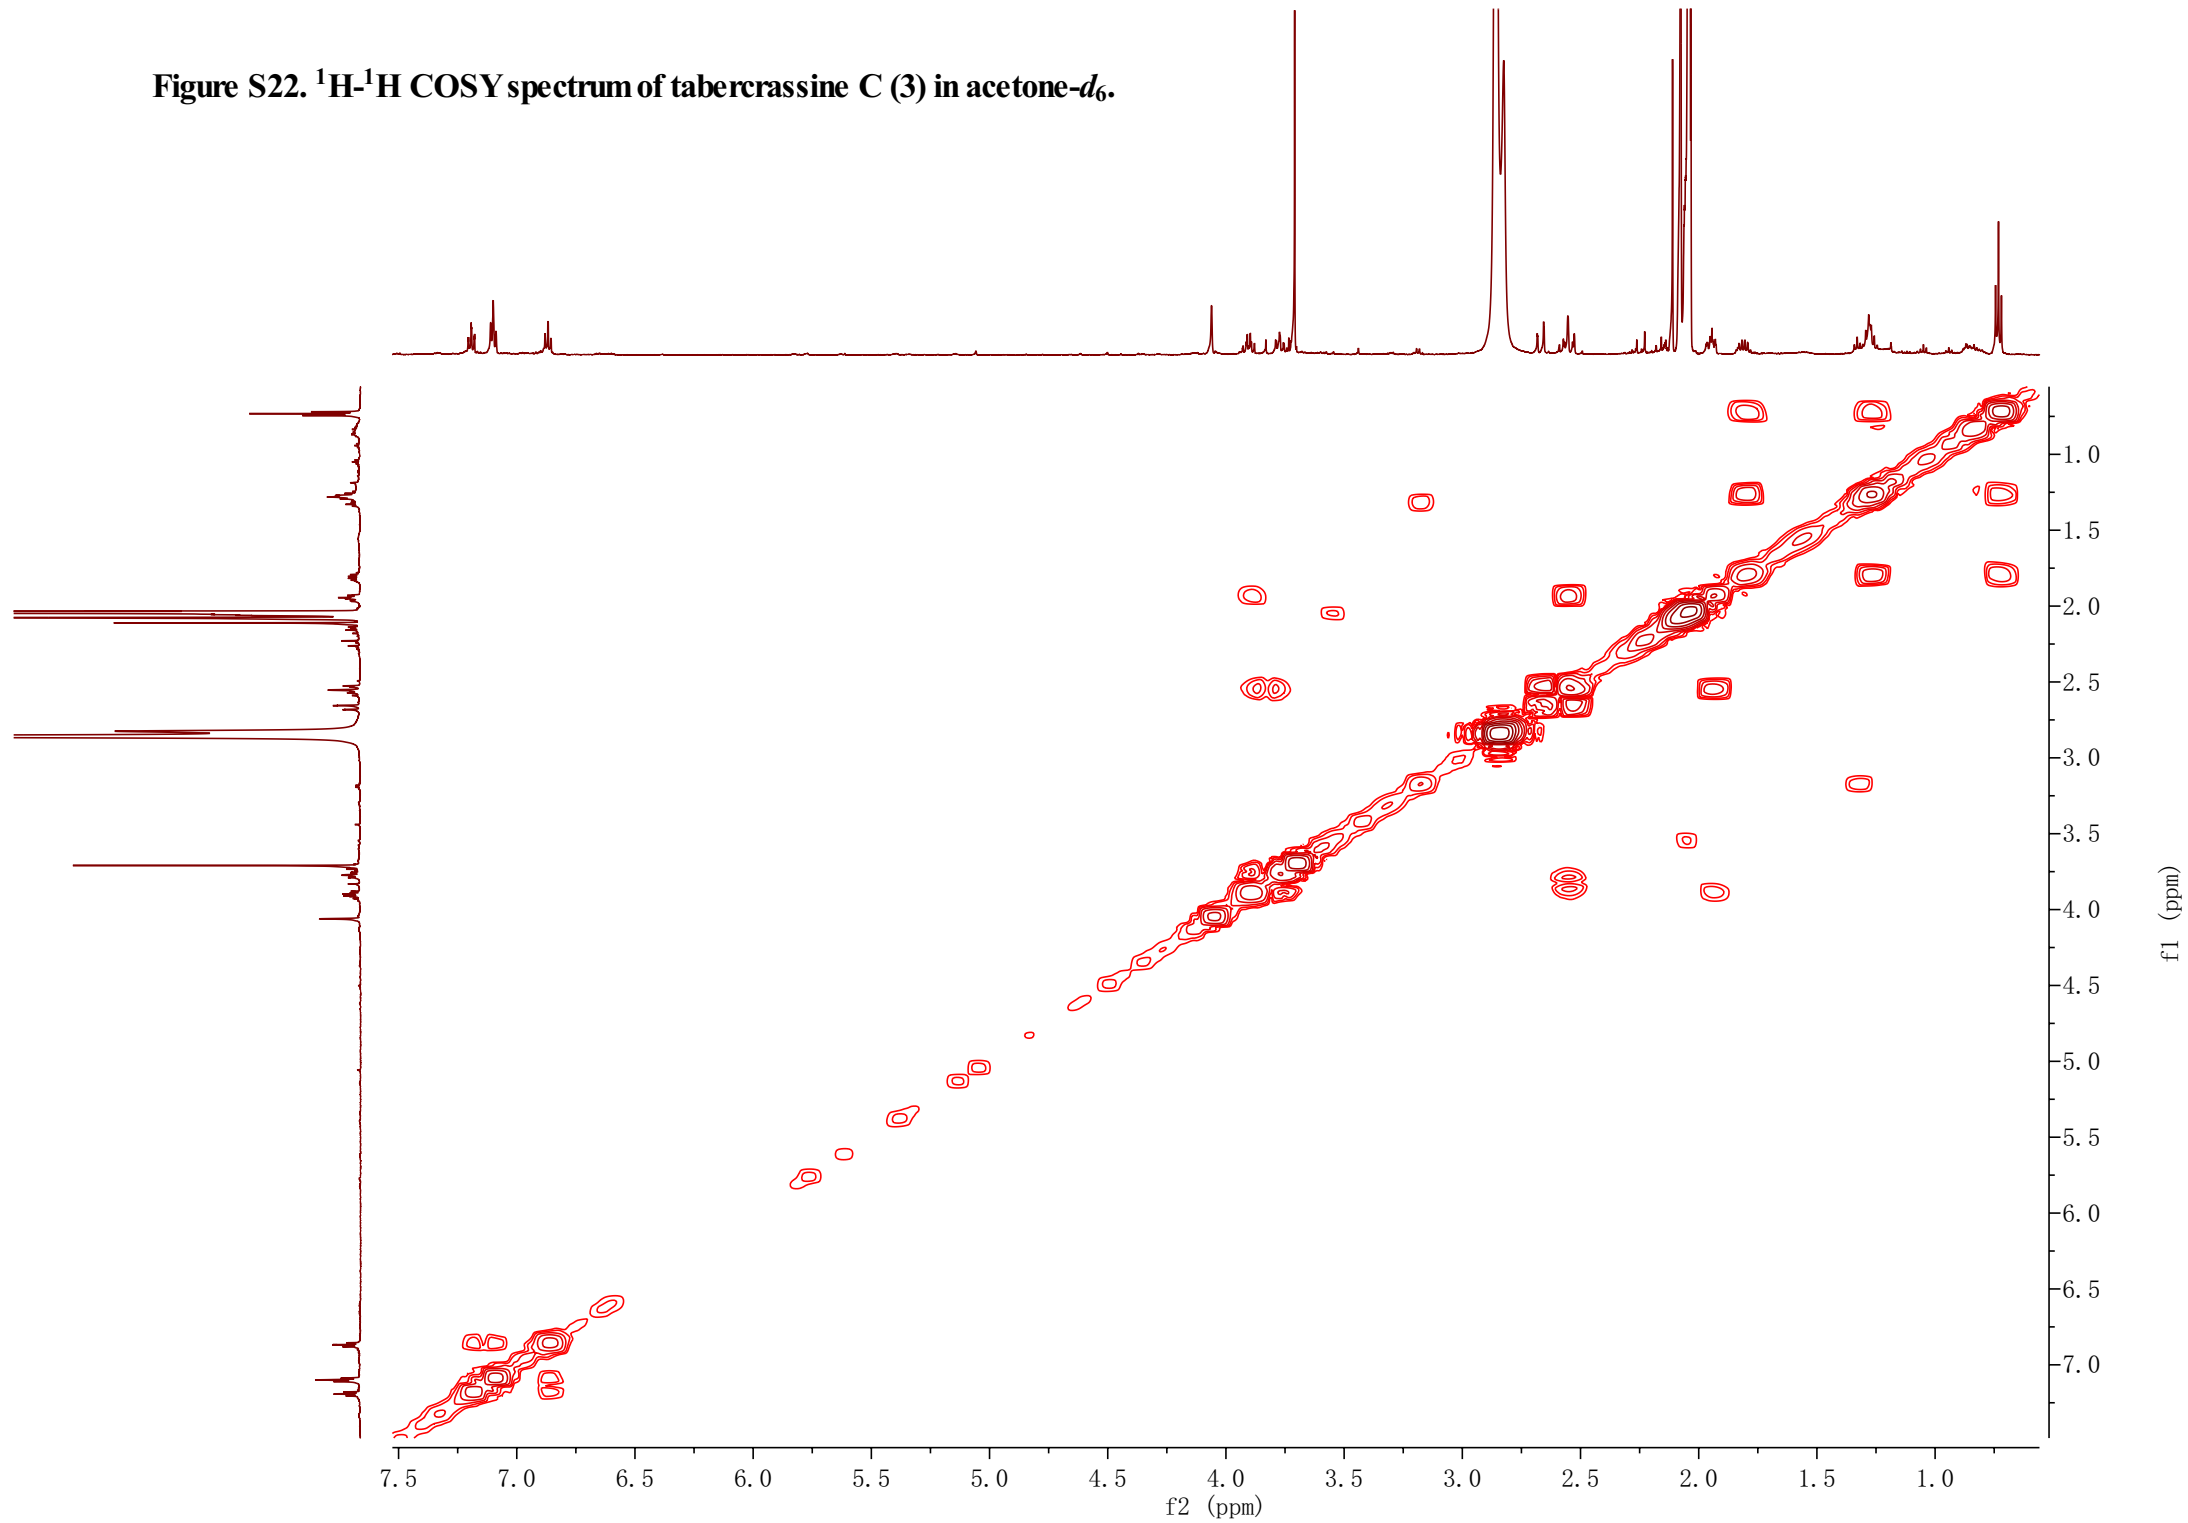

Figure S23. HMBC spectrum of tabercrassine C (3) in acetone- $d_6$ .

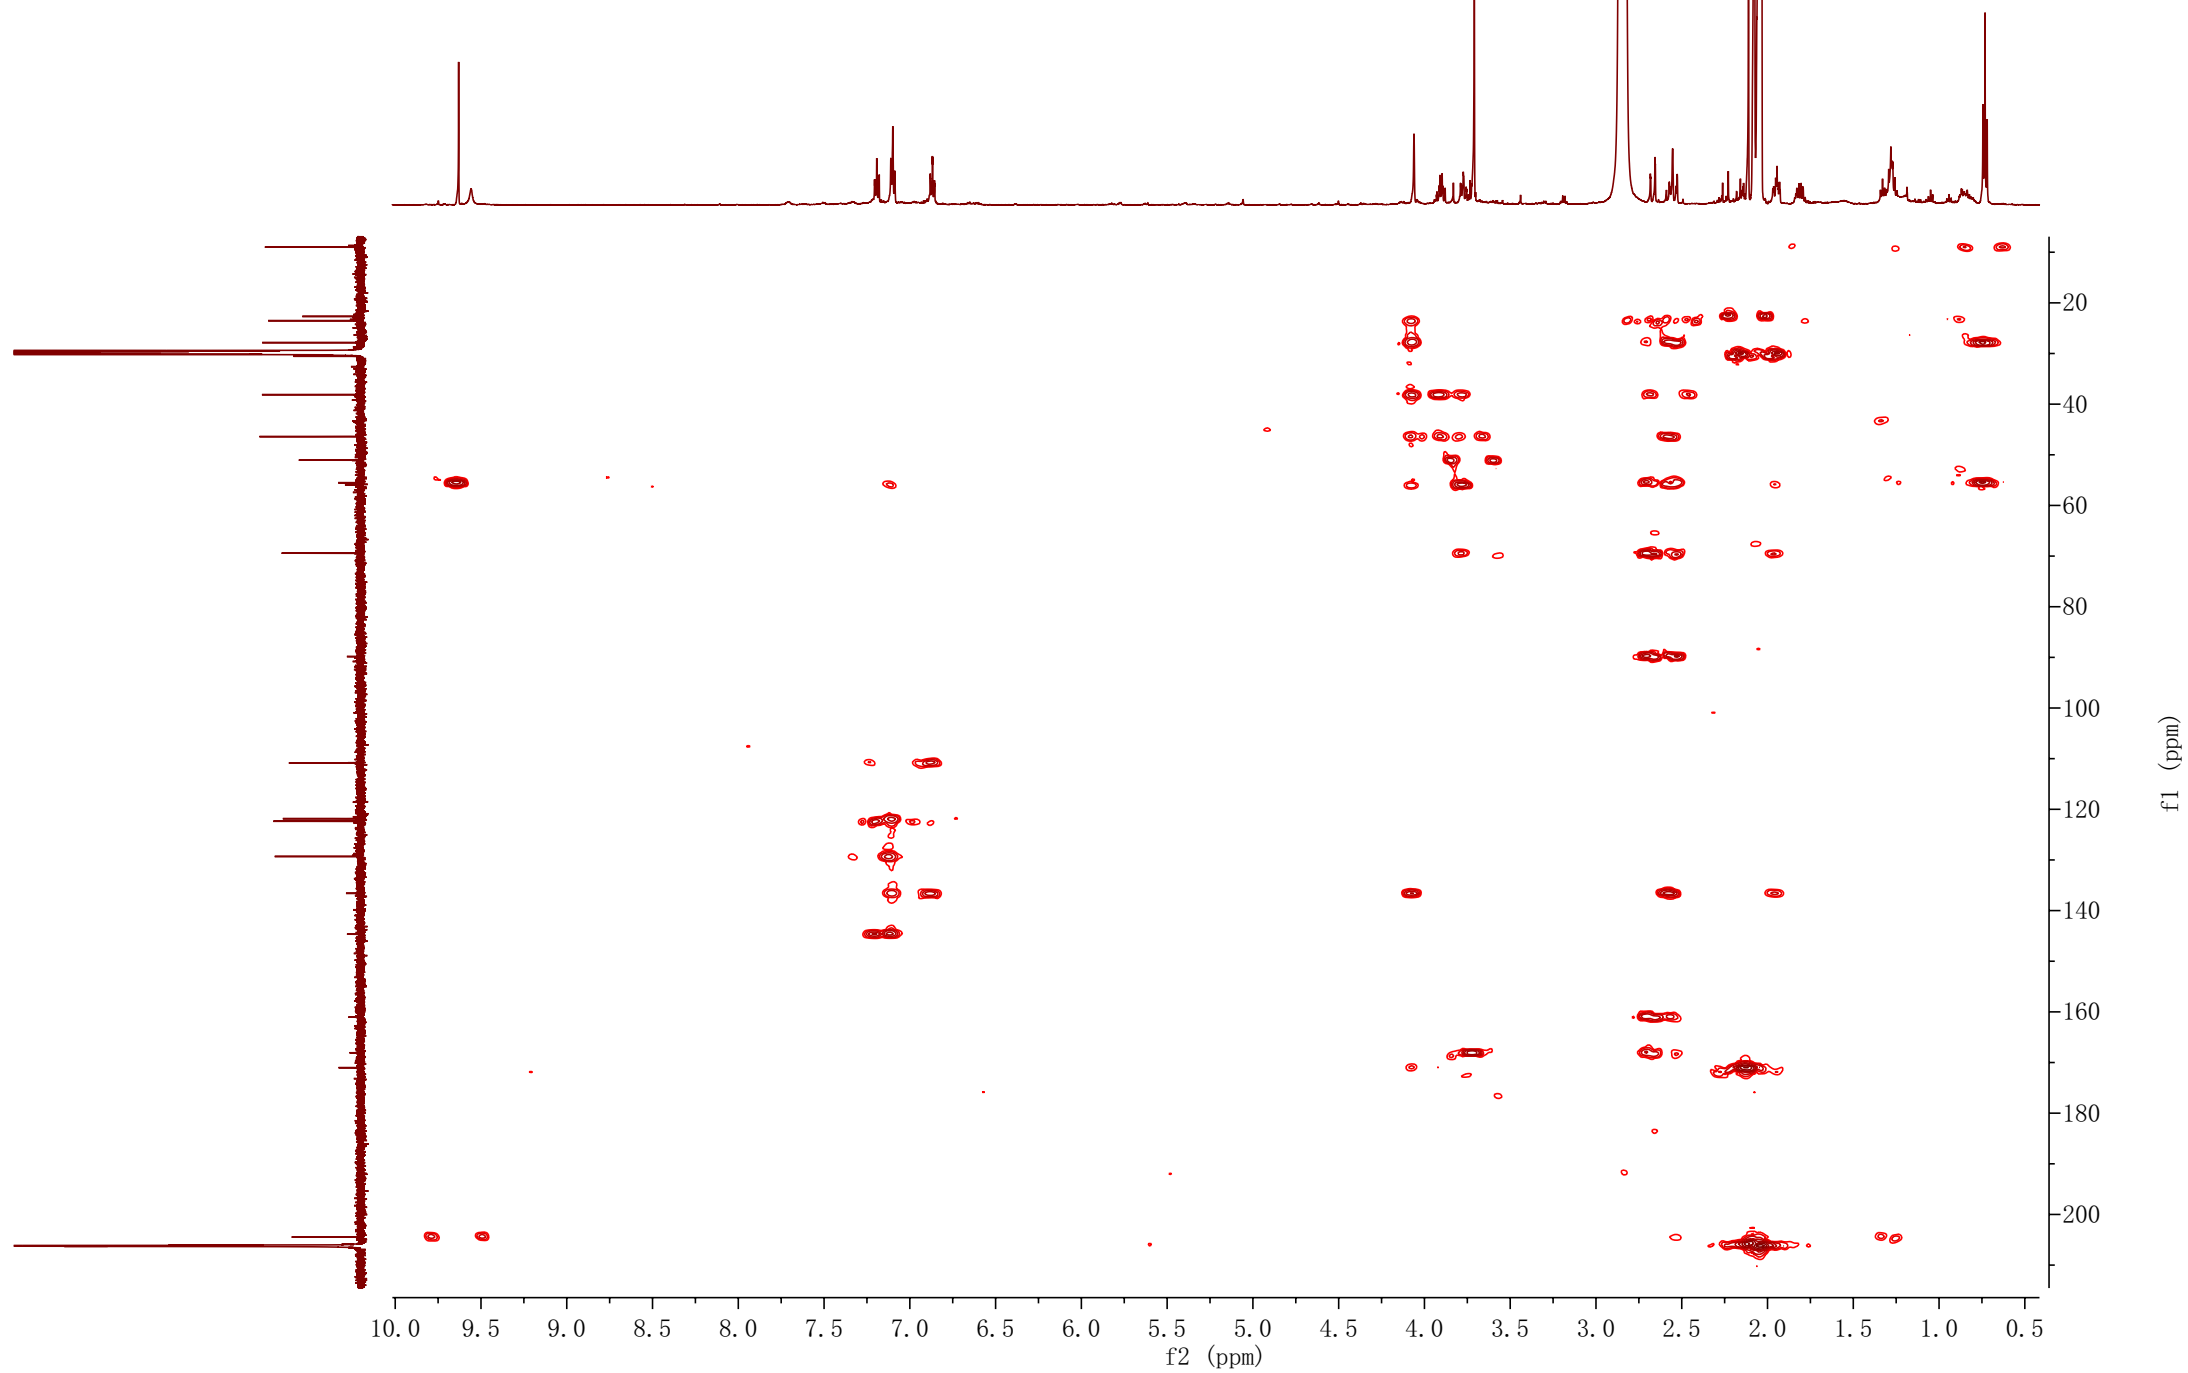

Figure S24. ROESY spectrum of tabercrassine C (3) in acetone- $d_6$ .

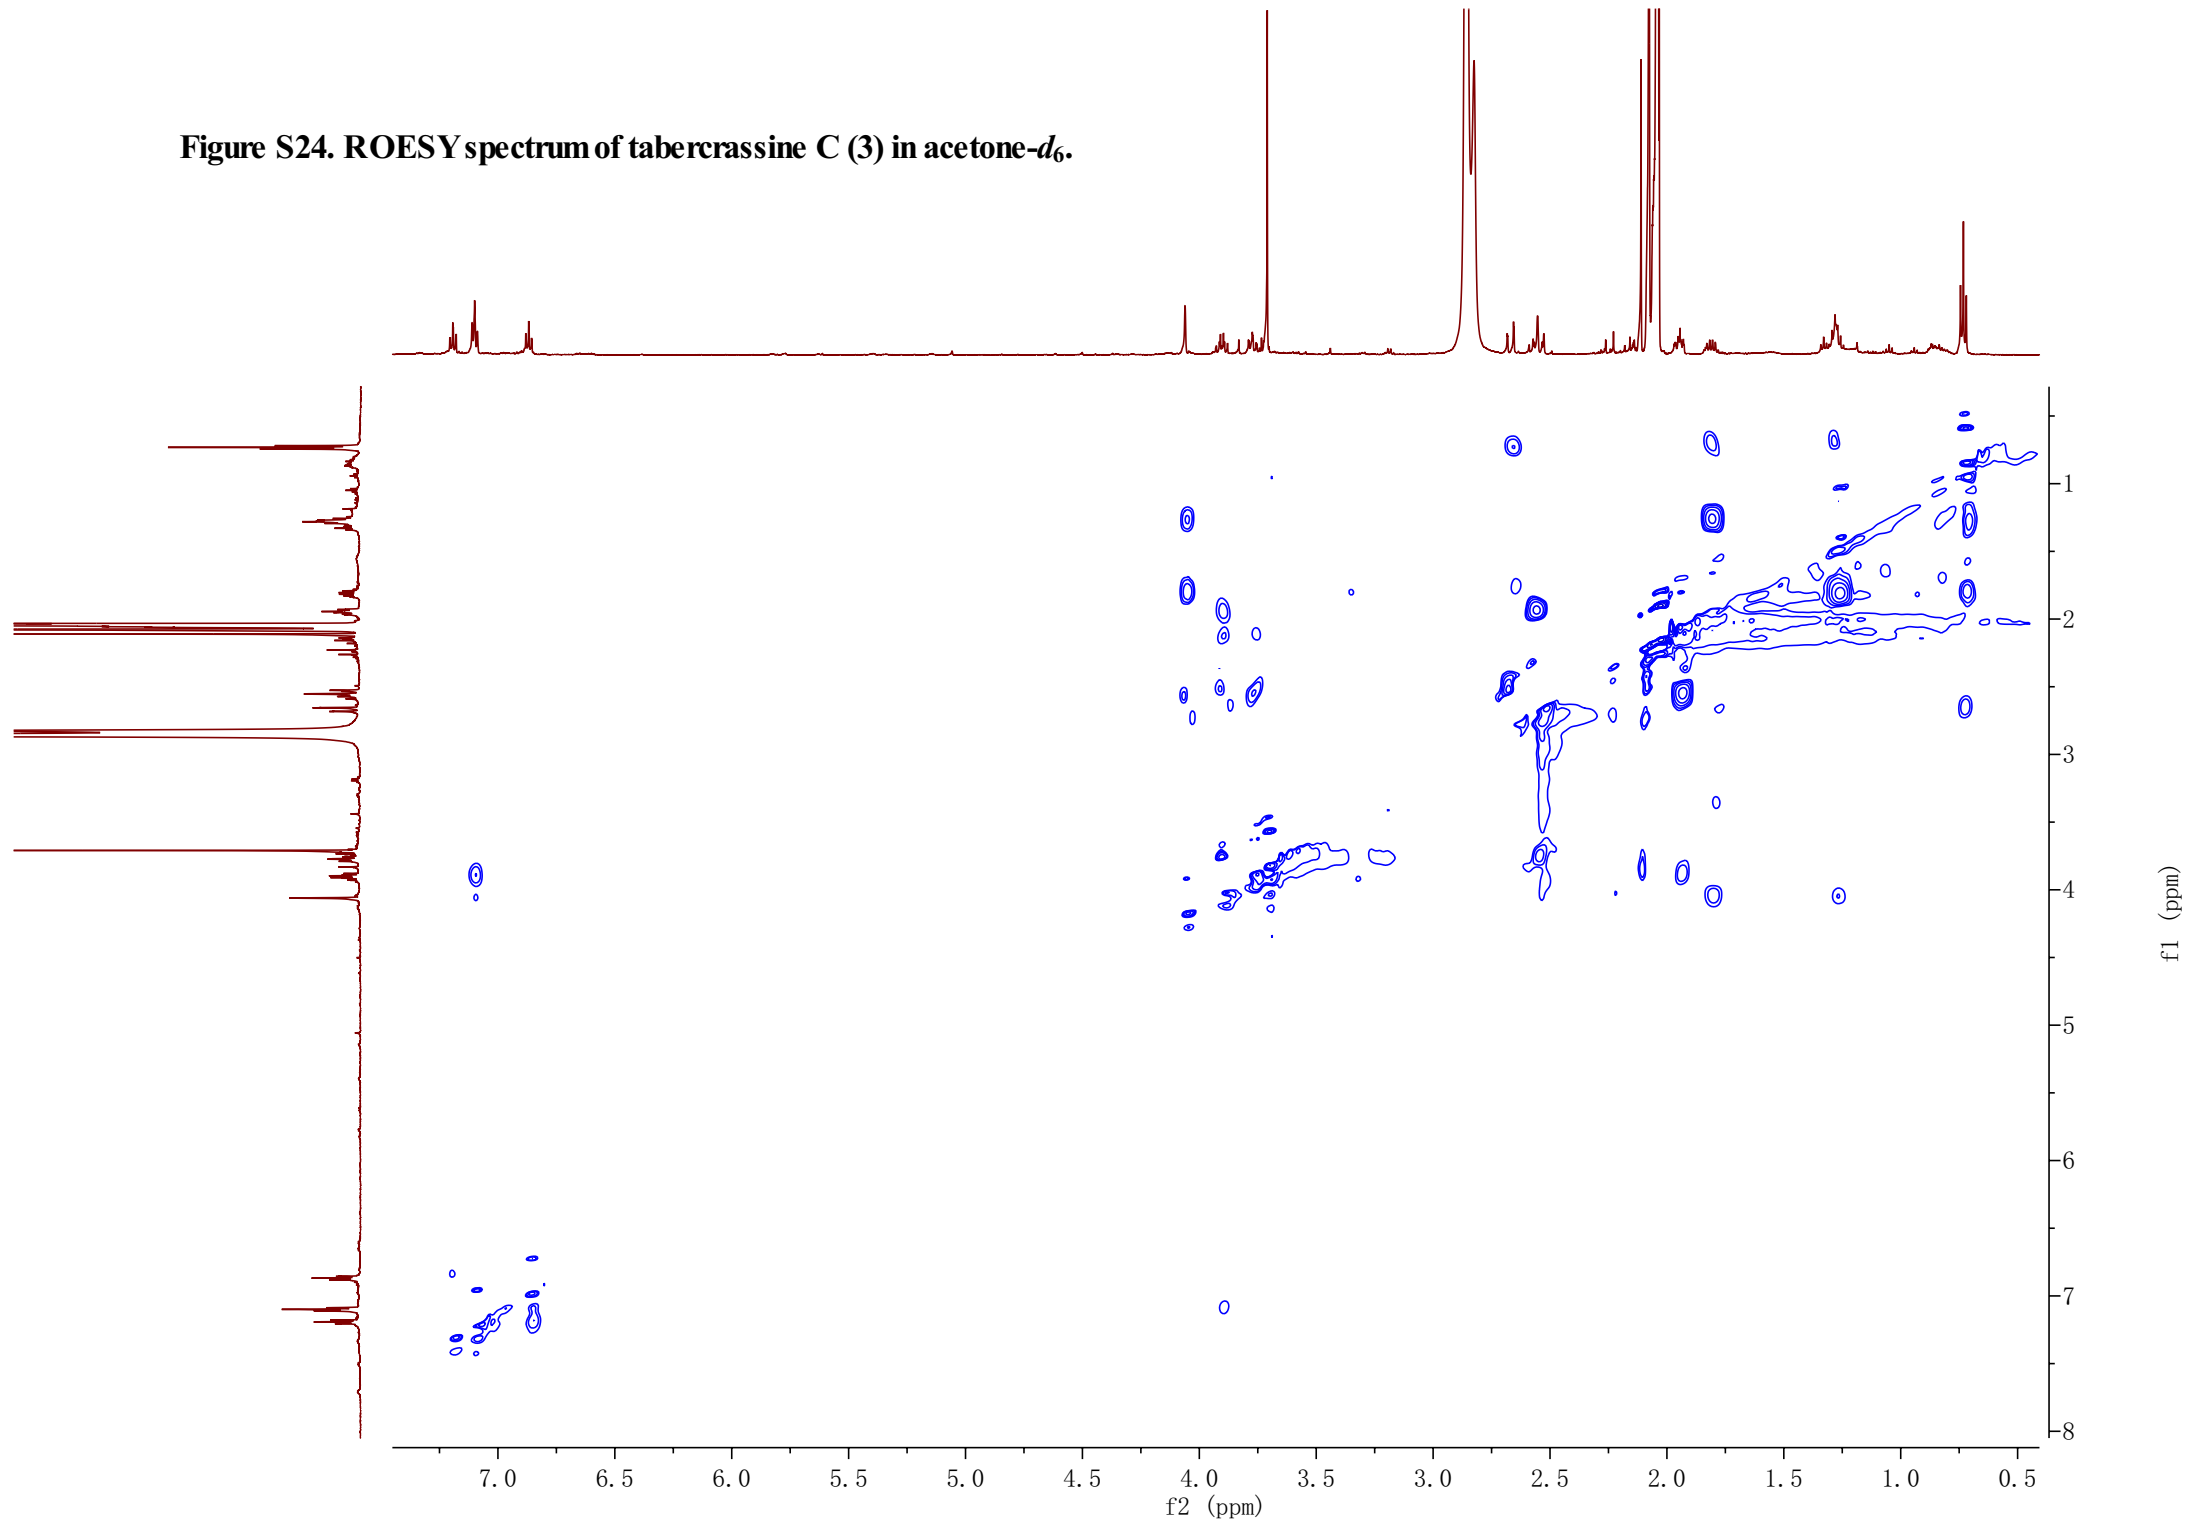

## Qualitative Analysis Report

|                               |              |                      |                      |
|-------------------------------|--------------|----------------------|----------------------|
| <b>Data Filename</b>          | hvf-41.d     | <b>Sample Name</b>   | hvf-41               |
| <b>Sample Type</b>            | Sample       | <b>Position</b>      | P1-A7                |
| <b>Instrument Name</b>        | Instrument 1 | <b>User Name</b>     |                      |
| <b>Acq Method</b>             | s.m          | <b>Acquired Time</b> | 8/13/2021 4:42:22 PM |
| <b>IRM Calibration Status</b> | Success      | <b>DA Method</b>     | PCDL.m               |
| <b>Comment</b>                |              |                      |                      |

|                       |                             |
|-----------------------|-----------------------------|
| <b>Sample Group</b>   | <b>Info.</b>                |
| <b>Acquisition SW</b> | 6200 series TOF/6500 series |
| <b>Version</b>        | Q-TOF B.05.01 (B5125.2)     |

### User Spectra

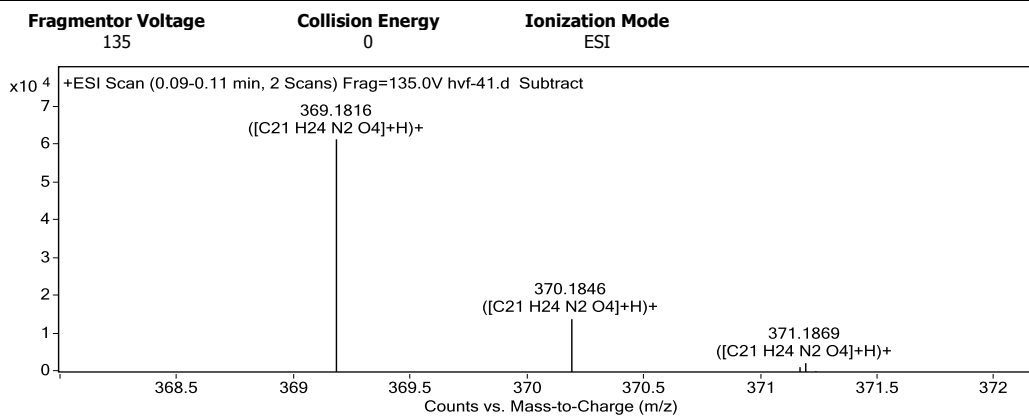

### Peak List

| m/z      | z | Abund    | Formula                                                       | Ion                |
|----------|---|----------|---------------------------------------------------------------|--------------------|
| 274.2747 | 1 | 9569.97  |                                                               |                    |
| 318.3011 | 1 | 6406.61  |                                                               |                    |
| 369.1816 | 1 | 61505.75 | C <sub>21</sub> H <sub>24</sub> N <sub>2</sub> O <sub>4</sub> | (M+H) <sup>+</sup> |
| 370.1846 | 1 | 14211.29 | C <sub>21</sub> H <sub>24</sub> N <sub>2</sub> O <sub>4</sub> | (M+H) <sup>+</sup> |
| 385.1766 | 1 | 10916.56 |                                                               |                    |
| 399.1555 | 1 | 8922.11  |                                                               |                    |
| 401.1714 | 1 | 17037.61 |                                                               |                    |
| 405.1668 | 1 | 6267.22  |                                                               |                    |
| 417.1665 | 1 | 13309.22 |                                                               |                    |
| 855.3073 | 1 | 7793.51  |                                                               |                    |

### Formula Calculator Element Limits

| Element | Min | Max |
|---------|-----|-----|
| C       | 3   | 60  |
| H       | 0   | 120 |
| O       | 0   | 30  |
| N       | 0   | 3   |

### Formula Calculator Results

| Formula                                                       | CalculatedMass | CalculatedMz | Mz       | Diff. (mDa) | Diff. (ppm) | DBE     |
|---------------------------------------------------------------|----------------|--------------|----------|-------------|-------------|---------|
| C <sub>21</sub> H <sub>24</sub> N <sub>2</sub> O <sub>4</sub> | 368.1736       | 369.1809     | 369.1816 | -0.70       | -1.90       | 11.0000 |

--- End Of Report ---

Figure S26. IR spectrum of taberocrassine C (3).

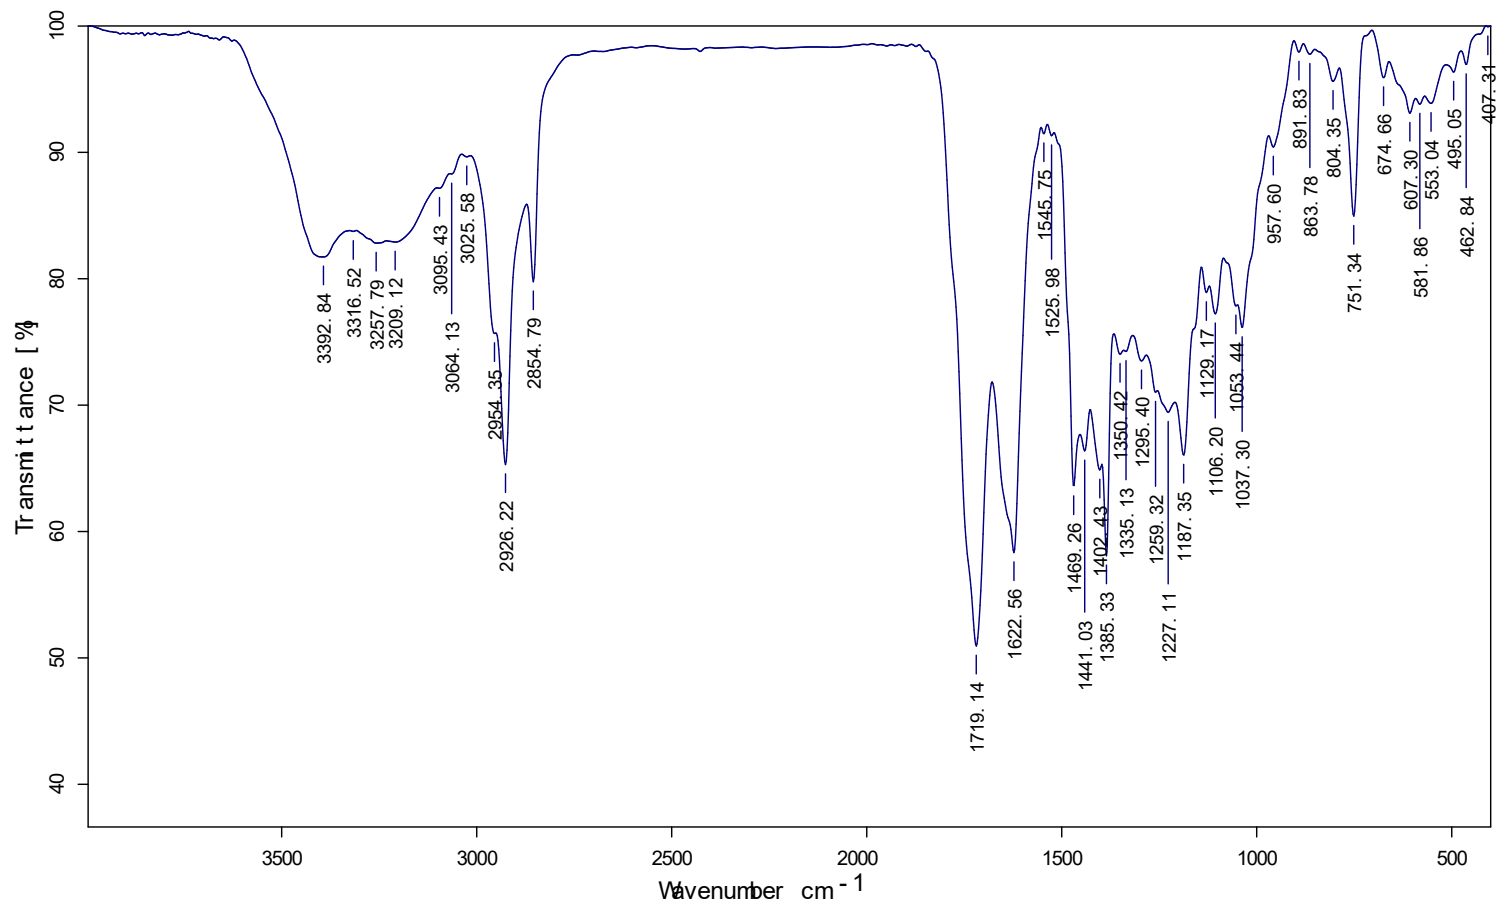

Sample Name: hvf41

Sample Form: KBr

Path of File: E:\data

Date of Measurement: 2022/3/25

Resolution: 4

Aperture Setting: 6 mm

Number of Background Scans: 16

Number of Sample Scans: 16

Beamsplitter Setting: KBr

Source Setting: MIR

Instrument Type: BRUKER VERTEX 70

Soft Version: OPUS8.1

**Figure S27. ECD spectrum of tabercrassine C (3) in MeOH.**

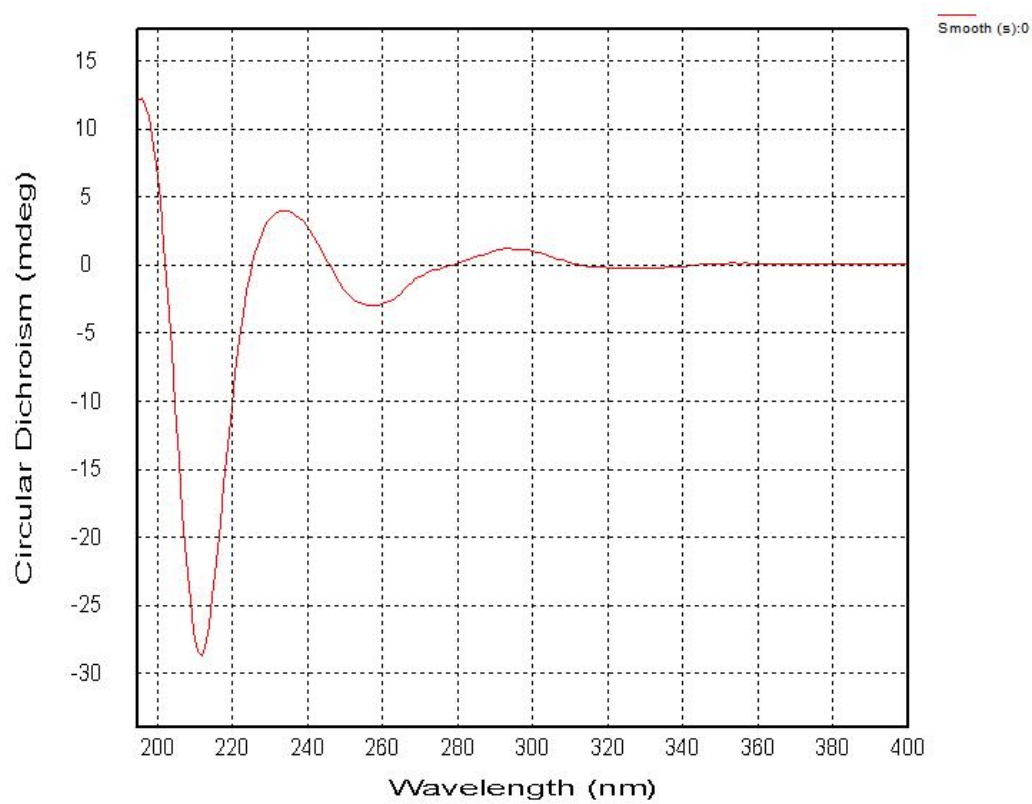

Figure S28. Calculated and experimental ECD of **2** and **3**.

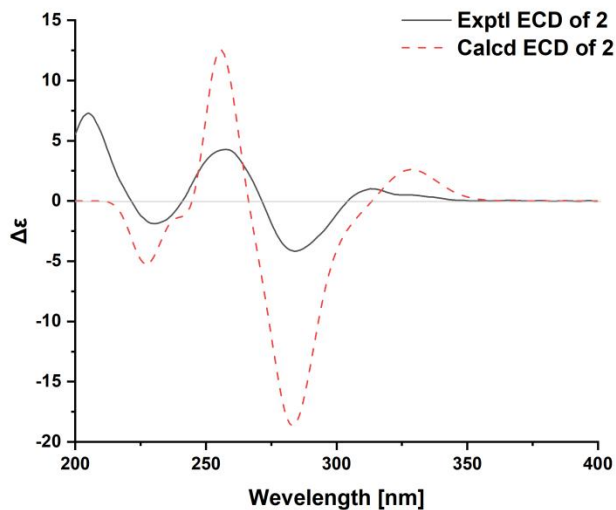

Comparison of the experimental and calculated ECD spectra of **2**.

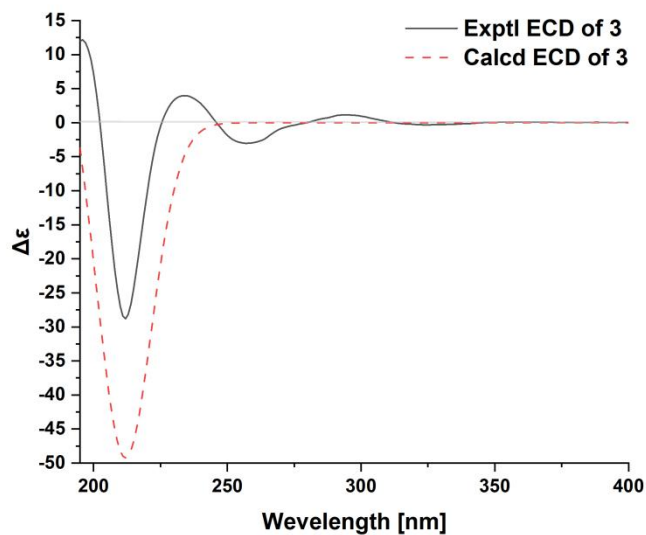

Comparison of the experimental and calculated ECD spectra of **3**.

ECD calculation methods for **2** and **3**:

The CONFLEX<sup>[1, 2]</sup> searches based on molecular mechanics with MMFF94S force fields were performed for **2** and **3** which gave 41 and 11 stable conformers, respectively.

Selected conformers (9 and 5) with distributions higher than 1% were further optimized



by the density functional theory method at the B3LYP/6-31G\* level in Gaussian 09 program package,<sup>[3]</sup> leading to 2 and 4 geometries ( $\Delta E > 2$  kcal/mol), respectively, which was further checked by frequency calculation and resulted in no imaginary frequencies. The ECD was calculated using TD-DFT-B3LYP/6-31G (d, p) of theory for compounds **2** and **3** on B3LYP/6-31G(d) optimized geometry through the IEFPCM model (in MeOH). The calculated ECD curves were generated using SpecDis 1.60<sup>[4]</sup>.

Standard orientation of **2a** at B3LYP/6-31G(d) level in gas phase:

| Center | Atomic | Atomic | Coordinates (Angstroms) |           |           |
|--------|--------|--------|-------------------------|-----------|-----------|
| Number | Number | Type   | X                       | Y         | Z         |
| 1      | 6      | 0      | -4.853816               | -2.963797 | 0.064630  |
| 2      | 6      | 0      | -5.062657               | -2.678487 | -1.306252 |
| 3      | 6      | 0      | -4.352946               | -1.675547 | -1.945589 |
| 4      | 6      | 0      | -3.422471               | -0.949741 | -1.192950 |
| 5      | 6      | 0      | -3.201274               | -1.216578 | 0.181743  |
| 6      | 6      | 0      | -3.930679               | -2.243989 | 0.815614  |
| 7      | 7      | 0      | -2.579670               | 0.082382  | -1.549259 |
| 8      | 6      | 0      | -1.846880               | 0.487457  | -0.443917 |
| 9      | 6      | 0      | -2.199785               | -0.289107 | 0.643206  |
| 10     | 6      | 0      | -0.865253               | 1.634210  | -0.591863 |
| 11     | 6      | 0      | -0.126530               | 1.927180  | 0.760391  |
| 12     | 7      | 0      | 0.585889                | 0.738081  | 1.238007  |
| 13     | 6      | 0      | -0.122278               | -0.189993 | 2.128024  |
| 14     | 6      | 0      | -1.661832               | -0.175831 | 2.041923  |
| 15     | 6      | 0      | 1.433371                | 0.117220  | 0.203013  |

|    |   |   |           |           |           |
|----|---|---|-----------|-----------|-----------|
| 16 | 6 | 0 | 0.251166  | 1.307506  | -1.649706 |
| 17 | 6 | 0 | 1.604945  | 1.150391  | -0.933925 |
| 18 | 6 | 0 | 0.898088  | 3.068522  | 0.549375  |
| 19 | 6 | 0 | 2.033251  | 2.513250  | -0.358644 |
| 20 | 1 | 0 | -0.848679 | 2.231281  | 1.518098  |
| 21 | 1 | 0 | 2.347091  | 0.775204  | -1.643701 |
| 22 | 6 | 0 | 1.405242  | 3.636695  | 1.884194  |
| 23 | 6 | 0 | 2.335605  | 4.844736  | 1.729675  |
| 24 | 6 | 0 | 2.758830  | -0.365627 | 0.819418  |
| 25 | 6 | 0 | 3.576255  | -1.310829 | -0.043344 |
| 26 | 6 | 0 | 4.780285  | -1.967425 | 0.622013  |
| 27 | 8 | 0 | 3.266183  | -1.558584 | -1.202735 |
| 28 | 6 | 0 | 5.892490  | -2.450579 | -0.343331 |
| 29 | 6 | 0 | 6.520381  | -1.267756 | -1.103371 |
| 30 | 6 | 0 | 6.965026  | -3.204149 | 0.447704  |
| 31 | 8 | 0 | 5.351984  | -3.399151 | -1.261912 |
| 32 | 6 | 0 | -1.729395 | 2.806015  | -1.084145 |
| 33 | 8 | 0 | -1.975938 | 3.031683  | -2.253201 |
| 34 | 8 | 0 | -2.263810 | 3.516528  | -0.070693 |
| 35 | 6 | 0 | -3.183056 | 4.554490  | -0.456620 |
| 36 | 8 | 0 | -5.630448 | -3.984792 | 0.555248  |
| 37 | 6 | 0 | -5.478425 | -4.336703 | 1.916773  |
| 38 | 1 | 0 | -5.796200 | -3.272228 | -1.841793 |

|    |   |   |           |           |           |
|----|---|---|-----------|-----------|-----------|
| 39 | 1 | 0 | -4.517942 | -1.465198 | -2.998835 |
| 40 | 1 | 0 | -3.772086 | -2.456878 | 1.866801  |
| 41 | 1 | 0 | -2.568791 | 0.566873  | -2.435404 |
| 42 | 1 | 0 | 0.161964  | -0.004556 | 3.175732  |
| 43 | 1 | 0 | 0.219928  | -1.204254 | 1.887412  |
| 44 | 1 | 0 | -2.030175 | -1.012523 | 2.648631  |
| 45 | 1 | 0 | -2.049277 | 0.727041  | 2.534151  |
| 46 | 1 | 0 | 0.937441  | -0.768573 | -0.229141 |
| 47 | 1 | 0 | 0.004213  | 0.385405  | -2.184758 |
| 48 | 1 | 0 | 0.304661  | 2.105012  | -2.396963 |
| 49 | 1 | 0 | 0.383177  | 3.884730  | 0.024274  |
| 50 | 1 | 0 | 2.256894  | 3.205466  | -1.178684 |
| 51 | 1 | 0 | 2.963014  | 2.409409  | 0.213985  |
| 52 | 1 | 0 | 0.539447  | 3.930748  | 2.494294  |
| 53 | 1 | 0 | 1.913453  | 2.835683  | 2.435843  |
| 54 | 1 | 0 | 2.661032  | 5.217881  | 2.707361  |
| 55 | 1 | 0 | 3.236382  | 4.596227  | 1.156487  |
| 56 | 1 | 0 | 1.831910  | 5.669827  | 1.210618  |
| 57 | 1 | 0 | 2.563466  | -0.878479 | 1.772306  |
| 58 | 1 | 0 | 3.399320  | 0.484000  | 1.095160  |
| 59 | 1 | 0 | 5.187777  | -1.291977 | 1.385461  |
| 60 | 1 | 0 | 4.391069  | -2.842338 | 1.164693  |
| 61 | 1 | 0 | 7.292687  | -1.641211 | -1.783055 |

|    |   |   |           |           |           |
|----|---|---|-----------|-----------|-----------|
| 62 | 1 | 0 | 5.771128  | -0.740883 | -1.703309 |
| 63 | 1 | 0 | 6.983103  | -0.546488 | -0.418171 |
| 64 | 1 | 0 | 7.729650  | -3.583176 | -0.237963 |
| 65 | 1 | 0 | 6.523789  | -4.060644 | 0.968042  |
| 66 | 1 | 0 | 7.449195  | -2.554140 | 1.184950  |
| 67 | 1 | 0 | 4.586133  | -2.957435 | -1.674092 |
| 68 | 1 | 0 | -3.504094 | 5.019207  | 0.475641  |
| 69 | 1 | 0 | -2.688691 | 5.284429  | -1.102217 |
| 70 | 1 | 0 | -4.036581 | 4.126767  | -0.988300 |
| 71 | 1 | 0 | -6.174455 | -5.158688 | 2.096350  |
| 72 | 1 | 0 | -4.456054 | -4.673962 | 2.137514  |
| 73 | 1 | 0 | -5.728156 | -3.499482 | 2.583458  |

-----  
Standard orientation of **2b** at B3LYP/6-31G(d) level in gas phase:  
-----

| Center | Atomic | Atomic | Coordinates (Angstroms) |           |           |
|--------|--------|--------|-------------------------|-----------|-----------|
| Number | Number | Type   | X                       | Y         | Z         |
| 1      | 6      | 0      | -4.927585               | -2.745931 | 0.414160  |
| 2      | 6      | 0      | -5.173979               | -2.520277 | -0.958105 |
| 3      | 6      | 0      | -4.443594               | -1.566356 | -1.664240 |
| 4      | 6      | 0      | -3.469306               | -0.844024 | -0.979523 |
| 5      | 6      | 0      | -3.210750               | -1.053958 | 0.404703  |
| 6      | 6      | 0      | -3.953713               | -2.019397 | 1.097338  |
| 7      | 7      | 0      | -2.597212               | 0.136690  | -1.407063 |
| 8      | 6      | 0      | -1.812331               | 0.562559  | -0.343490 |
| 9      | 6      | 0      | -2.161044               | -0.146515 | 0.789897  |
| 10     | 6      | 0      | -0.787084               | 1.651581  | -0.580502 |
| 11     | 6      | 0      | 0.008894                | 1.980227  | 0.732191  |

|    |   |   |           |           |           |
|----|---|---|-----------|-----------|-----------|
| 12 | 7 | 0 | 0.683386  | 0.784634  | 1.249429  |
| 13 | 6 | 0 | -0.036555 | -0.060825 | 2.209449  |
| 14 | 6 | 0 | -1.577258 | 0.011916  | 2.163299  |
| 15 | 6 | 0 | 1.463754  | 0.069879  | 0.221804  |
| 16 | 6 | 0 | 0.276195  | 1.216484  | -1.654057 |
| 17 | 6 | 0 | 1.644129  | 1.033944  | -0.973683 |
| 18 | 6 | 0 | 1.076195  | 3.059640  | 0.425980  |
| 19 | 6 | 0 | 2.153361  | 2.402813  | -0.485182 |
| 20 | 1 | 0 | -0.675913 | 2.354213  | 1.495465  |
| 21 | 1 | 0 | 2.343806  | 0.585796  | -1.685518 |
| 22 | 6 | 0 | 1.655192  | 3.669956  | 1.711463  |
| 23 | 6 | 0 | 2.655296  | 4.804618  | 1.466116  |
| 24 | 6 | 0 | 2.785197  | -0.439527 | 0.825267  |
| 25 | 6 | 0 | 3.551968  | -1.442667 | -0.017486 |
| 26 | 6 | 0 | 4.754752  | -2.106176 | 0.644869  |
| 27 | 8 | 0 | 3.216101  | -1.705598 | -1.169857 |
| 28 | 6 | 0 | 5.830062  | -2.668133 | -0.322438 |
| 29 | 6 | 0 | 6.383109  | -1.556761 | -1.234536 |
| 30 | 6 | 0 | 6.963511  | -3.309455 | 0.481911  |
| 31 | 8 | 0 | 5.269666  | -3.724611 | -1.105625 |
| 32 | 6 | 0 | -1.612114 | 2.834185  | -1.111212 |
| 33 | 8 | 0 | -1.919669 | 2.992549  | -2.279689 |
| 34 | 8 | 0 | -2.076411 | 3.629708  | -0.122346 |
| 35 | 6 | 0 | -2.974491 | 4.671794  | -0.551521 |
| 36 | 8 | 0 | -5.608218 | -3.672420 | 1.172642  |
| 37 | 6 | 0 | -6.600121 | -4.457281 | 0.534728  |
| 38 | 1 | 0 | -5.934851 | -3.089475 | -1.479716 |
| 39 | 1 | 0 | -4.635325 | -1.399816 | -2.721567 |

|    |   |   |           |           |           |
|----|---|---|-----------|-----------|-----------|
| 40 | 1 | 0 | -3.797977 | -2.219941 | 2.153874  |
| 41 | 1 | 0 | -2.595116 | 0.582568  | -2.314602 |
| 42 | 1 | 0 | 0.284214  | 0.174278  | 3.237628  |
| 43 | 1 | 0 | 0.262359  | -1.100553 | 2.019401  |
| 44 | 1 | 0 | -1.962866 | -0.776571 | 2.823151  |
| 45 | 1 | 0 | -1.910389 | 0.956228  | 2.619799  |
| 46 | 1 | 0 | 0.914064  | -0.815611 | -0.145260 |
| 47 | 1 | 0 | -0.032377 | 0.278411  | -2.128344 |
| 48 | 1 | 0 | 0.341326  | 1.969602  | -2.447121 |
| 49 | 1 | 0 | 0.577962  | 3.869582  | -0.127192 |
| 50 | 1 | 0 | 2.385968  | 3.040374  | -1.347356 |
| 51 | 1 | 0 | 3.093864  | 2.281973  | 0.068478  |
| 52 | 1 | 0 | 0.826217  | 4.051461  | 2.326639  |
| 53 | 1 | 0 | 2.126932  | 2.867113  | 2.294745  |
| 54 | 1 | 0 | 3.026867  | 5.213349  | 2.413818  |
| 55 | 1 | 0 | 3.525850  | 4.465206  | 0.890815  |
| 56 | 1 | 0 | 2.192506  | 5.629436  | 0.907482  |
| 57 | 1 | 0 | 2.592293  | -0.916101 | 1.798887  |
| 58 | 1 | 0 | 3.461530  | 0.395640  | 1.061466  |
| 59 | 1 | 0 | 5.198542  | -1.399195 | 1.359347  |
| 60 | 1 | 0 | 4.357705  | -2.939202 | 1.247232  |
| 61 | 1 | 0 | 7.123126  | -1.983195 | -1.920546 |
| 62 | 1 | 0 | 5.585713  | -1.105824 | -1.836833 |
| 63 | 1 | 0 | 6.867163  | -0.761276 | -0.652725 |
| 64 | 1 | 0 | 7.705878  | -3.733269 | -0.203702 |
| 65 | 1 | 0 | 6.576347  | -4.122950 | 1.106244  |
| 66 | 1 | 0 | 7.461923  | -2.575114 | 1.126227  |
| 67 | 1 | 0 | 4.464555  | -3.340074 | -1.510484 |

|    |   |   |           |           |           |
|----|---|---|-----------|-----------|-----------|
| 68 | 1 | 0 | -3.244071 | 5.212178  | 0.357153  |
| 69 | 1 | 0 | -2.478265 | 5.334994  | -1.266284 |
| 70 | 1 | 0 | -3.861260 | 4.237444  | -1.022732 |
| 71 | 1 | 0 | -6.998515 | -5.119299 | 1.307995  |
| 72 | 1 | 0 | -7.416178 | -3.837971 | 0.133450  |
| 73 | 1 | 0 | -6.178708 | -5.064599 | -0.280078 |

Standard orientation of **3a** at B3LYP/6-31G(d) level in gas phase

| Center | Atomic | Atomic | Coordinates (Angstroms) |           |           |
|--------|--------|--------|-------------------------|-----------|-----------|
| Number | Number | Type   | X                       | Y         | Z         |
| 1      | 6      | 0      | -2.739662               | 3.640289  | 0.771878  |
| 2      | 6      | 0      | -1.715003               | 4.589028  | 0.832621  |
| 3      | 6      | 0      | -0.393297               | 4.253381  | 0.506773  |
| 4      | 6      | 0      | -2.464373               | 2.321908  | 0.370931  |
| 5      | 6      | 0      | -1.160051               | 1.973807  | 0.045258  |
| 6      | 6      | 0      | -0.137382               | 2.940038  | 0.121532  |
| 7      | 7      | 0      | 1.083635                | 2.350297  | -0.232080 |
| 8      | 6      | 0      | 0.936676                | 0.999691  | -0.419401 |
| 9      | 6      | 0      | -0.545918               | 0.675809  | -0.466937 |
| 10     | 6      | 0      | 1.891103                | 0.032625  | -0.509327 |
| 11     | 6      | 0      | 1.406247                | -1.397549 | -0.580695 |
| 12     | 6      | 0      | 0.260673                | -1.675903 | 0.442454  |
| 13     | 6      | 0      | -0.932054               | -0.622122 | 0.306419  |
| 14     | 7      | 0      | -2.125027               | -1.077894 | -0.417371 |
| 15     | 6      | 0      | -2.293419               | -0.474453 | -1.743585 |
| 16     | 6      | 0      | -1.019936               | 0.363049  | -1.925485 |
| 17     | 6      | 0      | -3.000225               | -1.932248 | 0.198461  |
| 18     | 8      | 0      | -2.762177               | -2.377825 | 1.323151  |
| 19     | 6      | 0      | -4.248312               | -2.313880 | -0.582239 |

|    |   |   |           |           |           |
|----|---|---|-----------|-----------|-----------|
| 20 | 6 | 0 | 0.758405  | -1.604955 | 1.910064  |
| 21 | 6 | 0 | 1.989218  | -2.459745 | 2.241235  |
| 22 | 6 | 0 | -0.272793 | -3.085943 | 0.161793  |
| 23 | 8 | 0 | -0.521570 | -3.494747 | -0.955327 |
| 24 | 6 | 0 | 3.297279  | 0.420988  | -0.422505 |
| 25 | 8 | 0 | 3.700509  | 1.580777  | -0.316502 |
| 26 | 8 | 0 | 4.148504  | -0.634658 | -0.461109 |
| 27 | 6 | 0 | 5.541179  | -0.308243 | -0.373263 |
| 28 | 1 | 0 | -3.755586 | 3.920912  | 1.038917  |
| 29 | 1 | 0 | -1.940478 | 5.606753  | 1.144140  |
| 30 | 1 | 0 | 0.403409  | 4.991452  | 0.563582  |
| 31 | 1 | 0 | -3.263598 | 1.584278  | 0.335014  |
| 32 | 1 | 0 | 2.012286  | 2.737621  | -0.091312 |
| 33 | 1 | 0 | 1.042125  | -1.666827 | -1.580500 |
| 34 | 1 | 0 | 2.238839  | -2.076887 | -0.383592 |
| 35 | 1 | 0 | -1.242843 | -0.377220 | 1.325695  |
| 36 | 1 | 0 | -2.386328 | -1.241896 | -2.521520 |
| 37 | 1 | 0 | -3.194662 | 0.154271  | -1.774881 |
| 38 | 1 | 0 | -0.255857 | -0.218221 | -2.449280 |
| 39 | 1 | 0 | -1.196308 | 1.279906  | -2.495187 |
| 40 | 1 | 0 | -3.979795 | -2.896041 | -1.473328 |
| 41 | 1 | 0 | -4.879024 | -2.925844 | 0.065609  |
| 42 | 1 | 0 | -4.813213 | -1.434830 | -0.917251 |
| 43 | 1 | 0 | 0.973600  | -0.558344 | 2.163411  |
| 44 | 1 | 0 | -0.083305 | -1.908971 | 2.548574  |
| 45 | 1 | 0 | 2.181299  | -2.440088 | 3.320951  |
| 46 | 1 | 0 | 1.851014  | -3.510580 | 1.953386  |
| 47 | 1 | 0 | 2.890792  | -2.091945 | 1.738067  |



|    |   |   |           |           |           |
|----|---|---|-----------|-----------|-----------|
| 48 | 1 | 0 | -0.460935 | -3.717207 | 1.055736  |
| 49 | 1 | 0 | 5.840920  | 0.341864  | -1.202271 |
| 50 | 1 | 0 | 5.764108  | 0.201041  | 0.570608  |
| 51 | 1 | 0 | 6.071020  | -1.261841 | -0.426014 |

Standard orientation of **3b** at B3LYP/6-31G(d) level in gas phase

| Center | Atomic | Atomic | Coordinates (Angstroms) |           |           |
|--------|--------|--------|-------------------------|-----------|-----------|
| Number | Number | Type   | X                       | Y         | Z         |
| 1      | 6      | 0      | -0.932127               | 4.351186  | 0.816378  |
| 2      | 6      | 0      | 0.397815                | 4.770339  | 0.880105  |
| 3      | 6      | 0      | 1.447074                | 3.908471  | 0.538859  |
| 4      | 6      | 0      | -1.246275               | 3.049508  | 0.397814  |
| 5      | 6      | 0      | -0.217532               | 2.183153  | 0.057073  |
| 6      | 6      | 0      | 1.116279                | 2.619239  | 0.136353  |
| 7      | 7      | 0      | 1.967097                | 1.571833  | -0.236725 |
| 8      | 6      | 0      | 1.261268                | 0.409748  | -0.438396 |
| 9      | 6      | 0      | -0.218825               | 0.756533  | -0.472323 |
| 10     | 6      | 0      | 1.691544                | -0.876191 | -0.547128 |
| 11     | 6      | 0      | 0.627461                | -1.945862 | -0.622657 |
| 12     | 6      | 0      | -0.510208               | -1.719531 | 0.417930  |
| 13     | 6      | 0      | -1.122256               | -0.250288 | 0.303325  |
| 14     | 7      | 0      | -2.400846               | -0.131027 | -0.401678 |
| 15     | 6      | 0      | -2.304955               | 0.478238  | -1.730913 |
| 16     | 6      | 0      | -0.798765               | 0.692486  | -1.925468 |
| 17     | 6      | 0      | -3.546687               | -0.544280 | 0.217925  |
| 18     | 8      | 0      | -3.500249               | -1.080396 | 1.326567  |
| 19     | 6      | 0      | -4.845610               | -0.358898 | -0.542436 |
| 20     | 6      | 0      | -0.019237               | -1.893520 | 1.877594  |
| 21     | 6      | 0      | 0.728710                | -3.198486 | 2.178697  |

|    |   |   |           |           |           |
|----|---|---|-----------|-----------|-----------|
| 22 | 6 | 0 | -1.604719 | -2.747629 | 0.123469  |
| 23 | 8 | 0 | -2.024537 | -2.968052 | -0.995314 |
| 24 | 6 | 0 | 3.087257  | -1.296553 | -0.460509 |
| 25 | 8 | 0 | 3.479182  | -2.452269 | -0.438306 |
| 26 | 8 | 0 | 3.970753  | -0.244437 | -0.376848 |
| 27 | 6 | 0 | 5.351306  | -0.627419 | -0.273264 |
| 28 | 1 | 0 | -1.729111 | 5.034140  | 1.095217  |
| 29 | 1 | 0 | 0.628700  | 5.780897  | 1.205884  |
| 30 | 1 | 0 | 2.481695  | 4.234468  | 0.598207  |
| 31 | 1 | 0 | -2.281963 | 2.723057  | 0.361169  |
| 32 | 1 | 0 | 2.966168  | 1.542278  | -0.083724 |
| 33 | 1 | 0 | 0.167436  | -2.011490 | -1.615442 |
| 34 | 1 | 0 | 1.098807  | -2.916666 | -0.455409 |
| 35 | 1 | 0 | -1.283834 | 0.093148  | 1.327446  |
| 36 | 1 | 0 | -2.721775 | -0.180749 | -2.500282 |
| 37 | 1 | 0 | -2.853124 | 1.429231  | -1.762227 |
| 38 | 1 | 0 | -0.362247 | -0.152001 | -2.463118 |
| 39 | 1 | 0 | -0.572928 | 1.602766  | -2.486321 |
| 40 | 1 | 0 | -4.859252 | -0.998958 | -1.432966 |
| 41 | 1 | 0 | -5.668600 | -0.646346 | 0.113411  |
| 42 | 1 | 0 | -4.986333 | 0.676479  | -0.873630 |
| 43 | 1 | 0 | 0.625622  | -1.045129 | 2.139707  |
| 44 | 1 | 0 | -0.904458 | -1.815352 | 2.523495  |
| 45 | 1 | 0 | 0.925763  | -3.279491 | 3.253728  |
| 46 | 1 | 0 | 0.146338  | -4.081701 | 1.887299  |
| 47 | 1 | 0 | 1.691274  | -3.248882 | 1.659931  |
| 48 | 1 | 0 | -2.009235 | -3.296608 | 0.996888  |
| 49 | 1 | 0 | 5.913037  | 0.307236  | -0.230539 |

|                                                                        |        |        |                         |           |           |
|------------------------------------------------------------------------|--------|--------|-------------------------|-----------|-----------|
| 50                                                                     | 1      | 0      | 5.521226                | -1.219705 | 0.630031  |
| 51                                                                     | 1      | 0      | 5.652727                | -1.216491 | -1.143297 |
| -----                                                                  |        |        |                         |           |           |
| Standard orientation of <b>3c</b> at B3LYP/6-31G(d) level in gas phase |        |        |                         |           |           |
| -----                                                                  |        |        |                         |           |           |
| Center                                                                 | Atomic | Atomic | Coordinates (Angstroms) |           |           |
| Number                                                                 | Number | Type   | X                       | Y         | Z         |
| -----                                                                  |        |        |                         |           |           |
| 1                                                                      | 6      | 0      | -2.537590               | 3.641202  | 0.558253  |
| 2                                                                      | 6      | 0      | -1.495276               | 4.550180  | 0.569756  |
| 3                                                                      | 6      | 0      | -0.194595               | 4.158695  | 0.268114  |
| 4                                                                      | 6      | 0      | -2.300300               | 2.306874  | 0.231281  |
| 5                                                                      | 6      | 0      | -1.018838               | 1.904012  | -0.071264 |
| 6                                                                      | 6      | 0      | 0.019027                | 2.833087  | -0.042346 |
| 7                                                                      | 7      | 0      | 1.220534                | 2.203508  | -0.354658 |
| 8                                                                      | 6      | 0      | 1.049225                | 0.852164  | -0.429514 |
| 9                                                                      | 6      | 0      | -0.436348               | 0.565412  | -0.508364 |
| 10                                                                     | 6      | 0      | 1.961553                | -0.128425 | -0.393840 |
| 11                                                                     | 6      | 0      | 1.481280                | -1.562689 | -0.445281 |
| 12                                                                     | 6      | 0      | 0.177908                | -1.836382 | 0.354379  |
| 13                                                                     | 6      | 0      | -0.875570               | -0.658319 | 0.318325  |
| 14                                                                     | 7      | 0      | -2.144335               | -1.009885 | -0.329227 |
| 15                                                                     | 6      | 0      | -2.243565               | -0.518721 | -1.702424 |
| 16                                                                     | 6      | 0      | -0.901719               | 0.178128  | -1.934734 |
| 17                                                                     | 6      | 0      | -3.150320               | -1.586407 | 0.375315  |
| 18                                                                     | 8      | 0      | -3.001321               | -1.937199 | 1.517853  |
| 19                                                                     | 6      | 0      | -4.465300               | -1.787830 | -0.346051 |

|    |   |   |           |           |           |
|----|---|---|-----------|-----------|-----------|
| 20 | 6 | 0 | 0.485004  | -2.212649 | 1.827209  |
| 21 | 6 | 0 | 1.290648  | -1.203979 | 2.647625  |
| 22 | 6 | 0 | -0.499462 | -3.071748 | -0.245921 |
| 23 | 8 | 0 | -0.345083 | -3.466469 | -1.358013 |
| 24 | 6 | 0 | 3.380152  | 0.221667  | -0.294563 |
| 25 | 8 | 0 | 3.808422  | 1.345510  | -0.258295 |
| 26 | 8 | 0 | 4.182670  | -0.831661 | -0.236581 |
| 27 | 6 | 0 | 5.571978  | -0.579543 | -0.138992 |
| 28 | 1 | 0 | -3.533303 | 3.961571  | 0.804874  |
| 29 | 1 | 0 | -1.687948 | 5.577491  | 0.822541  |
| 30 | 1 | 0 | 0.615539  | 4.865081  | 0.286012  |
| 31 | 1 | 0 | -3.114891 | 1.606172  | 0.234902  |
| 32 | 1 | 0 | 2.126395  | 2.584922  | -0.193655 |
| 33 | 1 | 0 | 1.333125  | -1.875486 | -1.470359 |
| 34 | 1 | 0 | 2.252323  | -2.212377 | -0.055215 |
| 35 | 1 | 0 | -1.093840 | -0.368731 | 1.332516  |
| 36 | 1 | 0 | -2.395251 | -1.330442 | -2.402953 |
| 37 | 1 | 0 | -3.068882 | 0.176323  | -1.804569 |
| 38 | 1 | 0 | -0.199312 | -0.512652 | -2.380373 |
| 39 | 1 | 0 | -0.988211 | 1.038234  | -2.584887 |
| 40 | 1 | 0 | -4.332510 | -2.393305 | -1.235951 |
| 41 | 1 | 0 | -5.145284 | -2.285570 | 0.328736  |
| 42 | 1 | 0 | -4.895000 | -0.839547 | -0.651256 |

|    |   |   |           |           |           |
|----|---|---|-----------|-----------|-----------|
| 43 | 1 | 0 | -0.459667 | -2.399859 | 2.326517  |
| 44 | 1 | 0 | 1.027654  | -3.156799 | 1.825506  |
| 45 | 1 | 0 | 1.373700  | -1.556730 | 3.670742  |
| 46 | 1 | 0 | 2.294827  | -1.077058 | 2.262037  |
| 47 | 1 | 0 | 0.820367  | -0.226724 | 2.679484  |
| 48 | 1 | 0 | -1.165782 | -3.604448 | 0.435634  |
| 49 | 1 | 0 | 6.044231  | -1.549263 | -0.111921 |
| 50 | 1 | 0 | 5.917101  | -0.018215 | -0.994953 |
| 51 | 1 | 0 | 5.796368  | -0.027769 | 0.762293  |

-----  
Standard orientation of **3d** at B3LYP/6-31G(d) level in gas phase

| Center | Atomic | Atomic | Coordinates (Angstroms) |           |           |
|--------|--------|--------|-------------------------|-----------|-----------|
| Number | Number | Type   | X                       | Y         | Z         |
| -----  |        |        |                         |           |           |
| 1      | 6      | 0      | -2.514891               | 3.674948  | 0.658675  |
| 2      | 6      | 0      | -1.467083               | 4.569082  | 0.784163  |
| 3      | 6      | 0      | -0.155355               | 4.186139  | 0.519839  |
| 4      | 6      | 0      | -2.271310               | 2.363681  | 0.252272  |
| 5      | 6      | 0      | -0.979604               | 1.971096  | -0.014775 |
| 6      | 6      | 0      | 0.064012                | 2.883366  | 0.127974  |
| 7      | 7      | 0      | 1.273289                | 2.260792  | -0.170794 |
| 8      | 6      | 0      | 1.094447                | 0.924311  | -0.363698 |
| 9      | 6      | 0      | -0.391359               | 0.659686  | -0.513746 |
| 10     | 6      | 0      | 1.990027                | -0.072385 | -0.414055 |
| 11     | 6      | 0      | 1.449696                | -1.480838 | -0.540192 |

|    |   |   |           |           |           |
|----|---|---|-----------|-----------|-----------|
| 12 | 6 | 0 | 0.229531  | -1.713750 | 0.385102  |
| 13 | 6 | 0 | -0.890443 | -0.622307 | 0.200986  |
| 14 | 7 | 0 | -2.032492 | -1.029522 | -0.634086 |
| 15 | 6 | 0 | -2.058006 | -0.383474 | -1.945972 |
| 16 | 6 | 0 | -0.751915 | 0.401613  | -2.001432 |
| 17 | 6 | 0 | -3.136121 | -1.581918 | -0.058494 |
| 18 | 8 | 0 | -3.161222 | -1.890063 | 1.104519  |
| 19 | 6 | 0 | -4.335908 | -1.815565 | -0.952077 |
| 20 | 6 | 0 | 0.723251  | -1.688906 | 1.864150  |
| 21 | 6 | 0 | -0.221785 | -2.248270 | 2.935062  |
| 22 | 6 | 0 | -0.342740 | -3.094548 | 0.089372  |
| 23 | 8 | 0 | 0.149983  | -3.869861 | -0.668731 |
| 24 | 6 | 0 | 3.412935  | 0.237677  | -0.277494 |
| 25 | 8 | 0 | 3.857665  | 1.346094  | -0.126669 |
| 26 | 8 | 0 | 4.196616  | -0.828725 | -0.331849 |
| 27 | 6 | 0 | 5.589373  | -0.613617 | -0.204914 |
| 28 | 1 | 0 | -3.518947 | 3.988898  | 0.877976  |
| 29 | 1 | 0 | -1.664359 | 5.578386  | 1.098326  |
| 30 | 1 | 0 | 0.657303  | 4.881643  | 0.626753  |
| 31 | 1 | 0 | -3.089872 | 1.671435  | 0.167064  |
| 32 | 1 | 0 | 2.178272  | 2.624367  | 0.031515  |
| 33 | 1 | 0 | 1.179501  | -1.716613 | -1.563234 |
| 34 | 1 | 0 | 2.215511  | -2.194767 | -0.281790 |

|    |   |   |           |           |           |
|----|---|---|-----------|-----------|-----------|
| 35 | 1 | 0 | -1.277262 | -0.369172 | 1.173500  |
| 36 | 1 | 0 | -2.122127 | -1.111189 | -2.745705 |
| 37 | 1 | 0 | -2.910486 | 0.280886  | -2.030796 |
| 38 | 1 | 0 | 0.020164  | -0.186313 | -2.475792 |
| 39 | 1 | 0 | -0.850995 | 1.325321  | -2.555347 |
| 40 | 1 | 0 | -4.061505 | -2.338922 | -1.860472 |
| 41 | 1 | 0 | -5.053586 | -2.401851 | -0.398273 |
| 42 | 1 | 0 | -4.795952 | -0.874312 | -1.235184 |
| 43 | 1 | 0 | 1.658944  | -2.237441 | 1.912146  |
| 44 | 1 | 0 | 0.966426  | -0.661616 | 2.113506  |
| 45 | 1 | 0 | 0.187332  | -2.035049 | 3.917560  |
| 46 | 1 | 0 | -1.215544 | -1.822396 | 2.885316  |
| 47 | 1 | 0 | -0.324779 | -3.325747 | 2.859978  |
| 48 | 1 | 0 | -1.240954 | -3.365405 | 0.639224  |
| 49 | 1 | 0 | 6.044210  | -1.589155 | -0.279160 |
| 50 | 1 | 0 | 5.948523  | 0.028691  | -0.995799 |
| 51 | 1 | 0 | 5.819762  | -0.164256 | 0.750232  |

---

[1] Goto, H.; Osawa, E.; *J. Am. Chem. Soc.* **1989**, *111*, 8950–8951.

[2] Goto, H.; Osawa, E.; *J. Chem. Soc., Perkin Trans. 2*, **1993**, 187–198.

[3] Frisch, M. J.; Trucks, G. W.; Schlegel, H. B.; Scuseria, G. E.; Robb, M. A.; Cheeseman, J. R.; Scalmani, G.; Barone, V.; Mennucci, B.; Petersson, G. A.; Nakatsuji, H.; Caricato, M.; Li, X.; Hratchian, H. P.; Izmaylov, A. F.; Bloino, J.; Zheng, G.; Sonnenberg, J. L.; Hada, M.; Ehara, M.; Toyota, K.; Fukuda, R.; Hasegawa, J.; Ishida, M.;

Nakajima, T.; Honda, Y.; Kitao, O.; Nakai, H.; Vreven, T.; Montgomery, J. A.; Jr., Peralta, J. E.; Ogliaro, F.; Bearpark, M.; Heyd, J. J.; Brothers, E.; Kudin, K. N.; Staroverov, V. N.; Keith, T.; Kobayashi, R.; Normand, J.; Raghavachari, K.; Rendell, A.; Burant, J. C.; Iyengar, S. S.; Tomasi, J.; Cossi, M.; Rega, N.; Millam, J. M.; Klene, M.; Knox, J. E.; Cross, J. B.; Bakken, V.; Adamo, C.; Jaramillo, J.; Gomperts, R.; Stratmann, R. E.; Yazyev, O.; Austin, A. J.; Cammi, R.; Pomelli, C.; Ochterski, J. W.; Martin, R. L.; Morokuma, K.; Zakrzewski, V. G.; Voth, G. A.; Salvador, P.; Dannenberg, J. J.; Dapprich, S.; Daniels, A. D.; Farkas, O.; Foresman, J. B.; Ortiz, J. V.; Cioslowski, J.; and Fox, D. J.; Gaussian 09, Revision B.01, Gaussian, Inc., Wallingford CT, 2010.

[4]. Bruhn, T.; Hemberger, Y.; Schaumlöffel, A.; Bringmann, G. *Spec Dis*, version 1.60, University of Würzburg, Germany, 2.



Figure S29. Uncropped images of western blot in Figure 7

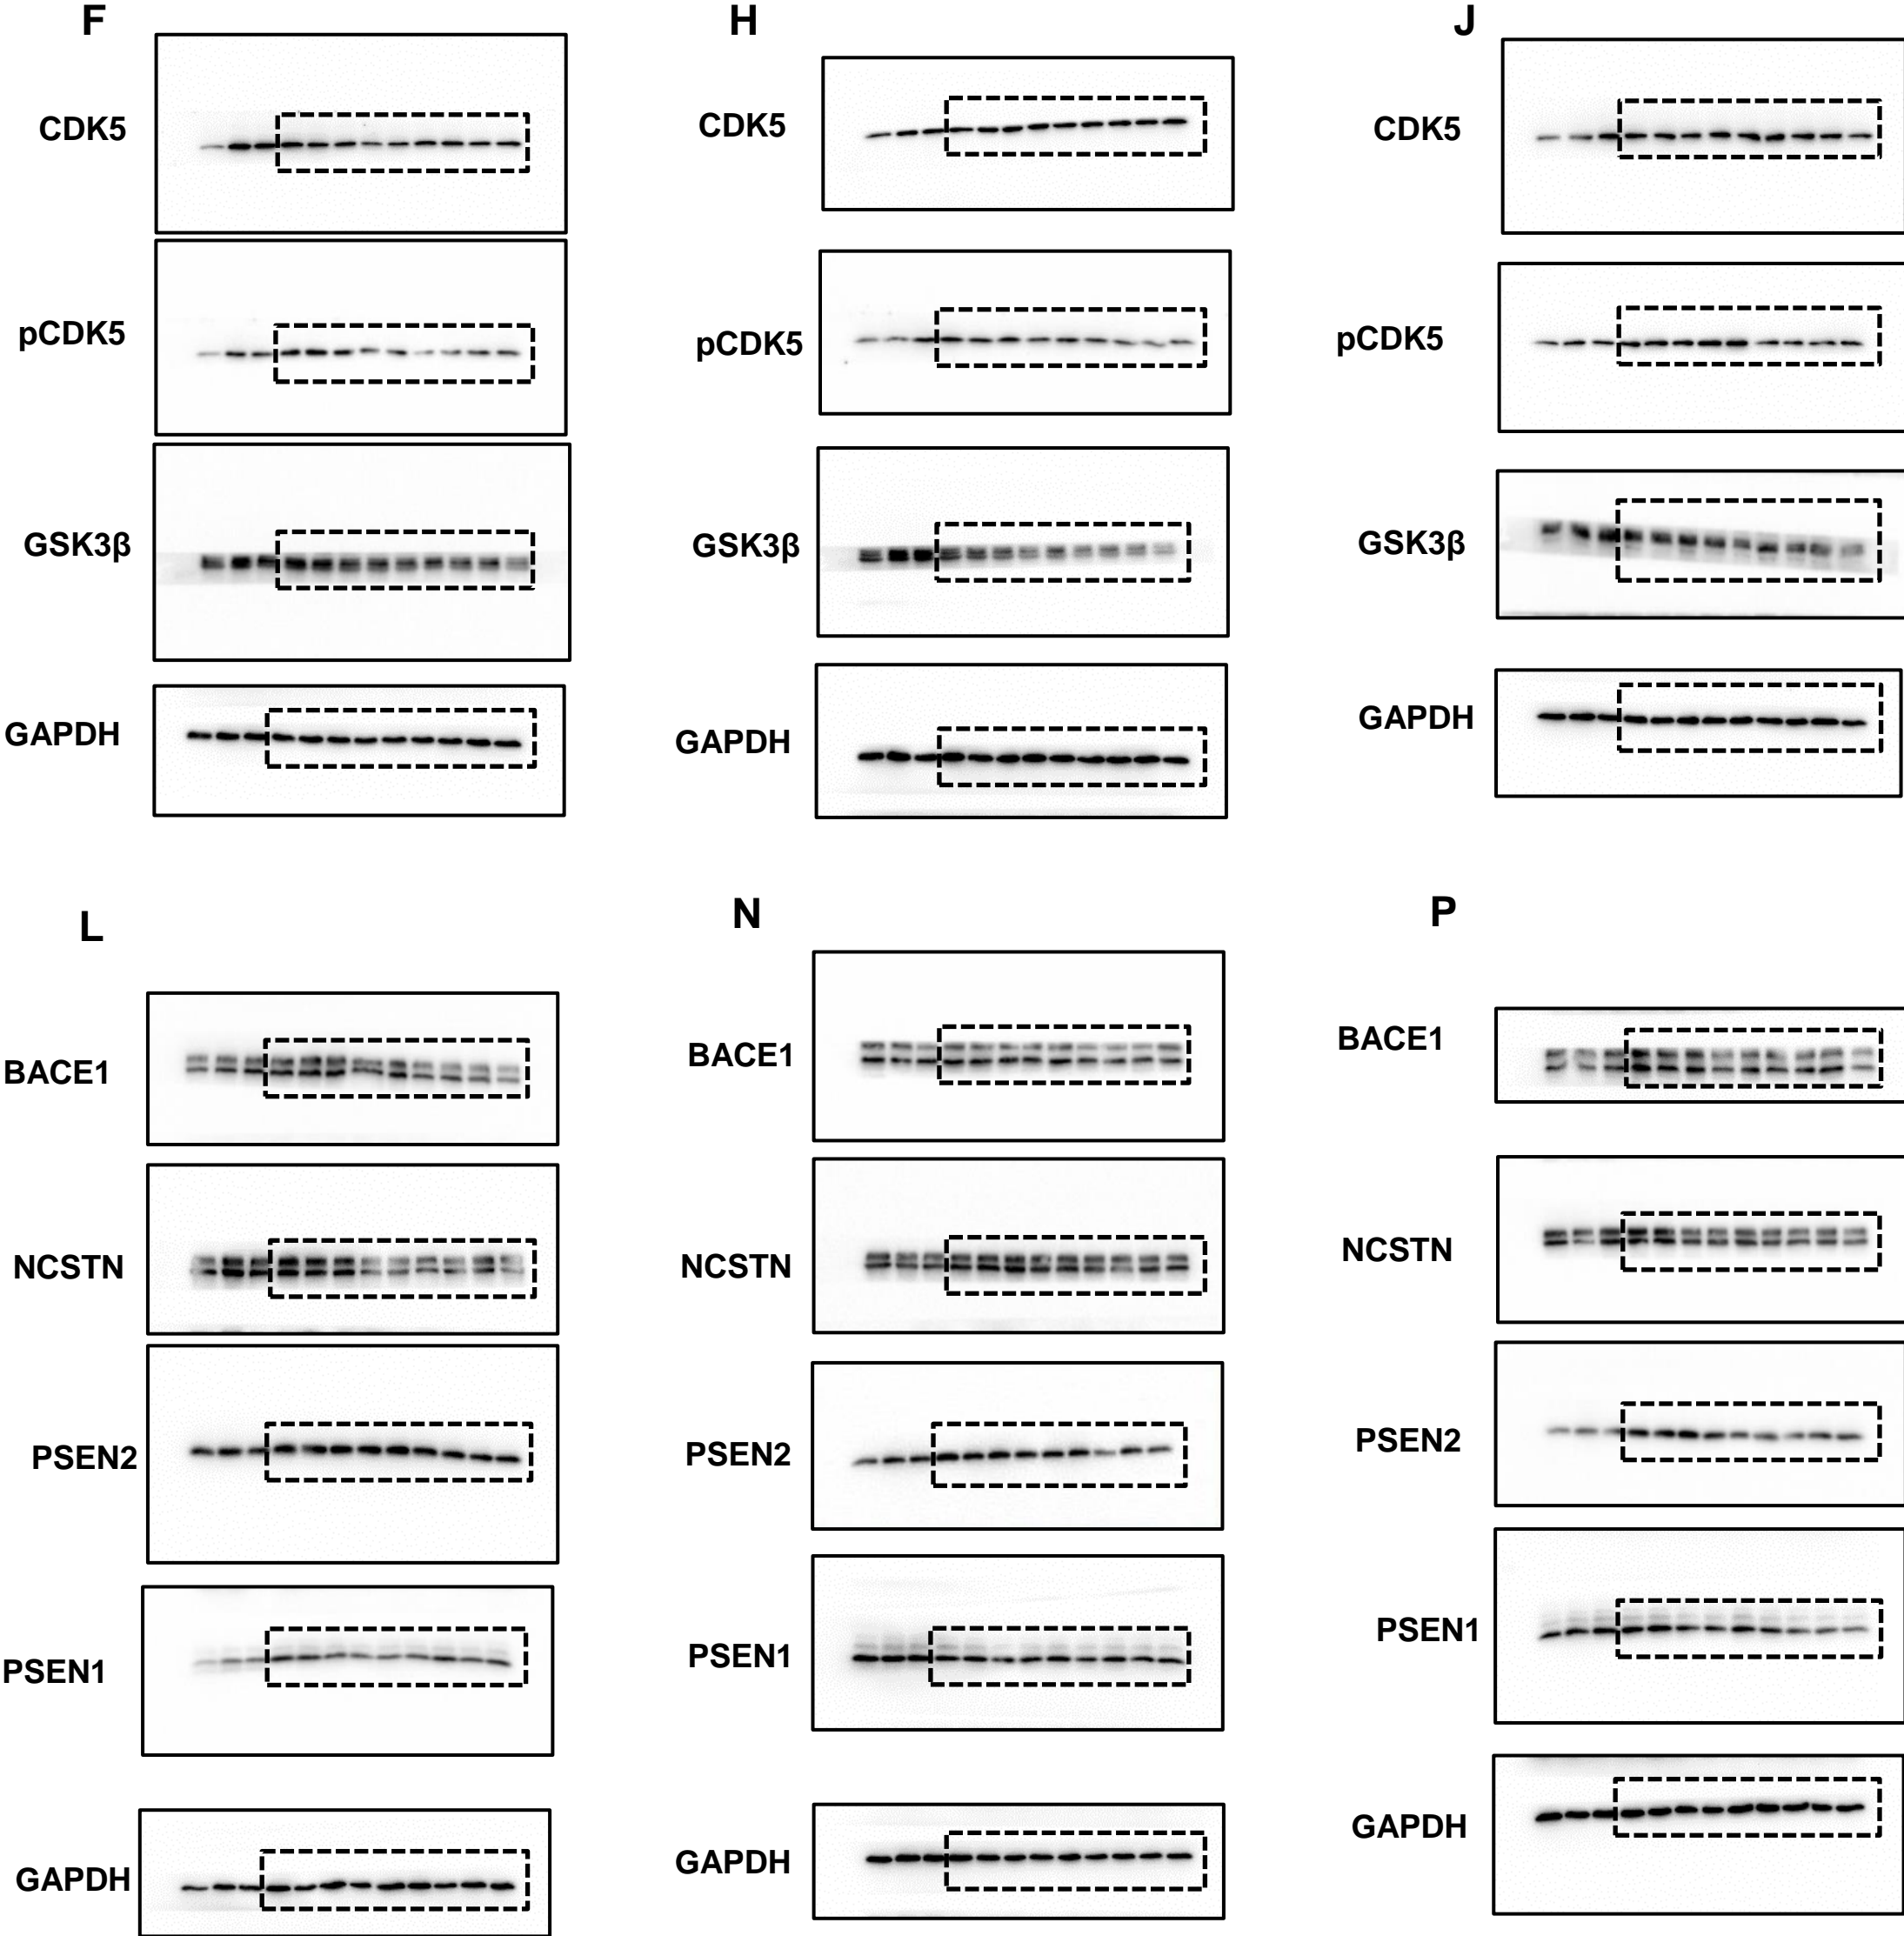

Supplement: s1 [file s1]
